# Supplementary material for: Feasibility study to assess the delivery of a lifestyle intervention (TreatWELL) for patients with colorectal cancer undergoing potentially curative treatment
Source: PubMed Central journal article supplement — BMJ Open. 2018 Jun 6;8(6):e021117. doi: 10.1136/bmjopen-2017-021117 (PMC6009630; doi:10.1136/bmjopen-2017-021117), 2018-06-06
Supplement: bmjopen-2017-021117.draft_revisions.pdf [file bmjopen-2017-021117.draft_revisions.pdf]

# BMJ Open

BMJ Open is committed to open peer review. As part of this commitment we make the peer review history of every article we publish publicly available.

When an article is published we post the peer reviewers' comments and the authors' responses online. We also post the versions of the paper that were used during peer review. These are the versions that the peer review comments apply to.

The versions of the paper that follow are the versions that were submitted during the peer review process. They are not the versions of record or the final published versions. They should not be cited or distributed as the published version of this manuscript.

BMJ Open is an open access journal and the full, final, typeset and author-corrected version of record of the manuscript is available on our site with no access controls, subscription charges or pay-per-view fees (<http://bmjopen.bmj.com>).

If you have any questions on BMJ Open's open peer review process please email [info.bmjopen@bmj.com](mailto:info.bmjopen@bmj.com)

# BMJ Open

## A feasibility study to assess the delivery of a lifestyle intervention (TreatWELL) for colorectal cancer patients undergoing potentially curative treatment.

|                               |                                                                                                                                                                                                                                                                                                                                                                                                                                                                                                                                                                                                                                                                                                                                                                                                                                                                                                                                                                                                                                                                                                                                                    |
|-------------------------------|----------------------------------------------------------------------------------------------------------------------------------------------------------------------------------------------------------------------------------------------------------------------------------------------------------------------------------------------------------------------------------------------------------------------------------------------------------------------------------------------------------------------------------------------------------------------------------------------------------------------------------------------------------------------------------------------------------------------------------------------------------------------------------------------------------------------------------------------------------------------------------------------------------------------------------------------------------------------------------------------------------------------------------------------------------------------------------------------------------------------------------------------------|
| Journal:                      | <i>BMJ Open</i>                                                                                                                                                                                                                                                                                                                                                                                                                                                                                                                                                                                                                                                                                                                                                                                                                                                                                                                                                                                                                                                                                                                                    |
| Manuscript ID                 | bmjopen-2017-021117                                                                                                                                                                                                                                                                                                                                                                                                                                                                                                                                                                                                                                                                                                                                                                                                                                                                                                                                                                                                                                                                                                                                |
| Article Type:                 | Research                                                                                                                                                                                                                                                                                                                                                                                                                                                                                                                                                                                                                                                                                                                                                                                                                                                                                                                                                                                                                                                                                                                                           |
| Date Submitted by the Author: | 12-Dec-2017                                                                                                                                                                                                                                                                                                                                                                                                                                                                                                                                                                                                                                                                                                                                                                                                                                                                                                                                                                                                                                                                                                                                        |
| Complete List of Authors:     | <p>Macleod, Maureen; University of Dundee, Centre for Research into Cancer Prevention and Screening, Division of Cancer Research</p> <p>Steele, Robert; University of Dundee, Centre for Research into Cancer Prevention and Screening, Division of Cancer Research</p> <p>O'carroll, Ronan; University of Stirling, Division of Psychology. School of Natural Sciences</p> <p>Wells, Mary; University of Stirling, NMAHP Research Unit</p> <p>campbell, anna; EDinburgh Napier UNiversity, School of life sciences, sport and social sciences</p> <p>Sugden, Jacqui; University of Dundee, Centre for Research into Cancer Prevention and Screening, Division of Cancer Research</p> <p>Rodger, Jackie; University of Dundee, Centre for Research into Cancer Prevention and Screening, Division of Cancer Research</p> <p>Stead, Martine; University of Stirling and the Open University, Institute for Social Marketing</p> <p>McKell, Jennifer; University of Stirling, Institute for Social Marketing</p> <p>Anderson, Annie; University of Dundee, Centre for Research into Cancer Prevention and Screening, Division of Cancer Research</p> |
| Keywords:                     | Prehabilitation, Lifestyle intervention, Colorectal cancer                                                                                                                                                                                                                                                                                                                                                                                                                                                                                                                                                                                                                                                                                                                                                                                                                                                                                                                                                                                                                                                                                         |
|                               |                                                                                                                                                                                                                                                                                                                                                                                                                                                                                                                                                                                                                                                                                                                                                                                                                                                                                                                                                                                                                                                                                                                                                    |

SCHOLARONE™  
Manuscripts

1  
2  
3  
4 **A FEASIBILITY STUDY TO ASSESS THE DELIVERY OF A LIFESTYLE INTERVENTION (TREATWELL) FOR**  
5 **COLORECTAL CANCER PATIENTS UNDERGOING POTENTIALLY CURATIVE TREATMENT.**  
6  
7

8  
9 **Authors**

10 Maureen Macleod<sup>1</sup>, Robert JC Steele<sup>1</sup>, Ronan E O'Carroll<sup>2</sup>, Mary Wells<sup>3</sup>, Anna Campbell<sup>4</sup>, Jacqui Sugden<sup>1</sup>,  
11 Jackie Rodger<sup>1</sup>, Martine Stead<sup>5</sup>, Jennifer McKell<sup>5</sup> Annie S Anderson<sup>1</sup>  
12  
13

14  
15 **Addresses**

- 16  
17  
18 1. Centre for Research into Cancer Prevention and Screening, Division of Cancer Research,  
19 University of Dundee, Level 7, Ninewells Hospital & Medical School, Dundee DD1 9SY, UK  
20 [m.macleod@dundee.ac.uk](mailto:m.macleod@dundee.ac.uk); [r.j.c.steele@dundee.ac.uk](mailto:r.j.c.steele@dundee.ac.uk); [J.A.Sugden@dundee.ac.uk](mailto:J.A.Sugden@dundee.ac.uk) ;  
21 [jackierodger@nhs.net](mailto:jackierodger@nhs.net); [a.s.anderson@dundee.ac.uk](mailto:a.s.anderson@dundee.ac.uk)  
22  
23 2. Division of Psychology, School of Natural Sciences, University of Stirling, Stirling, FK9 4LA, UK  
24 [ronan.ocarroll@stir.ac.uk](mailto:ronan.ocarroll@stir.ac.uk)  
25  
26 3. Nursing, Midwifery and Allied Health Professions Research Unit, University of Stirling, Stirling FK9  
27 4LA  
28 [mary.wells@stir.ac.uk](mailto:mary.wells@stir.ac.uk)  
29  
30 4. Department Sport Exercise and Health Science, School of Applied Science, Edinburgh Napier  
31 University, Edinburgh EH11 4BN  
32 [anna.campbell@napier.ac.uk](mailto:anna.campbell@napier.ac.uk)  
33  
34 5. Institute for Social Marketing, University of Stirling, Stirling FK9 4LA, Scotland, UK  
35 [martine.stead@stir.ac.uk](mailto:martine.stead@stir.ac.uk) [j.e.mckell@stir.ac.uk](mailto:j.e.mckell@stir.ac.uk)  
36  
37  
38  
39  
40  
41  
42

43 **Correspondence to:**

44 Professor Annie S. Anderson  
45 Centre for Research into Cancer Prevention and Screening  
46 Level 7, Mailbox 7,  
47 Ninewells Medical School  
48 University of Dundee  
49 Dundee DD1 9SY  
50

51 Tel: 0044 (0)1382 383299 Fax: 0044 (0)1382 632333 E mail: [a.s.anderson@dundee.ac.uk](mailto:a.s.anderson@dundee.ac.uk)  
52  
53

54  
55 Word count: Abstract 295 Paper 4327  
56  
57  
58  
59  
60

**ABSTRACT**

**Objectives** To assess the feasibility of delivering and evaluating a lifestyle programme for colorectal cancer patients undergoing potentially curative treatments.

**Study design** Non-randomised feasibility trial

**Setting** NHS Tayside

**Participants** Adults with stage I to III colorectal cancer

**Intervention** The programme targeted smoking, alcohol, physical activity, diet and weight management. It was delivered in 3 face-to-face counselling sessions (plus 9 phone calls) by lifestyle coaches over three phases (1 - pre-surgery, 2 - surgical recovery and 3 - post treatment recovery).

**Primary outcome** Feasibility measures (recruitment, retention, programme implementation, achieved measures, fidelity, factors affecting protocol adherence and acceptability).

**Secondary outcomes** Measured changes in body weight, waist circumference, walking and self-reported physical activity, diet, smoking and alcohol intake, fatigue, bowel function and Quality of Life (QoL).

**Results** Of 84 patients diagnosed, 22 (26%) were recruited and 15 (18%) completed the study. Median time for intervention delivery was 5.5 hours. Coaches reported covering most (>70%) of the intervention components but had difficulties during phase 2. Evaluation measures (except walk test) were achieved by all participants at baseline, and most (<90%) at end of phase 2 and phase 3, but <20% at end of phase 1. Protocol challenges included limited time between diagnosis and surgery and the presence of co-morbidities. The intervention was rated highly by participants but limited support from NHS staff was noted. The majority of participants (77%) had a BMI >25kg/m<sup>2</sup> and none were underweight. Physical activity data showed a positive trend towards increased activity overall but no other changes in secondary outcomes were detected.

**Conclusions** Further research is required to optimise recruitment and evaluate more appropriate assessment tools. Protocols for phase 2 and 3 need flexibility to allow for variation in clinical progress. Ways for NHS staff to facilitate the programme should be explored.

**Trial registration number** ISRCTN 52345929

## STRENGTHS AND LIMITATIONS

- This feasibility study is the first to have offered a comprehensive lifestyle intervention programme at diagnosis with support before, during and after treatment in patients with colorectal cancer.
- The study highlights the wide range of variables that need to be considered in designing a future randomised controlled trial (including recruitment and support from NHS staff, complexities of patient health status and time required for permissions, assessment and interventions).
- The lack of randomisation means it is not possible to estimate uptake to a randomised controlled trial.
- The work was undertaken in a single NHS health board and may not be representative of other treatment centres.

## COMPETING INTEREST STATEMENT

All authors have completed the ICMJE uniform disclosure form at [www.icmje.org/coi\\_disclosure.pdf](http://www.icmje.org/coi_disclosure.pdf) and declare: no support from any organisation for the submitted work other than the Chief Scientist Office who funded the award, no financial relationships with any organisations that might have an interest in the submitted work in the previous three years, no other relationships or activities that could appear to have influenced the submitted work.

## ETHICS, CONSENTS AND PERMISSIONS

Ethical approval was provided by the East of Scotland Research Ethics Service, REC reference no. 13/ES/0153. All participants provided written, informed consent.

## FUNDING

Funding for this study was provided by the Chief Scientist Office (CZH/4/939). The funders played no part in the design, execution or decision to publish this research.

## AUTHORS' CONTRIBUTION

All authors have made substantial contributions to the study conception and design, and the development and editing of the manuscript. MM led initial study design and development, assisted with data collection, carried out the analyses and drafted the initial draft manuscript; RJCS had the initial concept and led initial study design and development; RO'C led the fidelity assessments (development and analyses) and provided guidance on project progression; MW had the initial concept and led initial study design and development; AC contributed to study design; JS carried out the day to day management of the study and led the data collection; JR contributed to study design; MS and JMCK led on qualitative assessments (development and analyses); ASA had the initial concept and led initial study design and development, contributed to data analyses and had oversight of the study.

All authors have read, edited and approved the manuscript for publication.

## ACKNOWLEDGEMENTS

We would like to thank the participants of this study, lifestyle coaches Catherine Savage and Carol Baird and the study administrator Jill Hampton who arranged the interviews and FGDs.

**DATA SHARING**

Technical appendix, statistical code, and dataset available from the authors on request.

For peer review only

## INTRODUCTION

Colorectal cancer (CRC) survival has improved in the last decade due to earlier diagnosis and new treatments but, in Scotland, survivors still have notable excess mortality within the **first year post diagnosis** compared to other European countries [1]. Survivors also have a high rate of pre-existing co-morbidities and treatment related symptoms. The latter are experienced by 15% undergoing colonic surgery, 33% with rectal surgery, 50% of those with chemo-radiation therapy and 66% of patients undergoing short course radiotherapy. These symptoms include fatigue, physical discomfort and bowel function problems [2].

In people diagnosed with cancer it is recognised that smoking cessation, improved physical activity and diet have the potential to impact on treatment outcomes and cancer recurrence. A number of studies have demonstrated that higher levels of physical activity are associated with better physical functioning [3] and reduced fatigue [4]. Follow up studies report better disease free, recurrence free and overall survival in people who are more physically active [5, 6]. Intervention trials have shown that higher levels of physical activity initiated at pre-habilitation (pre surgery), post-surgery, during and after adjuvant therapies (re-habilitation) [7-9] are associated with improved cardiorespiratory fitness, muscular strength, physical functioning, quality of life, and reduced psychosocial distress.

There is growing evidence for the impact of diet on CRC cancer outcomes. A large observational study has reported that a higher level of a Western dietary intake (compared to a lower level of Westernisation) resulted in lower disease-free and overall survival rates [10]. At intervention level, a trial of dietary counselling delivered during treatment [11] showed that nutrition improvements were associated with reduced treatment related co-morbidity (radiotherapy toxicity) at **3 months** and after a mean follow up of 6 years. Three post-treatment exploratory trials [12-14] of combined lifestyle interventions have reported improved dietary behaviour, reduced fatigue, improved exercise tolerance, functional capacity and quality of life.

There is some evidence to support lifestyle interventions in the pre-surgical and post- treatment periods, but no trial has yet evaluated an intervention covering the full patient journey. Patients report confusion about appropriate lifestyle behaviours because they have received conflicting advice at different treatment stages and rarely receive personalised support in the period after treatments end and during return to normal health [15]. It has been noted that relatively few CRC patients stop smoking after diagnosis (13.7% pre-diagnosis to 9% 5 months later) [16]. Current data suggest that, in CRC patients, physical activity levels drop significantly by 6 months post-diagnosis [17]. This may reflect lack of consistent guidance from clinicians, and patient confusion over the merits of rest versus activity [15]. Similarly, for diet, misconceptions exist over body weight gain (or loss) and understanding of appropriate food selection.

There are a number of behavioural frameworks that could support lifestyle change from the start of care such as the concept of the “teachable moment” [18]. Cancer care clinicians, starting at diagnosis and throughout the cancer pathway, can be powerful advocates to help patients understand the importance of a healthy lifestyle and they have expressed interest in providing guidance [19]. Patients consider information obtained from cancer specialists to be of the best quality [20]. Despite major concerns over

1  
2  
3 their diagnosis many patients request advice on what might be done to prepare for surgery and there is a  
4 need for clinicians to identify an effective programme with the potential to improve health in the first  
5 year after diagnosis. Increasingly, asymptomatic patients are diagnosed via the national bowel screening  
6 programme which means that this patient group is less frail than those diagnosed late and have  
7 considerable potential to initiate lifestyle change. Opportunities in the “pre-habilitation” period have  
8 been highlighted in cancer strategy documents [21] but little is known about likely uptake of  
9 interventions.  
10  
11

12  
13 This study aimed to assess the practical aspects of delivering and evaluating a lifestyle intervention  
14 programme (TreatWELL) for CRC patients undergoing potentially curative treatments in order to inform  
15 the feasibility of undertaking a randomised controlled trial (RCT) to assess the clinical and cost-  
16 effectiveness of this intervention at one year after diagnosis.  
17

18  
19 Specific objectives were to assess recruitment and retention to assist in the design of a future RCT, assess  
20 the feasibility of data collection procedures, ease of programme implementation, patient acceptability,  
21 fidelity and factors influencing adherence to the intervention.  
22

## 23 **METHODS**

### 24 **Study design and setting**

25  
26 This study was a single arm, two-centre feasibility study of the TreatWELL intervention programme  
27 carried out in tertiary level teaching hospitals in Tayside, UK.  
28

### 29 **Sample size**

30  
31 We aimed to recruit 34 participants in order to be able to assess feasibility objectives and to provide data  
32 to inform the sample size required to show significant differences in health outcome variables in a fully  
33 powered RCT. These numbers were based on a pragmatic assessment of patient numbers, eligibility and  
34 participation based on a previous study undertaken with the same patient group (at post-treatment  
35 stage) in the same geographic area [13].  
36  
37

### 38 **Eligibility**

39  
40 Eligible patients were adults aged >18 years , capable of giving informed consent, considered to have  
41 stage I to III colorectal cancer, eligible for potentially curative treatment (had to be fit for major surgery).  
42 Patients who had severe cognitive impairment, emergency surgery or pre-operative neo-adjuvant therapy  
43 were excluded from the study.  
44

### 45 **Recruitment**

46  
47 Eligible patients were introduced to the study by a clinical nurse specialist (CNS) after discussing  
48 treatment and care plans following a cancer diagnosis. At this meeting the CNS introduced the study and  
49 endorsed its importance for helping to achieve lifestyle change in the pre-surgical period. Interested  
50 patients were provided with a participant information sheet, an invitation and endorsement letter from  
51 the lead CRC clinician for Tayside and a pre-paid opt-in reply slip which they could return to the research  
52 team. A research nurse (RN) then contacted patients, who had either provided their contact details to the  
53 CNS or returned the pre-paid reply slip, to discuss the study in detail and (if appropriate) make an  
54 appointment to obtain written informed consent and take baseline measurements. This appointment was  
55  
56  
57  
58  
59



held at the referring hospital or the participant's home if a hospital location was reported as a barrier to participation.

### Intervention

The TreatWELL intervention programme aimed to facilitate collaboratively agreed behaviour changes towards achieving and maintaining smoking cessation, increased physical activity (to at least 150 minutes moderate intensity activity per week), caloric intake appropriate to weight status and a nutrient dense diet. All goals were consistent with the American Cancer Society and World Cancer Research Fund guidance for cancer survivors [22, 23]. The behavioural approaches were informed by two main theoretical frameworks: self-regulatory theory [24] and the health action process approach [25].

Following baseline measures consented patients' contact details were passed to a Lifestyle Coach (LC) who then commenced the TreatWELL personalised intervention. The LCs had a nursing background, experience with cancer patient management and underwent a 3 day bespoke training programme covering smoking cessation, increasing moderate physical activity, brief interventions on alcohol and weight management (post-surgical and post treatment). The intervention was delivered via three face-to-face contacts (one per intervention phase and a minimum of 9 phone calls) supported by written literature and a range of behavioural techniques.

- Phase 1 Pre-habitation to start within 3-10 days of diagnosis to surgery
- Phase 2 Surgical recovery to start 1 day post-op and aim to complete within 21 days
- Phase 3 Post-surgical / adjuvant therapy recovery to start 21 days post-op for 25 weeks

The total intervention period comprised 31 weeks although duration was flexible as it was based on the individual's treatment regimen. Decisions about phase completion (e.g. defining the end of post-surgical recovery) and progression was agreed in conjunction with the CNS. At each phase of the programme, personalised, specific goals were identified with a focus on two health behaviours that were selected as a priority for that individual (e.g. smoking, physical activity). All participants were invited to engage a support person (e.g. spouse) to assist in their adherence with the programme. (Appendix 1).

Participants were encouraged to develop personalised action and coping plans. Activities (e.g. brisk walking) were demonstrated and tried by participants. Access to an equipment tool kit (pedometers, resistance bands and DVDs) was also offered. Emphasis was placed on self-monitoring and goal setting, e.g. physical activity through pedometers, with weekly feedback in the first week of each phase. In phase 2, participants were encouraged to commence activity in accordance with ability, their post-op condition and guidance from their health care team. In Phase 3, the participant's Phase 1 plan was repeated and expanded to include an emphasis on core strength, mobility and functional ability, with a strict protocol for referral to a physiotherapist if there were any safety concerns.

In phase 1, advice for participants not at risk of malnutrition ( $BMI > 20 \text{ kg/m}^2$ ) focused on avoiding weight gain and increasing nutrient quality of their diet in line with the Department of Health Eatwell guide [26]. Participants were also advised about decreasing alcohol intake, as appropriate. No energy prescription was set in phase 1. In phase 2 and initially in phase 3, nutrition advice focused on symptom management (e.g. anorexia, vomiting and bowel problems) and worked towards achieving a nutrient dense diet. In the later stage of phase 3, all participants ( $BMI > 20 \text{ kg/m}^2$ ) were given personalised guidance on a nutrient dense diet and avoidance of excess weight gain. Participants with a  $BMI > 25 \text{ kg/m}^2$  were advised on

1  
2  
3 avoidance of weight gain and modest weight reduction (>5% weight loss) using a personalised energy  
4 prescription goal. Communications emphasised the concept of building resilience through the combined  
5 approach of increasing muscle mass (through physical activity) and decreasing excess body fat (through  
6 caloric reduction). The importance of regular self-weighing was stressed and feedback provided at each  
7 telephone consultation.  
8  
9

10 Informed by behaviour change techniques used in previous interventions [27] and the behaviour change  
11 wheel [28], a range of evidence-based behavioural techniques were employed to motivate and support  
12 lifestyle change. These included motivational interviewing, formation of specific implementation  
13 intentions, self-monitoring, personalised action and coping plans, feedback and re-enforcement.  
14  
15

### 16 **Measurements**

17 The research nurses prospectively collected details on socio-demographic background, clinical  
18 information (including tumour stage and site), type of surgery, stoma status, medications and details of  
19 adjuvant treatments.  
20

### 21 **Primary Outcome Measures**

22 Recruitment and retention were assessed from research nurse records. Information on reasons why  
23 patients were ineligible or choose not to participate were recorded with patient consent.  
24

25 Programme implementation (by LCs) was estimated from a structured pro-forma completed after every  
26 patient contact which recorded actual values or scaled ratings on:  
27

- 28 • Intervention start time (days after diagnosis)
- 29 • Total contact time
- 30 • Ease or difficulty of implementing the session
- 31 • Perceived fidelity to the intervention content
- 32 • Extent of patient engagement, receptivity and motivation
- 33
- 34

35 Achieved measurements (by RNs) were recorded at baseline and the end of each phase of the study.  
36

37 Participants views on acceptability of the intervention and factors influencing adherence were assessed  
38 by in-depth qualitative interviews transcribed and analysed using a thematic framework approach.  
39 Participants (n=10), stratified by degree of engagement with the intervention, were invited for interview  
40 at the end of phase 2 and another 10 participants at the end of phase 3.  
41  
42

### 43 **Secondary outcome measures**

44 Anthropometric measures were taken as follows:  
45

- 46 • Body weight measured with the participant wearing indoor clothing and no shoes, using a  
47 calibrated Seca 877 digital scale.
- 48 • Height measured with a Seca Leicester portable stadiometer.
- 49 • Body mass index (BMI) was calculated – weight (kg)/height (m)<sup>2</sup>.
- 50 • Waist circumference measured with a Seca 201 measuring tape, with the participant in the  
51 standing position and the tape positioned midway between the lateral lower rib margin and the  
52 iliac crest. If these landmarks could not be identified, the measurement was taken at the level of  
53 the umbilicus. Two measurements were taken post-exhalation and the mean recorded.  
54  
55  
56  
57  
58  
59

1  
2  
3 Smoking status was self-reported and alcohol intake was measured using 7 day alcohol recall [29] – units  
4 of alcohol consumed per week and number of alcohol free days per week were noted.  
5

6 Dietary intake was measured using the dietary instrument for nutrition education (DINE) questionnaire  
7 [30].  
8

9 Physical activity was assessed using the International Physical Activity Questionnaire [IPAQ] short form  
10 [31] and the 6 minute walk test [32].  
11

12 Health outcomes of interest were explored - fatigue was measured using the multidimensional fatigue  
13 inventory (MFI-20) [33] and physical function and quality of life by the EORTC GLQ C30 Quality of Life  
14 questionnaire for bowel cancer patients and the EORTC GLQ C29 Quality of Life questionnaire for  
15 colorectal cancer patients [34]. Bowel function was assessed by the Low Anterior Resection Syndrome  
16 Score (LARS) [35].  
17  
18

### 19 **Data analysis**

20 Descriptive statistics allowed characterisation of the cohort. Outcome measures were assessed for  
21 completeness but no statistical analysis was undertaken given the small sample which was not powered  
22 to show definitive results.  
23  
24

25 Data from proformas completed by the LC were analysed by descriptive statistics (mean  $\pm$  SD) to estimate  
26 completeness of delivery and areas for improvement, and to provide contextual information (including  
27 NHS service issues) on patient engagement.  
28

29 All participant interviews were recorded, transcribed and analysed using a thematic framework approach  
30 to explore patients' views on recruitment and delivery acceptability, patient engagement with the  
31 intervention, and likely facilitators and barriers to conducting a full RCT.  
32  
33  
34  
35  
36  
37  
38  
39  
40  
41  
42  
43  
44  
45  
46  
47  
48  
49  
50  
51  
52  
53  
54  
55  
56  
57  
58  
59  
60

## RESULTS

### Recruitment and retention

Over the 7 month recruitment period (01.04.14 to 31.10.14) the number of patients diagnosed and recorded with colorectal cancer was 84 and 22 (26%) were recruited to the study (Figure 1). Of the remainder, 17 were ineligible, unfit or not approached to participate and 45 declined to take part, the most common reason was the extra burden of the study. The median age of non-participants was 74 (range 44 to 90 years) and 49% were male (Table 1). Of the 22 who were recruited, 15 (68%) completed the study (Figure 2). The main reason for drop out at all stages was major ill health.

**Table 1 Baseline demographic and clinical characteristics by completion<sup>#</sup>**

|                                                    | Recruited<br>n=22 | Completed<br>n=15 | Dropped out/lost<br>to follow up<br>n=7 |
|----------------------------------------------------|-------------------|-------------------|-----------------------------------------|
| Male Gender                                        | 17 (77%)          | 11 (73%)          | 6 (86%)                                 |
| Age: Median (LQ, UQ)                               | 67.0 (60.0, 74.3) | 66.0 (60.0, 72.0) | 75.0 (64.0, 80.0)                       |
| Baseline BMI (kg/m <sup>2</sup> ): Median (LQ, UQ) | 28.3 (25.5, 33.5) | 28.6 (26.1, 33.6) | 25.8 (24.1, 32.6)                       |
| <b>SIMD Category*</b>                              |                   |                   |                                         |
| 1-3 (most affluent?)                               | 5 (23%)           | 4 (27%)           | 1 (14%)                                 |
| 4-7                                                | 10 (45%)          | 7 (46%)           | 3 (43%)                                 |
| 8-10 (most deprived?)                              | 7 (32%)           | 4 (27%)           | 3 (43%)                                 |
| <b>Smoking Status</b>                              |                   |                   |                                         |
| current                                            | 2 (9%)            | 1 (7%)            | 1 (14%)                                 |
| ex-smoker                                          | 14 (64%)          | 10 (67%)          | 4 (57%)                                 |
| never smoked                                       | 6 (27%)           | 4 (26%)           | 2 (28%)                                 |
| <b>Treatments</b>                                  |                   |                   |                                         |
| Chemotherapy & radiotherapy                        | 3 (14%)           | 2 (13%)           | 1 (14%)                                 |
| Chemotherapy only                                  | 6 (27%)           | 5 (33%)           | 1 (14%)                                 |
| No oncology                                        | 10 (45%)          | 8 (53%)           | 2 (29%)                                 |
| Palliative care                                    | 3 (14%)           | 0 (0%)            | 3 (43%)                                 |
| <b>Cancer staging</b>                              |                   |                   |                                         |
| Duke A                                             | 3 (14%)           | 3 (20%)           | 0 (0%)                                  |
| Duke B                                             | 6 (27%)           | 3 (20%)           | 3 (42%)                                 |
| Duke C                                             | 8 (36%)           | 6 (40%)           | 2 (29%)                                 |
| Squamous cell carcinoma                            | 2 (9%)            | 2 (13%)           | 0 (0%)                                  |
| Well differentiated neuroendocrine                 | 1 (5%)            | 1 (7%)            | 0 (0%)                                  |
| Metastases                                         | 2 (9%)            | 0 (0%)            | 2 (29%)                                 |

<sup>#</sup> All results are n (%) unless stated otherwise

\*SIMD Scottish Index of Multiple Deprivation

### Programme Implementation

The median time in phase 1 (pre-habilitation) was 15 days. The median time in phase 2 was 36.5 days and phase 3 was 102 days but was frequently extended by clinical problems due to health status post-surgery, treatment responses and pre-existing co-morbidities. Table 2 illustrates the significant and varied challenges experienced by individual participants during the recovery phase. Many patients did not have sufficient time in phase 3 (prior to project end) to enable secondary outcomes to be reliably assessed.

**Table 2 Summary of participants' clinical progress during the TreatWELL study**

Participant completed study n= 15      Dropped out n=7

|    |                                                                                                                                                                                                                                                                                       |
|----|---------------------------------------------------------------------------------------------------------------------------------------------------------------------------------------------------------------------------------------------------------------------------------------|
| 1  | Biopsy showed advanced disease after patient had undergone baseline measures and the phase 1 LC intervention visit. Patient excluded from further study measures.                                                                                                                     |
| 2  | Surgery as planned but poor postoperative recovery and discharged to a continuing care unit. Intravenous (IV) chemotherapy started after discharge home followed by oral chemotherapy and radiotherapy. Waiting for stoma reversal. All phases of study completed.                    |
| 3  | Surgery as planned. Slow recovery post-surgery and on parenteral nutrition. No adjuvant therapies required. Discharged home with carers twice a day, walking with a Zimmer frame. May have further surgery and did not progress beyond phase 2 in study. Seen at peripheral hospital. |
| 4  | Surgery as planned. No adjuvant therapies required. Became worried about recurrence after discharge and had to have psychological support. Hip pain re-started in phase 3. Lung metastases and heart failure diagnosed. Dropped out during phase 3. Patient died.                     |
| 5  | Surgery as planned. No adjuvant therapies required. All study phases completed.                                                                                                                                                                                                       |
| 6  | Short phase 1. Emergency surgery to de-function bowel (stoma formation). Successful chemotherapy and radiotherapy before main surgery. Phases 2 and 3 switched round for this participant. All study phases completed.                                                                |
| 7  | Surgery as planned then admission to high dependency unit post-operatively. Discharged but re-admitted for further surgery and stoma formation. Chemotherapy given. All study phases completed.                                                                                       |
| 8  | Surgery performed. Further surgery performed for removal of residual tumour. Stoma reversed. No adjuvant therapies required. All study phases completed.                                                                                                                              |
| 9  | Biopsy showed advanced disease after patient had undergone baseline measures. Patient not going ahead for surgery and excluded from further study measures.                                                                                                                           |
| 10 | Surgery as planned and chemotherapy. Admitted with diabetic ketoacidosis but diabetes since resolved. Slow recovery. Phase 1 delivered day before surgery Phase 2 and 3 of study completed.                                                                                           |
| 11 | Short phase 1. Surgery performed. No adjuvant therapies required.. Completed phase 2 and 3 of the study.                                                                                                                                                                              |
| 12 | Phase 1 delivered day before surgery. Surgery performed. Chemotherapy commenced early due to cancellation in clinic and completed. Phase 2 completed. Wife has health issues which prevented him completing phase 3.                                                                  |
| 13 | Surgery as planned, No adjuvant therapies required. All phases of study completed. Home visits.                                                                                                                                                                                       |
| 14 | Surgery as planned and chemotherapy started after surgery. All study phases completed. Seen at peripheral hospital.                                                                                                                                                                   |
| 15 | Surgery as planned and no chemotherapy required. All phases of study completed (short phase 1).Home visits.                                                                                                                                                                           |
| 16 | Surgery as planned, No adjuvant therapies required. All phases of study completed. Home visits.                                                                                                                                                                                       |

|    |                                                                                                                                                                                                                 |
|----|-----------------------------------------------------------------------------------------------------------------------------------------------------------------------------------------------------------------|
| 17 | Surgery as planned. Oral chemotherapy after surgery. All phases of study completed.                                                                                                                             |
| 18 | For de-functioning stoma and pre-surgery radiotherapy and chemotherapy. Surgery performed. Lost to follow up as still requiring intensive treatment at study end (phase 1 and 2 only).                          |
| 19 | Surgery as planned but re-admitted. Slow recovery from surgery with significant complications. Phase1, 2 and 3. Dropped out of study during phase 3 as felt back to normal and did not require further support. |
| 20 | No phase 1 undertaken. Surgery as planned, long post-operative recovery. No adjuvant therapies required. Phase 2 and 3 of study completed.                                                                      |
| 21 | Surgery performed. No adjuvant therapies required. All phases of study completed. Home visits.                                                                                                                  |
| 22 | Phase 1 delivered day before surgery. Surgery performed. Chemotherapy required. Phases 2 and 3 of study completed.                                                                                              |

Total median intervention delivery by lifestyle counsellors was 5 hrs 29 mins. LCs reported that patient engagement was high, with 93-100% being at least “fairly engaged” at all stages. Similarly the LCs reported that participants were receptive and interested in the information being delivered.

LCs rated participants as at least “fairly motivated” to improve diet and physical activity levels. During the immediate recovery stage (phase 2) LCs were most likely to report goal setting for diet and PA as “neither easy nor difficult” (73% and 64% for diet and PA respectively). At the phase 3a time point, LCs rated the ease of goal setting more favourably, with 46% of consultations described as “easy” to set dietary goals and 82% for PA.

### Achieved Measurements

Baseline measures were completed on all participants, except in four cases, where the 6 minute walk test had to be excluded due to lack of space in the participant’s home. Only 6 out of 33 participants were seen at the end of phase 1 due to the difficulty in fitting in visits prior to surgery. All participants remaining in the study were seen at the end of phase 2, but it was not possible to carry out all anthropometric measurements and walking tests at this point. Walking tests were not possible at the end of phase 3. Questionnaire data were generally well completed however some participants were reluctant to answer sexual function questions (LARS questionnaire) in all phases.

### Factors affecting protocol adherence

The LCs reported that they were able to cover most of the intervention components during phase 1 (78% delivery), 3a (73% delivery) and 3b (90% delivery). However, during the post-surgical phase (phase 2), LCs reported difficulties with access to patients. Lifestyle counselling was reported as most challenging during visits 1 (first contact) and 2 (immediately post-surgery). Delivery became more comfortable towards the end, with LCs reporting 70% of the final sessions as “fairly easy” (compared with 39% in Phase 1 and 46% in Phase 2).

The major challenges of intervention delivery reported by the LCs were:

- The short time between diagnosis and surgery

- Participants identifying time to fit in the baseline and intervention visits in addition to diagnostic and treatment preparation schedules
- Seeing patients in phase 2 (short period)
- Difficulties identifying the transition from end of phase 2 and start of phase 3
- Poor clinical progress (some patients were readmitted)
- Due to complications a longer treatment period was required which extended phase 3 beyond the project life
- Mixed messages from NHS staff and TreatWELL LCs

### **Participants views on acceptability**

Of 20 participants who completed phase 2, 14 were invited for interview, 3 declined and 11 participated (7 men and 4 women), with a mean age of  $66 \pm 6$  (range 57 to 75) years. Interviewees were from a range of areas of deprivation.

Most participants recalled that they had been recruited around the time of their diagnosis. For some, this timing appeared to have facilitated participation, as the study offered a potentially beneficial experience on which to focus, taking their mind off their diagnosis and concerns for the future. Several were reassured by the endorsement of colorectal consultants. Generally, the amount of contact, and the balance between visits and telephone calls, appeared acceptable, and the provision of home visits was particularly appreciated. Some appeared a little apprehensive about the prospect of 'going it alone' at the end of the study but they recognised that its end signalled another milestone in their recovery. Participants spoke positively of LCs and felt that LCs had been able to move them gently into doing things they might have been reluctant to do. Some hinted that they had relied on the counsellor for wider emotional support.

The PA advice appeared to have been particularly salient, with most participants being able to describe their PA goals and targets. Pedometers were felt to have been very helpful. Some described having become so fixed on their PA goals that they "over-did things", but most felt that the advice had encouraged them to be more active and to "push" themselves more than they might otherwise have done. Participants generally felt that they had managed to take on board the diet advice, although some had struggled with cutting out 'treats'.

A number of facilitators and barriers to engagement were identified. Prior enjoyment of walking and previous experience of weight loss programmes were both beneficial, as were supportive family members who encouraged adherence to healthy eating and sometimes participated in activity along with the participant. Receiving a diagnosis of cancer was a major motivator for adherence. Participants were determined to overcome their diagnosis and quickly regain their health, not least for significant others. Similarly, participants were motivated to make changes in order to put themselves in the best condition for surgery and to optimise their recovery. One woman was motivated to maintain a healthy weight during her stay in hospital by witnessing fellow patients who were overweight struggling with their mobility. Monitoring progress especially with regard to levels of PA also provided motivation and some enjoyment for participants.

A main factor which negatively affected adherence to the intervention was participants' physical health. Some participants felt too unwell to increase PA, although this was alleviated for some by building

1  
2  
3 strength gradually, whilst others described comorbidities hampering their attempts to be physically  
4 active.  
5

6 Some clinical staff were reported to have advised participants to gain weight by eating whatever they  
7 liked and by not discouraging unhealthier foods, in direct contrast to TreatWELL. This inconsistency  
8 caused confusion, and participants reported following the advice of clinical staff. Participants also  
9 highlighted that NHS staff had little awareness of TreatWELL and appeared to provide little  
10 encouragement. More generally, it was noted that nursing staff did not encourage patients to get up and  
11 move on the ward.  
12  
13

## 14 **Secondary Outcomes**

15  
16 There was no change in smoking habits – one of the two smokers at baseline was lost to follow-up and  
17 the other smoker continued to smoke. The number of participants who reported consuming alcohol  
18 decreased between baseline and end of phase 3 although in some individuals intake increased. PA data  
19 shows a positive trend towards increased activity overall. For the 15 who completed the study, minutes of  
20 physical activity nearly doubled from a median of 480 (IQ range 240 – 720) per week to 840 (IQ range 330  
21 to 1260). This was largely due to an increase in leisure time activities, but, a decrease in active time at  
22 work (few participants continued to work during the study period). Dietary data indicated no increase in  
23 total fat score but a desirable increase in fibre score. Quality of Life data indicated some increase in global  
24 health function but also increases in anxiety.  
25  
26

27 The majority of participants had excess weight (77%) and 40% were obese at baseline (Table 1). None  
28 were underweight. At the end of phase 2, body weight had decreased as expected in the post-surgical  
29 period. Despite this weight loss, no underweight individuals were detected at the end of phase 3 and the  
30 proportion with excess weight remained. The 6 minute walk test indicated no decrease in functional  
31 ability by the end of phase 3.  
32  
33

34 It should be noted however, that all secondary outcome results were obtained principally to test ability to  
35 undertake measures and are not powered to detect differences.  
36  
37

## 38 **DISCUSSION**

39 Whilst it is recognised that pre-surgical (prehab) lifestyle intervention may have significant impact on  
40 improving health outcomes in the early months following a diagnosis of colorectal cancer there is little  
41 evidence of multi-component intervention RCTs to support investment in this area. This study illustrates  
42 the complexities of delivering and evaluating such interventions and highlights issues that need to be  
43 addressed prior to progressing further work. The main findings show that it is difficult to recruit at  
44 diagnosis because of the multitude of investigations taking place, the staff's perceptions of frailty and age  
45 (although all participants were deemed fit for surgery) and the relatively short period available for  
46 recruitment, baseline data collection and intervention delivery before surgery. Phase 2 was predictably  
47 short for most patients, but longer in those who had previous illness or had developed post-surgical  
48 complications. It should be noted that because patients were recruited at diagnosis, the extent of the  
49 disease (i.e. stage) was unknown and complications were unpredictable. Many participants spent  
50 insufficient time in phase 3 (prior to study end) for the impact of the intervention to be assessed,  
51 highlighting the need for a longer study duration for final outcome measurements. The clinical pathways  
52 of participants were unpredicted and impacted on study retention. The hardest challenge in delivery was  
53 when to introduce the next phase of the intervention (phase 2 to phase 3) because many participants had  
54  
55  
56  
57  
58  
59  
60



1  
2  
3 complex journeys through treatment. These findings highlight that compliance with a strict RCT protocol  
4 for this type of intervention is likely to be difficult. Outcome measures were largely acceptable, although  
5 consideration should be given to whether the more sensitive questions on quality of life are required.  
6 Participant views suggest the intervention was largely acceptable, and that the focus on physical activity  
7 was appropriate. The high number of patients with excess body weight at study recruitment (and exit) is  
8 of concern and a future trial encompassing weight loss is likely to need long term support and follow up.  
9  
10

11 This study (to the best of our knowledge) is the first to have offered a comprehensive lifestyle  
12 intervention at diagnosis with support before, during and after treatment in patients with colorectal  
13 cancer. Although the study is small and was undertaken in a single NHS health board, the results have  
14 highlighted a wide range of issues that would need to be addressed in a full trial of a multi-component  
15 intervention. The lack of randomisation means that it is not possible to assess whether uptake to a  
16 randomised trial with control condition would be similar.  
17  
18

19 Moug et al [36] have recently reviewed 14 randomised controlled trials in this patient group and  
20 concluded that lifestyle interventions are feasible in patients with CRC. However, it is notable that there  
21 were no RCTs of tobacco and alcohol. In general, they reported variable recruitment rates but good  
22 adherence and retention (as is the case in our own study). Ravasco et al [11] have demonstrated positive  
23 outcomes in CRC patients referred for radiotherapy (irrespective of other therapies provided) after  
24 dietary counselling. However, other trials of diet and lifestyle have been focussed on patients after the  
25 end of treatment [14, 37, 38]. The challenges to conducting a trial in this patient group are similar to  
26 those described by Hubbard et al [39] in feasibility work of a pragmatic RCT for a group based  
27 rehabilitation programme for CRC survivors which reported a high likelihood of recruitment bias,  
28 potential of sub-optimal completion of outcome data, missing data and poor intervention adherence.  
29  
30

31 The current intervention approach is ambitious, but could be refined for testing in an RCT if all visits can  
32 be linked more closely with clinical appointments, measurement visits are reduced and if the clinical team  
33 were encouraged to help support lifestyle changes. Fundamentally interventions being tested should be  
34 scalable, durable and cost effective [40]. Whilst there is much practical guidance on diet and lifestyle for  
35 cancer survivors [41, 42] and interventions which have been demonstrated to be safe and feasible there  
36 remains a need for studies that can demonstrate the impact of lifestyle intervention on disease  
37 outcomes. Research in this area requires multilevel approaches with full support from health service staff  
38 (both in recruitment and support for lifestyle action), intervention staff for the delivery of tailored,  
39 personalised approaches and patient interest and advocacy.  
40  
41  
42  
43

## 44 CONCLUSIONS

45 Further work is needed to optimise recruitment and measurements. Protocols for phase 2 and 3 need to  
46 be flexible to allow for variation in clinical progress. Ways for NHS staff to support and facilitate the  
47 programme aims should be explored.  
48  
49  
50  
51  
52  
53  
54  
55  
56  
57  
58  
59  
60

## REFERENCES

1. The EUROCARE-4 database on cancer survival in Europe. Available from: <http://www.eurocare.it/Results/tabid/79/Default.aspx>. Accessed October 2017
2. Andreyev HJ, Davidson SE, Gillespie C et al. Practice guidance on the management of acute and chronic gastrointestinal problems arising as a result of treatment for cancer; *Gut* 2011 ; 61(2), 179-92.
3. Johnson BL, Trentham-Dietz A, Koltyn KF et al. Physical activity and function in older, long-term colorectal cancer survivors. *Cancer Causes & Control* 2009; 20 (5), 775-84.
4. Peddle CJ, Au HJ, Courneya KS. Associations between exercise, quality of life, and fatigue in colorectal cancer survivors. *Dis Colon Rectum* 2008; 51 (8), 1242-8.
5. Meyerhardt JA, Giovannucci EL, Holmes MD et al. Physical activity and survival after colorectal cancer diagnosis. *J Clin Oncol* 2006; 24 (22), 3527-34
- 6 Haydon AM, Macinnnis RJ, English DR et al. Effect of physical activity and body size on survival after diagnosis with colorectal cancer. *Gut* 2006; 55(1): 62-67
7. Mayo NE, Feldman L, Scott S et al. Impact of preoperative change in physical function on postoperative recovery: argument supporting prehabilitation for colorectal surgery. *Surgery* 2011; 150 (3), 505-14
8. Timmerman H, de Groot JF, Hulzebos HJ et al. Feasibility and preliminary effectiveness of preoperative therapeutic exercise in patients with cancer: a pragmatic study. *Physiother Theory Pract* (2011); 27 (2):117-24
9. Pinto BM, Papandonatos GD, Goldstein MG et al. Home-based physical activity intervention for colorectal cancer survivors; *Psychooncology* 2013;22(1):54-64
10. Meyerhardt JA, Niedzwiecki D, Hollis D et al. Association of dietary patterns with cancer recurrence and survival in patients with stage III colon cancer. *JAMA* 2008; 298(7):754-64.
11. Ravasco P, Monteiro-Grillo I, Camilo M. Individualised nutrition intervention is of major benefit to colorectal cancer patients: long term follow up of a randomized controlled trial of nutritional therapy. *Am J Clin Nutr* 2012; 96(6): 1346-53
12. Bourke L, Thompson G, Gibson DJ et al. Pragmatic lifestyle intervention in patients recovering from colon cancer: A randomized controlled pilot study. *Arch Phys Med Rehabil* 2011. 92(5): 749-755
13. Anderson AS, Caswell S, Wells M et al. "It makes you feel so full of life" LiveWell, a feasibility study of a personalised lifestyle programme for colorectal cancer survivors. *Support Care Cancer* 2010; 18(4):409-15
14. Hawkes AL, Gollschewski S, Lynch BM et al. A telephone-delivered lifestyle intervention for colorectal cancer survivors 'CanChange': a pilot study. *Psychooncology* 2009; 18 (4):449-55
15. Anderson AS, Coyle J, Steele RJC. Lifestyle issues for colorectal cancer survivors – perceived needs, beliefs and opportunities. *Support Care Cancer* 2013; 21(1):35-42

- 1  
2  
3 16. Park ER, Japuntich SJ, Rigotti NA et al. A snapshot of smokers after lung and colorectal cancer  
4 diagnosis. *Cancer* 2012; 118(12): 3153-64  
5
- 6 17. Hawkes AL, Lynch BM, Youlden DR et al. Health behaviors of Australian colorectal cancer survivors,  
7 compared with noncancer population controls. *Sup Care Can* 2008; 16 (10):1097-104.  
8
- 9 18. Demark-Wahnefried W, Aziz NM, Rowland JH et al. Riding the crest of the teachable moment:  
10 promoting long-term health after the diagnosis of cancer. *J Clin Oncol* 2005; 23 (24): 5814-30.  
11
- 12 19. Anderson AS, Caswell S, Wells M et al. Obesity and lifestyle advice in colorectal cancer survivors - How  
13 well are clinicians prepared? *Colorectal Dis* 2013; 15(8):949-57  
14
- 15 20. Mills ME, Davidson R. Cancer patients' sources of information: use and quality issues. *Psychooncology*  
16 2002; Sep-Oct; 11 (5):371-8  
17
- 18 21. Department of Health (2013). National Cancer Survivorship Initiative (NCSI). Living with and beyond  
19 Cancer: Taking Action to Improve Outcomes  
20 [https://www.gov.uk/government/uploads/system/uploads/attachment\\_data/file/181054/9333-TSO-](https://www.gov.uk/government/uploads/system/uploads/attachment_data/file/181054/9333-TSO-2900664-NCSI_Report_FINAL.pdf)  
21 [2900664-NCSI\\_Report\\_FINAL.pdf](https://www.gov.uk/government/uploads/system/uploads/attachment_data/file/181054/9333-TSO-2900664-NCSI_Report_FINAL.pdf). Accessed October 2017  
22
- 23 22. World Cancer Research Fund International (WCRF), Cancer Prevention Recommendations.  
24 <http://www.wcrf.org/int/research-we-fund/cancer-prevention-recommendations/cancer-survivors>  
25 Accessed October 2017  
26
- 27 23. Rock CL, Doyle C, Demark-Wahnefried W, et al. Nutrition and physical activity guidelines for cancer  
28 survivors. *CA Cancer J Clin* 2012;62(4):243-274.  
29
- 30 24. Leventhal H, Leventhal EA, Breland JY. Cognitive science speaks to the "common-sense" of chronic  
31 illness management. *Ann Behav Med* 2011; 41: 152-63 doi: 10.1007/s12160-010-9246-9.  
32
- 33 25. Schwarzer R. Modeling health behaviour change: how to predict and modify the adoption and  
34 maintenance of health behaviors. *Appl Psychol* 2008; 57:1–29.  
35
- 36 26. Public Health England, The Eatwell Guide. [https://www.gov.uk/government/publications/the-eatwell-](https://www.gov.uk/government/publications/the-eatwell-guide)  
37 [guide](https://www.gov.uk/government/publications/the-eatwell-guide). Accessed October 2017  
38
- 39 27. Michie, S., Richardson, M., Johnston, M., Abraham, C., Francis, J., Hardeman, W., et al. (2013). The  
40 Behavior Change Technique Taxonomy (v1) of 93 Hierarchically Clustered Techniques: Building an  
41 International Consensus for the Reporting of Behavior Change Interventions. *Annals of Behavioral*  
42 *Medicine*, 46(1), 81–95.  
43
- 44 28. Michie S, van Stralen MM, West R. The behaviour change wheel: a new method for characterising and  
45 designing behaviour change interventions. *Implement Sci* 2011; 6(1): 42. doi:10.1186/1748-5908-6-42  
46
- 47 29. Emslie C, Lewars H, Batty GD et al. Are there gender differences in levels of heavy, binge and problem  
48 drinking? Evidence from three generations in the west of Scotland. *Public Health* 2009;123(1): 12-4.  
49
- 50 30. Roe L, Strong C, Whiteside C et al. Dietary Intervention in Primary-Care: Validity of the Dine Method  
51 for Diet Assessment. *Fam Pract* 1994; 11(4):375-81.  
52  
53  
54  
55  
56  
57  
58  
59

- 1  
2  
3 31. Craig CL, Marshall AL, Sjöström M et al. International physical activity questionnaire: 12-country  
4 reliability and validity. *Med Sci Sports Exerc* 2003; 35(8): 1381-95.or SPAQ [www.dapa-](http://www.dapa-toolkit.mrc.ac.uk/documents/en/SPA/SPAQ.pdf)  
5 [toolkit.mrc.ac.uk/documents/en/SPA/SPAQ.pdf](http://www.dapa-toolkit.mrc.ac.uk/documents/en/SPA/SPAQ.pdf)  
6  
7 32 Butland RJ, Pang J, Gross ER et al. Two-, six-, and 12-minute walking tests in respiratory disease. *BMJ*  
8 *Med J (Clin Res Ed)* 1982; 284(6329):1607–1608.  
9  
10 33 EORTC Quality of Life Department, QLQ-C30 questionnaire <http://groups.eortc.be/qol/eortc-qlq-c30>  
11 Accessed October 2017  
12  
13 34 Smets EM, Garssen B, Bonke B et al. The Multidimensional Fatigue Inventory (MFI) psychometric  
14 qualities of an instrument to assess fatigue. *J Psychosom Res* 1995; 39 (3), 315–325  
15  
16 35 Emmertsen KJ, Laurberg S. Low anterior resection syndrome score: development and validation of a  
17 symptom-based scoring system for bowel dysfunction after low anterior resection for rectal cancer. *Ann*  
18 *Surg* 2012; 255 (5): 922- 928  
19  
20 36 Moug SJ, Bryce A, Mutrie N et al. Lifestyle interventions are feasible in patients with colorectal cancer  
21 with potential short-term health benefits: a systematic review. *Int J Colorectal Dis* 2017; 32(6):765-775.  
22 doi: 10.1007/s00384-017-2797-5.  
23  
24 37 Campbell MK, Carr C, Devellis B et al. A randomized trial of tailoring and motivational interviewing to  
25 promote fruit and vegetable consumption for cancer prevention and control. *Ann Behav Med* 2009;  
26 38(2):71–85  
27  
28 38 Morey MC, Snyder DC, Sloane R et al. Effects of home-based diet and exercise on functional outcomes  
29 among older, overweight long-term cancer survivors: RENEW: a randomized controlled trial. *JAMA* 2009;  
30 301(18):1883–1891  
31  
32 39 T Hubbard G, O'carroll R, Munro J, Mutrie N, Haw S, Mason H, Treweek S The feasibility and  
33 acceptability of trial procedures for a pragmatic randomised controlled trial of a structured physical  
34 activity intervention for people diagnosed with colorectal cancer: findings from a pilot trial of cardiac  
35 rehabilitation versus usual care (no rehabilitation) with an embedded qualitative study. *Pilot and*  
36 *Feasibility Studies* 2016 2:51  
37  
38 40 Practical clinical interventions for diet, physical activity, and weight control in cancer survivors.  
39 Demark-Wahnefried W, Rogers LQ, Alfano CM et al. *CA Cancer J Clin* 2015; ;65(3):167-89. doi:  
40 10.3322/caac.21265.  
41  
42 41 World Cancer Research Fund (WCRF), Cancer Prevention recommendations-People living with and  
43 beyond cancer. [https://www.wcrf-uk.org/uk/preventing-cancer/cancer-prevention-](https://www.wcrf-uk.org/uk/preventing-cancer/cancer-prevention-recommendations/people-living-and-beyond-cancer)  
44 [recommendations/people-living-and-beyond-cancer](https://www.wcrf-uk.org/uk/preventing-cancer/cancer-prevention-recommendations/people-living-and-beyond-cancer) Accessed October 2017  
45  
46 42 American Cancer Society. [https://www.cancer.org/treatment/survivorship-during-and-after-](https://www.cancer.org/treatment/survivorship-during-and-after-treatment/staying-active/nutrition/nutrition-and-physical-activity-during-and-after-cancer-treatment.html)  
47 [treatment/staying-active/nutrition/nutrition-and-physical-activity-during-and-after-cancer-](https://www.cancer.org/treatment/survivorship-during-and-after-treatment/staying-active/nutrition/nutrition-and-physical-activity-during-and-after-cancer-treatment.html)  
48 [treatment.html](https://www.cancer.org/treatment/survivorship-during-and-after-treatment/staying-active/nutrition/nutrition-and-physical-activity-during-and-after-cancer-treatment.html) Accessed October 2017  
49  
50  
51  
52  
53  
54  
55  
56  
57  
58  
59  
60

1  
2  
3  
4  
5  
6  
7  
8  
9  
10  
11  
12  
13  
14  
15  
16  
17  
18  
19  
20  
21  
22  
23  
24  
25  
26  
27  
28  
29  
30  
31  
32  
33  
34  
35  
36  
37  
38  
39  
40  
41  
42  
43  
44  
45  
46  
47  
48  
49  
50  
51  
52  
53  
54  
55  
56  
57  
58  
59  
60

For peer review only

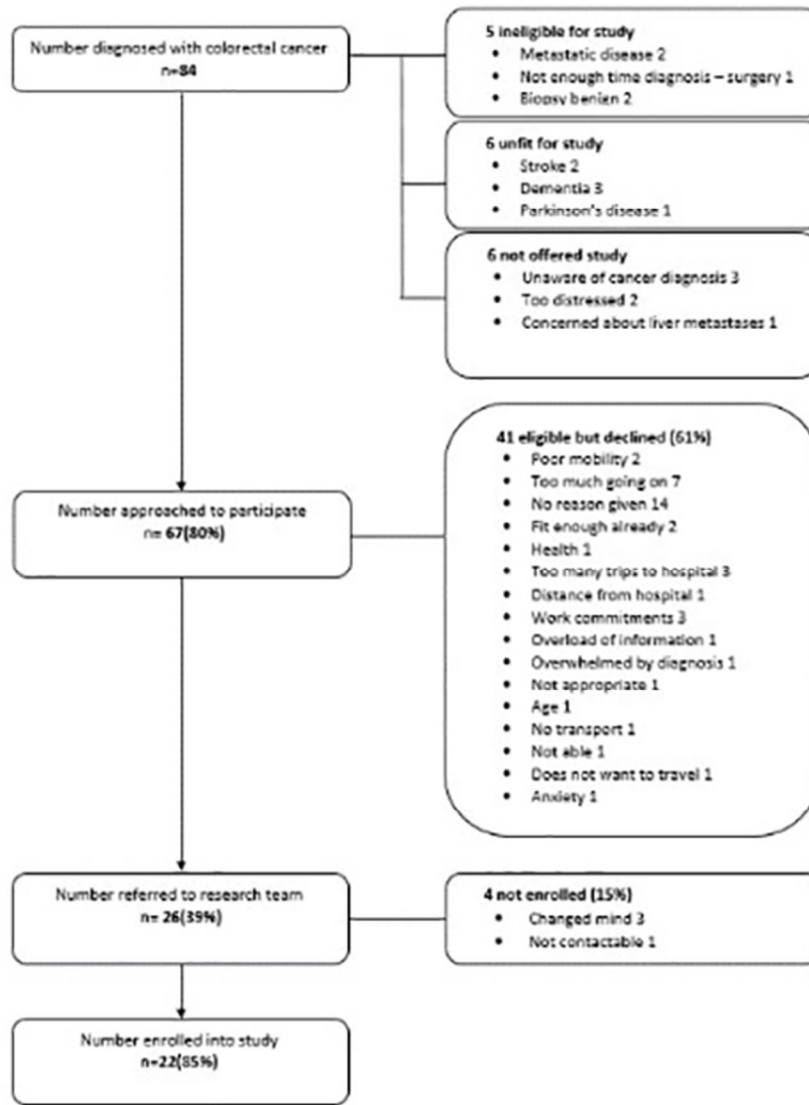

Figure 1 TreatWELL recruitment CONSORT flowchart

46x64mm (300 x 300 DPI)

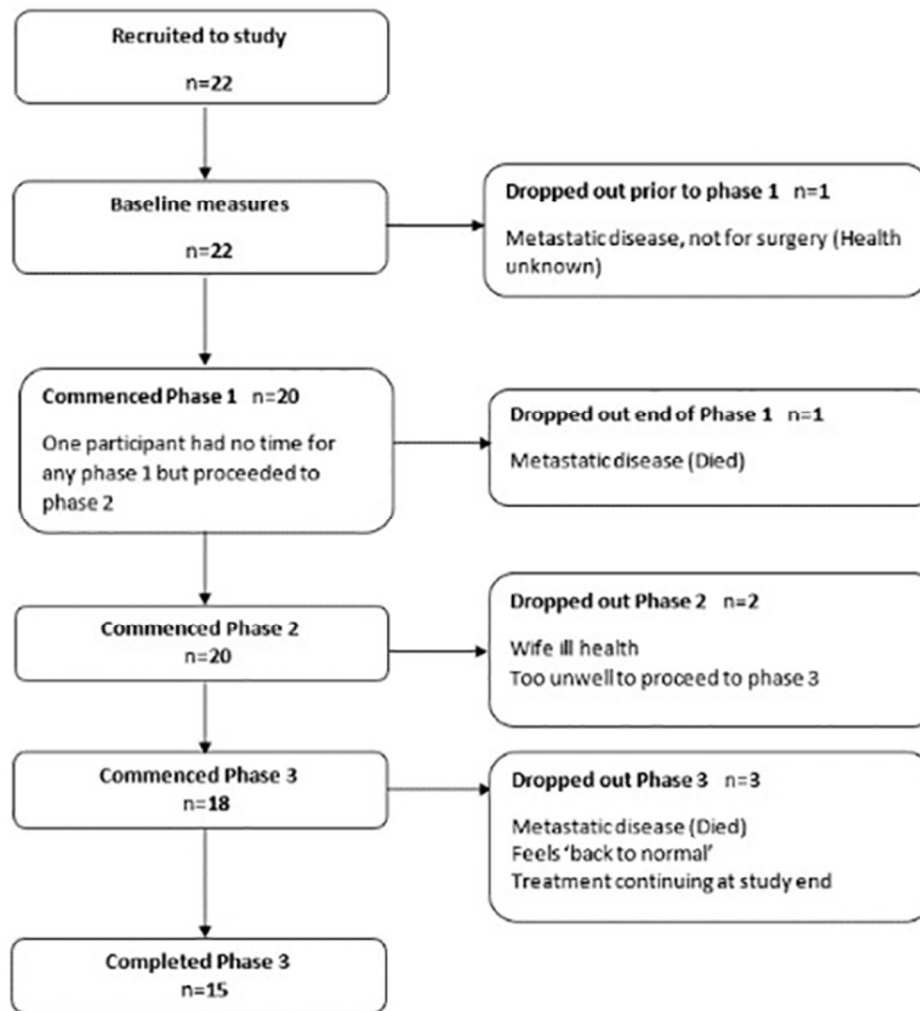

Figure 2 TreatWELL study progression CONSORT flowchart

55x59mm (300 x 300 DPI)

## Appendix 1 TreatWELL intervention delivery plan and resources

### Phase 1 Prehabilitation

#### **a) Delivery mode:**

Face to face study consultation visit 1 (1 hour) (hospital/research centre). All participants were encouraged to bring a support friend/family member

#### **Consultation Focus:**

Getting fit for surgery

- Education and endorsement on smoking, alcohol, physical activity, fruit and vegetables (FAV))

#### **Resources:**

- Fast track smoking cessation card
- Leaflet *How to stop smoking and stay stopped* booklet
- AUDIT alcohol assessment
- NHS Scotland alcohol booklet: *Making a Change*
- Macmillan DVD and booklet on physical activity
- DoH physical activity guidelines
- Pedometer

#### **Behaviour change techniques**

- Motivational Interviewing questions
- Goal setting for 2 health behaviours (smoking, alcohol, physical activity, diet, FAV)
- Implementation Intentions (smoking, alcohol, physical activity, FAV)
- Self-monitoring (activity diary)

AND Telephone home calls (1 to 2) 10-15 minutes (home)

### Phase 2 Surgical Recovery

#### **a) Delivery mode:**

Brief face to face support meeting (10- 15 min; in hospital ward)

#### **Consultation Focus:**

Recovery and continuing support

- Consistent with Enhanced Recovery After Surgery protocol (ERAS)
- Support about relevant post-operative physical activity
- Education and endorsement about diet (regular meals, sugary drinks, FAV)
- Advice offered on smoking and alcohol as appropriate

#### **Resources:**

- Bowel Cancer UK booklets: *Eating and Drinking During Treatment, Fibre after Bowel Cancer* (as appropriate),
- Phase 2 activity diary

#### **Behaviour change techniques**

### Phase 2 (early phase 3)

#### **b) Delivery mode:**

Brief telephone/ward contacts 10-15 minutes

#### **Consultation Focus:**

Recovery and continuing support

- 1<sup>st</sup> visit/call Supportive for managing goals
- 2<sup>nd</sup> visit/call Responding to queries about diet, physical activity, alcohol, smoking



Phase-3 Post surgical/adjuvant therapy/ recovery**a) Delivery mode:**

Face to face consultation study visit 2 (1 hour; hospital/ research centre)

| <b>Participants not on chemotherapy</b>                                                                                                                                                                                                                                                                                                                                                                                                                                                                                                                                                                                                                                                                                                                                                                                                                                                                                                        | <b>Participants on Chemotherapy</b>                                                                                                                                                                                                                                                                                                                                                                                                                                                                                                                                                                                                                                                                                     |
|------------------------------------------------------------------------------------------------------------------------------------------------------------------------------------------------------------------------------------------------------------------------------------------------------------------------------------------------------------------------------------------------------------------------------------------------------------------------------------------------------------------------------------------------------------------------------------------------------------------------------------------------------------------------------------------------------------------------------------------------------------------------------------------------------------------------------------------------------------------------------------------------------------------------------------------------|-------------------------------------------------------------------------------------------------------------------------------------------------------------------------------------------------------------------------------------------------------------------------------------------------------------------------------------------------------------------------------------------------------------------------------------------------------------------------------------------------------------------------------------------------------------------------------------------------------------------------------------------------------------------------------------------------------------------------|
| Visit takes place start of phase 3                                                                                                                                                                                                                                                                                                                                                                                                                                                                                                                                                                                                                                                                                                                                                                                                                                                                                                             | Visit takes place half way through chemotherapy                                                                                                                                                                                                                                                                                                                                                                                                                                                                                                                                                                                                                                                                         |
| <p><b>Consultation Focus:</b><br/>A new start</p> <ul style="list-style-type: none"> <li>• Diet, Keep active (walk and talk),</li> <li>• Management of weight</li> </ul> <p><b>Resources:</b></p> <ul style="list-style-type: none"> <li>• Eatwell plate</li> <li>• 7 day food and drink diary</li> <li>• Booklet: <i>Thinking about becoming more active?</i></li> <li>• 12 week activity diary</li> <li>• Resistance bands</li> <li>• NHS Tayside information <i>Helping you manage your weight</i></li> <li>• Information about personalised weight management</li> <li>• Bowel Cancer UK booklet: <i>Losing Weight Safely</i></li> <li>• Weight awareness plan</li> </ul> <p><b>Behaviour Change techniques</b></p> <ul style="list-style-type: none"> <li>• Goal setting for two health behaviours physical activity, smoking, alcohol, diet</li> <li>• Implementation intentions</li> <li>• Self-monitoring (body weight log)</li> </ul> | <p><b>Consultation Focus</b><br/>A new start</p> <ul style="list-style-type: none"> <li>• Diet, Keep active (walk and talk),</li> <li>• Introduce weight management concepts</li> </ul> <p><b>Resources:</b></p> <ul style="list-style-type: none"> <li>• Eatwell plate</li> <li>• 7 day food and drink diary</li> <li>• Booklet: <i>Thinking about becoming more active?</i></li> <li>• 12 week activity diary</li> <li>• Resistance bands</li> </ul> <p><b>Behaviour Change techniques</b></p> <ul style="list-style-type: none"> <li>• Goal setting for two health behaviours physical activity, smoking, alcohol, diet</li> <li>• Implementation intentions</li> <li>• Self-monitoring (body weight log)</li> </ul> |

Face to face consultation study visit 3 (1 hour; hospital/research centre)

| <b>Participants with no chemotherapy</b>                                                                                                                                                                                                                                                                                                                                                                                                                      | <b>Chemotherapy</b>                                                                                                                                                                                                                                                                                                                                                                                                                                                                                                                                                                                                                                                                                                                |
|---------------------------------------------------------------------------------------------------------------------------------------------------------------------------------------------------------------------------------------------------------------------------------------------------------------------------------------------------------------------------------------------------------------------------------------------------------------|------------------------------------------------------------------------------------------------------------------------------------------------------------------------------------------------------------------------------------------------------------------------------------------------------------------------------------------------------------------------------------------------------------------------------------------------------------------------------------------------------------------------------------------------------------------------------------------------------------------------------------------------------------------------------------------------------------------------------------|
| Scheduled 4 weeks post consultation study visit 2                                                                                                                                                                                                                                                                                                                                                                                                             | Visit takes place at end of chemotherapy                                                                                                                                                                                                                                                                                                                                                                                                                                                                                                                                                                                                                                                                                           |
| <p><b>Consultation Focus:</b></p> <ul style="list-style-type: none"> <li>• “Future planning”</li> <li>• Education and endorsement on healthy eating,</li> <li>• Reinforce physical activity advice</li> </ul> <p><b>Resources:</b></p> <ul style="list-style-type: none"> <li>• <i>TREATWELL Getting active and eating well after Bowel Cancer treatment</i></li> <li>• Calories and alcohol information</li> </ul> <p><b>Behaviour Change techniques</b></p> | <p><b>Consultation Focus:</b></p> <ul style="list-style-type: none"> <li>• “Future planning”</li> <li>• Management of weight</li> <li>• Education and endorsement on healthy eating</li> <li>• Reinforce physical activity advice</li> </ul> <p><b>Resources:</b></p> <ul style="list-style-type: none"> <li>• NHS Tayside information <i>Helping you manage your weight</i></li> <li>• Information about personalised weight management</li> <li>• Bowel Cancer UK booklet: <i>Losing Weight Safely</i></li> <li>• Weight awareness plan</li> <li>• <i>TREATWELL Getting active and eating well after Bowel Cancer treatment</i></li> <li>• Calories and alcohol information</li> </ul> <p><b>Behaviour Change techniques</b></p> |

And up to 8 Brief telephone calls 10-15 minutes at home

# BMJ Open

## A feasibility study to assess the delivery of a lifestyle intervention (TreatWELL) for colorectal cancer patients undergoing potentially curative treatment.

|                                 |                                                                                                                                                                                                                                                                                                                                                                                                                                                                                                                                                                                                                                                                                                                                                                                                                                                                                                                                                                                                                                                                                                                                                    |
|---------------------------------|----------------------------------------------------------------------------------------------------------------------------------------------------------------------------------------------------------------------------------------------------------------------------------------------------------------------------------------------------------------------------------------------------------------------------------------------------------------------------------------------------------------------------------------------------------------------------------------------------------------------------------------------------------------------------------------------------------------------------------------------------------------------------------------------------------------------------------------------------------------------------------------------------------------------------------------------------------------------------------------------------------------------------------------------------------------------------------------------------------------------------------------------------|
| Journal:                        | <i>BMJ Open</i>                                                                                                                                                                                                                                                                                                                                                                                                                                                                                                                                                                                                                                                                                                                                                                                                                                                                                                                                                                                                                                                                                                                                    |
| Manuscript ID                   | bmjopen-2017-021117.R1                                                                                                                                                                                                                                                                                                                                                                                                                                                                                                                                                                                                                                                                                                                                                                                                                                                                                                                                                                                                                                                                                                                             |
| Article Type:                   | Research                                                                                                                                                                                                                                                                                                                                                                                                                                                                                                                                                                                                                                                                                                                                                                                                                                                                                                                                                                                                                                                                                                                                           |
| Date Submitted by the Author:   | 13-Feb-2018                                                                                                                                                                                                                                                                                                                                                                                                                                                                                                                                                                                                                                                                                                                                                                                                                                                                                                                                                                                                                                                                                                                                        |
| Complete List of Authors:       | <p>Macleod, Maureen; University of Dundee, Centre for Research into Cancer Prevention and Screening, Division of Cancer Research</p> <p>Steele, Robert; University of Dundee, Centre for Research into Cancer Prevention and Screening, Division of Cancer Research</p> <p>O'carroll, Ronan; University of Stirling, Division of Psychology. School of Natural Sciences</p> <p>Wells, Mary; University of Stirling, NMAHP Research Unit</p> <p>campbell, anna; EDinburgh Napier UNiversity, School of life sciences, sport and social sciences</p> <p>Sugden, Jacqui; University of Dundee, Centre for Research into Cancer Prevention and Screening, Division of Cancer Research</p> <p>Rodger, Jackie; University of Dundee, Centre for Research into Cancer Prevention and Screening, Division of Cancer Research</p> <p>Stead, Martine; University of Stirling and the Open University, Institute for Social Marketing</p> <p>McKell, Jennifer; University of Stirling, Institute for Social Marketing</p> <p>Anderson, Annie; University of Dundee, Centre for Research into Cancer Prevention and Screening, Division of Cancer Research</p> |
| <b>Primary Subject Heading</b>: | Oncology                                                                                                                                                                                                                                                                                                                                                                                                                                                                                                                                                                                                                                                                                                                                                                                                                                                                                                                                                                                                                                                                                                                                           |
| Secondary Subject Heading:      | Patient-centred medicine                                                                                                                                                                                                                                                                                                                                                                                                                                                                                                                                                                                                                                                                                                                                                                                                                                                                                                                                                                                                                                                                                                                           |
| Keywords:                       | Prehabilitation, Lifestyle intervention, Colorectal cancer                                                                                                                                                                                                                                                                                                                                                                                                                                                                                                                                                                                                                                                                                                                                                                                                                                                                                                                                                                                                                                                                                         |
|                                 |                                                                                                                                                                                                                                                                                                                                                                                                                                                                                                                                                                                                                                                                                                                                                                                                                                                                                                                                                                                                                                                                                                                                                    |

SCHOLARONE™  
Manuscripts

1  
2  
3  
4 **A FEASIBILITY STUDY TO ASSESS THE DELIVERY OF A LIFESTYLE INTERVENTION (TREATWELL) FOR**  
5 **COLORECTAL CANCER PATIENTS UNDERGOING POTENTIALLY CURATIVE TREATMENT.**  
6  
7

8  
9 **Authors**

10 Maureen Macleod<sup>1</sup>, Robert JC Steele<sup>1</sup>, Ronan E O'Carroll<sup>2</sup>, Mary Wells<sup>3</sup>, Anna Campbell<sup>4</sup>, Jacqui Sugden<sup>1</sup>,  
11 Jackie Rodger<sup>1</sup>, Martine Stead<sup>5</sup>, Jennifer McKell<sup>5</sup> Annie S Anderson<sup>1</sup>  
12  
13

14  
15 **Addresses**

- 16  
17  
18 1. Centre for Research into Cancer Prevention and Screening, Division of Cancer Research,  
19 University of Dundee, Level 7, Ninewells Hospital & Medical School, Dundee DD1 9SY, UK  
20 [m.macleod@dundee.ac.uk](mailto:m.macleod@dundee.ac.uk); [r.j.c.steele@dundee.ac.uk](mailto:r.j.c.steele@dundee.ac.uk); [J.A.Sugden@dundee.ac.uk](mailto:J.A.Sugden@dundee.ac.uk) ;  
21 [jackierodger@nhs.net](mailto:jackierodger@nhs.net); [a.s.anderson@dundee.ac.uk](mailto:a.s.anderson@dundee.ac.uk)  
22  
23 2. Division of Psychology, School of Natural Sciences, University of Stirling, Stirling, FK9 4LA, UK  
24 [ronan.ocarroll@stir.ac.uk](mailto:ronan.ocarroll@stir.ac.uk)  
25  
26 3. Nursing, Midwifery and Allied Health Professions Research Unit, University of Stirling, Stirling FK9  
27 4LA  
28 [mary.wells@stir.ac.uk](mailto:mary.wells@stir.ac.uk)  
29  
30 4. Department Sport Exercise and Health Science, School of Applied Science, Edinburgh Napier  
31 University, Edinburgh EH11 4BN  
32 [anna.campbell@napier.ac.uk](mailto:anna.campbell@napier.ac.uk)  
33  
34 5. Institute for Social Marketing, University of Stirling, Stirling FK9 4LA, Scotland, UK  
35 [martine.stead@stir.ac.uk](mailto:martine.stead@stir.ac.uk) [j.e.mckell@stir.ac.uk](mailto:j.e.mckell@stir.ac.uk)  
36  
37  
38  
39  
40  
41  
42

43 **Correspondence to:**

44 Professor Annie S. Anderson  
45 Centre for Research into Cancer Prevention and Screening  
46 Level 7, Mailbox 7,  
47 Ninewells Medical School  
48 University of Dundee  
49 Dundee DD1 9SY  
50

51 Tel: 0044 (0)1382 383299 Fax: 0044 (0)1382 632333 E mail: [a.s.anderson@dundee.ac.uk](mailto:a.s.anderson@dundee.ac.uk)  
52  
53

54  
55 Word count: Abstract 299 Paper 5373  
56  
57  
58  
59  
60

**ABSTRACT**

**Objectives** To assess the feasibility of delivering and evaluating a lifestyle programme for colorectal cancer patients undergoing potentially curative treatments.

**Study design** Non-randomised feasibility trial

**Setting** NHS Tayside

**Participants** Adults with stage I - III colorectal cancer

**Intervention** The programme targeted smoking, alcohol, physical activity, diet and weight management. It was delivered in 3 face-to-face counselling sessions (plus 9 phone calls) by lifestyle coaches over three phases (1 - pre-surgery, 2 - surgical recovery and 3 - post treatment recovery).

**Primary outcome** Feasibility measures (recruitment, retention, programme implementation, achieved measures, fidelity, factors affecting protocol adherence and acceptability).

**Secondary outcomes** Measured changes in body weight, waist circumference, walking and self-reported physical activity, diet, smoking and alcohol intake, fatigue, bowel function and Quality of Life (QoL).

**Results** Of 84 patients diagnosed, 22 (26%) were recruited and 15 (18%) completed the study. Median time for intervention delivery was 5.5 hours. Coaches reported covering most (>70%) of the intervention components but had difficulties during phase 2. Evaluation measures (except walk test) were achieved by all participants at baseline, and most (<90%) at end of phase 2 and phase 3, but <20% at end of phase 1. Protocol challenges included limited time between diagnosis and surgery and the presence of co-morbidities. The intervention was rated highly by participants but limited support from NHS staff was noted. The majority of participants (77%) had a BMI >25kg/m<sup>2</sup> and none were underweight. Physical activity data showed a positive trend towards increased activity overall but no other changes in secondary outcomes were detected.

**Conclusions** To make this intervention feasible for testing as a full trial, further research is required on a) recruitment optimisation b) appropriate assessment tools c) protocols for phase 2 and 3 which can build in flexibility and d) ways for NHS staff to facilitate the program.

**Trial registration number** ISRCTN 52345929

## STRENGTHS AND LIMITATIONS

- This feasibility study is the first to have offered a comprehensive lifestyle intervention programme at diagnosis with support before, during and after treatment in patients with colorectal cancer.
- The study highlights the wide range of variables that need to be considered in designing a future randomised controlled trial (including recruitment and support from NHS staff, complexities of patient health status and time required for permissions, assessment and interventions).
- The lack of randomisation means it is not possible to estimate uptake to a randomised controlled trial.
- The work was undertaken in a single NHS health board and may not be representative of other treatment centres.

## COMPETING INTEREST STATEMENT

All authors have completed the ICMJE uniform disclosure form at [www.icmje.org/coi\\_disclosure.pdf](http://www.icmje.org/coi_disclosure.pdf) and declare: no support from any organisation for the submitted work other than the Chief Scientist Office who funded the award, no financial relationships with any organisations that might have an interest in the submitted work in the previous three years, no other relationships or activities that could appear to have influenced the submitted work.

## ETHICS, CONSENTS AND PERMISSIONS

Ethical approval was provided by the East of Scotland Research Ethics Service, REC reference no. 13/ES/0153. All participants provided written, informed consent.

## FUNDING

Funding for this study was provided by the Chief Scientist Office (CZH/4/939). The funders played no part in the design, execution or decision to publish this research.

## AUTHORS' CONTRIBUTION

All authors have made substantial contributions to the study conception and design, and the development and editing of the manuscript. MM led initial study design and development, assisted with data collection, carried out the analyses and drafted the initial draft manuscript; RJCS had the initial concept and led initial study design and development; RO'C led the fidelity assessments (development and analyses) and provided guidance on project progression; MW had the initial concept and led initial study design and development; AC contributed to study design; JS carried out the day to day management of the study and led the data collection; JR contributed to study design; MS and JMCK led on qualitative assessments (development and analyses); ASA had the initial concept and led initial study design and development, contributed to data analyses and had oversight of the study.

All authors have read, edited and approved the manuscript for publication.

## ACKNOWLEDGEMENTS

We would like to thank the participants of this study, lifestyle coaches Catherine Savage and Carol Baird and the study administrator Jill Hampton who arranged the interviews and FGDs.

**DATA SHARING**

Technical appendix, statistical code, and dataset available from the authors on request.

For peer review only

## INTRODUCTION

Colorectal cancer (CRC) survival has improved in the last decade due to earlier diagnosis and new treatments but, in Scotland, survivors still have notable excess mortality within the **first year post diagnosis** compared to other European countries [1]. Survivors also have a high rate of pre-existing co-morbidities and treatment related symptoms. The latter are experienced by 15% undergoing colonic surgery, 33% with rectal surgery, 50% of those with chemo-radiation therapy and 66% of patients undergoing short course radiotherapy. These symptoms include fatigue, physical discomfort and bowel function problems [2].

In people diagnosed with cancer it is recognised that smoking cessation, improved physical activity and diet have the potential to impact on treatment outcomes and cancer recurrence. A number of studies have reported that higher levels of physical activity are associated with better physical functioning [3] and reduced fatigue [4] although further work is needed in this area [5]. Follow up studies report better disease free, recurrence free and overall survival in people who are more physically active [6, 7]. Intervention trials have shown that higher levels of physical activity initiated at pre-habilitation (pre surgery), post-surgery, during and after adjuvant therapies (rehabilitation) [8-10] are associated with improved cardiorespiratory fitness, muscular strength, physical functioning, quality of life, and reduced psychosocial distress.

There is growing evidence for the impact of diet on CRC cancer outcomes [11]. A large observational study has reported that a higher level of a Western dietary intake (compared to a lower level of Westernisation) resulted in lower disease-free and overall survival rates [12]. At intervention level, a trial of dietary counselling delivered during treatment [13] showed that nutrition improvements were associated with reduced treatment related co-morbidity (radiotherapy toxicity) at **3 months** and after a mean follow up of 6 years. Three post-treatment exploratory trials [14-16] of combined lifestyle interventions have reported improved dietary behaviour, reduced fatigue, improved exercise tolerance, functional capacity and quality of life.

There is some evidence to support lifestyle interventions in the pre-surgical and post- treatment periods, but no trial has yet evaluated an intervention covering the full patient journey. Patients report confusion about appropriate lifestyle behaviours because they have received conflicting advice at different treatment stages and rarely receive personalised support in the period after treatments end and during return to normal health [17]. It has been noted that relatively few CRC patients stop smoking after diagnosis (13.7% pre-diagnosis to 9% 5 months later) [18]. Current data suggest that, in CRC patients, physical activity levels drop significantly by 6 months post-diagnosis [19]. This may reflect lack of consistent guidance from clinicians, and patient confusion over the merits of rest versus activity [20]. Similarly, for diet, misconceptions exist over body weight gain (or loss) and understanding of appropriate food selection.

There are a number of behavioural frameworks that could support lifestyle change from the start of care such as the concept of the “teachable moment” [21]. Cancer care clinicians, starting at diagnosis and throughout the cancer pathway, can be powerful advocates to help patients understand the importance of a healthy lifestyle and they have expressed interest in providing guidance [22]. Patients consider

1  
2  
3 information obtained from cancer specialists to be of the best quality [20]. Despite major concerns over  
4 their diagnosis many patients request advice on what might be done to prepare for surgery and there is a  
5 need for clinicians to identify an effective programme with the potential to improve health in the first  
6 year after diagnosis. Increasingly, asymptomatic patients are diagnosed via the national bowel screening  
7 programme which means that this patient group is less frail than those diagnosed late and have  
8 considerable potential to initiate lifestyle change. Opportunities in the “pre-habilitation” period have  
9 been highlighted in cancer strategy documents [23] but little is known about likely uptake of  
10 interventions.  
11  
12  
13

14 This study aimed to assess the practical aspects of delivering and evaluating a lifestyle intervention  
15 programme (TreatWELL) for CRC patients undergoing potentially curative treatments in order to inform  
16 the feasibility of undertaking a randomised controlled trial (RCT) to assess the clinical and cost-  
17 effectiveness of this intervention at one year after diagnosis.  
18  
19

20 Specific objectives were to assess recruitment and retention to assist in the design of a future RCT, assess  
21 the feasibility of data collection procedures, ease of programme implementation, patient acceptability,  
22 fidelity and factors influencing adherence to the intervention.  
23  
24

## 25 **METHODS**

### 26 **Study design and setting**

27 This study was a single arm, two-centre feasibility study of the TreatWELL intervention programme  
28 carried out in tertiary level teaching hospitals in Tayside, UK.  
29  
30

### 31 **Sample size**

32 We aimed to recruit 34 participants in order to be able to assess feasibility objectives and to provide data  
33 to inform the sample size required to show significant differences in health outcome variables in a fully  
34 powered RCT. These numbers were based on a pragmatic assessment of patient numbers, eligibility and  
35 participation based on a previous study undertaken with the same patient group (at post-treatment  
36 stage) in the same geographic area [15].  
37  
38

### 39 **Eligibility**

40 Eligible patients were adults aged >18 years , capable of giving informed consent, considered to have  
41 stage I to III colorectal cancer, eligible for potentially curative treatment (had to be fit for major surgery).  
42 Patients who had severe cognitive impairment, emergency surgery or pre-operative neo-adjuvant therapy  
43 were excluded from the study.  
44  
45

### 46 **Recruitment**

47 Eligible patients were introduced to the study by a clinical nurse specialist (CNS) after discussing  
48 treatment and care plans following a cancer diagnosis. At this meeting the CNS introduced the study and  
49 endorsed its importance for helping to achieve lifestyle change in the pre-surgical period. Interested  
50 patients were provided with a participant information sheet, an invitation and endorsement letter from  
51 the lead CRC clinician for Tayside and a pre-paid opt-in reply slip which they could return to the research  
52 team. A research nurse (RN) then contacted patients, who had either provided their contact details to the  
53 CNS or returned the pre-paid reply slip, to discuss the study in detail and (if appropriate) make an  
54  
55  
56  
57  
58  
59



1  
2  
3 appointment to obtain written informed consent and take baseline measurements. This appointment was  
4 held at the referring hospital or the participant's home if a hospital location was reported as a barrier to  
5 participation.  
6

## 8 **Intervention**

9 The TreatWELL intervention programme aimed to facilitate collaboratively agreed behaviour changes  
10 towards achieving and maintaining smoking cessation, increased physical activity (to at least 150 minutes  
11 moderate intensity activity per week), caloric intake appropriate to weight status and a nutrient dense  
12 diet. All goals were consistent with the American Cancer Society and World Cancer Research Fund  
13 guidance for cancer survivors [24, 25]. The behavioural approaches were informed by two main  
14 theoretical frameworks: self-regulatory theory [26] and the health action process approach [27].  
15

16  
17 Following baseline measures consented patients' contact details were passed to a Lifestyle Coach (LC)  
18 who then commenced the TreatWELL personalised intervention. The LCs had a nursing background,  
19 experience with cancer patient management and underwent a 3 day bespoke training programme  
20 covering smoking cessation, increasing moderate physical activity, brief interventions on alcohol and  
21 weight management (post-surgical and post treatment). The intervention was delivered via three face-to-  
22 face contacts (one per intervention phase and a minimum of 9 phone calls) supported by written  
23 literature and a range of behavioural techniques.  
24

- 25
- 26 • Phase 1 Pre-habitation to start within 3-10 days of diagnosis to surgery
- 27 • Phase 2 Surgical recovery to start 1 day post-op and aim to complete within 21 days
- 28 • Phase 3 Post-surgical / adjuvant therapy recovery to start 21 days post-op for 25 weeks
- 29

30  
31 The total intervention period comprised 31 weeks although duration was flexible as it was based on the  
32 individual's treatment regimen. The delivery mode, consultation focus, resources and behaviour change  
33 techniques used in each phase are presented in Appendix 1. Decisions about phase completion (e.g.  
34 defining the end of post-surgical recovery) and progression was agreed in conjunction with the CNS. In  
35 summary, each phase of the programme comprised verbal educational approaches with written  
36 resources (e.g. booklets, resistance bands) and the use of behavioural techniques. Importantly,  
37 personalised, specific action goals were identified with a focus on two health behaviours that were  
38 selected as a priority for that individual (e.g. smoking, physical activity). All participants were invited to  
39 engage a support person (e.g. spouse) to assist in their adherence with the programme. It should be  
40 noted that the protocol for phase 3 varied according to whether chemo therapy use. For patients with no  
41 adjuvant therapy, the progression to addressing body weight issues (over, under weight and weight loss)  
42 was addressed at the start of this phase. For participants undergoing chemotherapy the focus on diet and  
43 weight management was delayed to avoid any confusion which might arise with dietary issues related to  
44 treatment side effects (e.g. nausea).  
45

46  
47 Participants were encouraged to develop personalised action and coping plans. Activities (e.g. brisk  
48 walking) were demonstrated and tried by participants. Access to an equipment tool kit (pedometers,  
49 resistance bands and DVDs) was also offered. Emphasis was placed on self-monitoring and goal setting,  
50 e.g. physical activity through pedometers, with weekly feedback in the first week of each phase. In phase  
51 2, participants were encouraged to commence activity in accordance with ability, their post-op condition  
52 and guidance from their health care team. In Phase 3, the participant's Phase 1 plan was repeated and  
53  
54  
55  
56  
57  
58  
59

1  
2  
3 expanded to include an emphasis on core strength, mobility and functional ability, with a strict protocol  
4 for referral to a physiotherapist if there were any safety concerns.  
5

6 In phase 1, advice for participants not at risk of malnutrition ( $\text{BMI} > 20 \text{ kg/m}^2$ ) focused on avoiding weight  
7 gain and increasing nutrient quality of their diet in line with the Department of Health Eatwell guide [28].  
8 Participants were also advised about decreasing alcohol intake, as appropriate. No energy prescription  
9 was set in phase 1. In phase 2 and initially in phase 3, nutrition advice focused on symptom management  
10 (e.g. anorexia, vomiting and bowel problems) and worked towards achieving a nutrient dense diet. In the  
11 later stage of phase 3, all participants ( $\text{BMI} > 20 \text{ kg/m}^2$ ) were given personalised guidance on a nutrient  
12 dense diet and avoidance of excess weight gain. Participants with a  $\text{BMI} > 25 \text{ kg/m}^2$  were advised on  
13 avoidance of weight gain and modest weight reduction ( $> 5\%$  weight loss) using a personalised energy  
14 prescription goal. Communications emphasised the concept of building resilience through the combined  
15 approach of increasing muscle mass (through physical activity) and decreasing excess body fat (through  
16 caloric reduction). The importance of regular self-weighing was stressed and feedback provided at each  
17 telephone consultation.  
18  
19  
20

21 Informed by behaviour change techniques used in previous interventions [29] and the behaviour change  
22 wheel [30], a range of evidence-based behavioural techniques were employed to motivate and support  
23 lifestyle change. These included motivational interviewing, formation of specific implementation  
24 intentions, self-monitoring, personalised action and coping plans, feedback and re-enforcement.  
25  
26

### 27 **Measurements**

28 The research nurses prospectively collected details on socio-demographic background, clinical  
29 information (including tumour stage and site), type of surgery, stoma status, medications and details of  
30 adjuvant treatments.  
31

### 32 **Primary Outcome Measures**

33 Recruitment and retention were assessed from research nurse records. Information on reasons why  
34 patients were ineligible or choose not to participate were recorded with patient consent.  
35  
36

37 Programme implementation (by LCs) was estimated from a structured pro-forma completed after every  
38 patient contact which recorded actual values or scaled ratings on:  
39

- 40 • Intervention start time (days after diagnosis)
- 41 • Total contact time
- 42 • Ease or difficulty of implementing the session
- 43 • Perceived fidelity to the intervention content
- 44 • Extent of patient engagement, receptivity and motivation
- 45

46 Achieved measurements (by RNs) were recorded at baseline and the end of each phase of the study.  
47

48 Participants' views on acceptability of the intervention and factors influencing adherence were explored  
49 in in-depth qualitative interviews conducted by MS and JMCK. Interviews were scheduled for around 45-  
50 60 minutes and were conducted either face to face or by telephone. Interviews were digitally recorded  
51 with participants' consent, and transcribed verbatim for analysis. The original intention was to interview a  
52 random sample of one in three participants at the end of phase 2 and another at the end of phase 3.  
53 However, because of the low number of participants everyone was invited to take part in an interview  
54 towards the end of their journey through the intervention programme.  
55  
56  
57  
58  
59

## Secondary outcome measures

Anthropometric measures were taken as follows:

- Body weight measured with the participant wearing indoor clothing and no shoes, using a calibrated Seca 877 digital scale.
- Height measured with a Seca Leicester portable stadiometer.
- Body mass index (BMI) was calculated – weight (kg)/height (m)<sup>2</sup>.
- Waist circumference measured with a Seca 201 measuring tape, with the participant in the standing position and the tape positioned midway between the lateral lower rib margin and the iliac crest. If these landmarks could not be identified, the measurement was taken at the level of the umbilicus. Two measurements were taken post-exhalation and the mean recorded.

Smoking status was self-reported and alcohol intake was measured using 7 day alcohol recall [31] – units of alcohol consumed per week and number of alcohol free days per week were noted.

Dietary intake was measured using the dietary instrument for nutrition education (DINE) questionnaire [32].

Physical activity was assessed using the International Physical Activity Questionnaire [IPAQ] short form [33] and the 6 minute walk test [34].

Health outcomes of interest were explored - fatigue was measured using the multidimensional fatigue inventory (MFI-20) [35] and physical function and quality of life by the EORTC GLQ C30 Quality of Life questionnaire for bowel cancer patients and the EORTC GLQ C29 Quality of Life questionnaire for colorectal cancer patients [36]. Bowel function was assessed by the Low Anterior Resection Syndrome Score (LARS) [37].

## Data analysis

Descriptive statistics allowed characterisation of the cohort. Outcome measures were assessed for completeness but no statistical analysis was undertaken given the small sample which was not powered to show definitive results.

Data from proformas completed by the LC were analysed by descriptive statistics (mean ± SD) to estimate completeness of delivery and areas for improvement, and to provide contextual information (including NHS service issues) on patient engagement.

Data from the transcripts were coded by MS and JMck using a framework approach [38], with an initial framework developed around different aspects of engagement in the study and intervention: recruitment and delivery acceptability, engagement with lifestyle change, facilitators and barriers to lifestyle change, and any issues which would need to be considered if conducting a full RCT. The framework was revised to incorporate additional themes which emerged from the transcripts (for example, concerning PA goals and conflicting advice given by other health professionals).

## RESULTS

### Recruitment and retention

Over the 7 month recruitment period (01.04.14 to 31.10.14) the number of patients diagnosed and recorded with colorectal cancer was 84 and 22 (26%) were recruited to the study (Figure 1). Of the remainder, 17 were ineligible, unfit or not approached to participate and 45 declined to take part, the most common reason was the extra burden of the study. The median age of non-participants was 74 (range 44 to 90 years) and 49% were male (Table 1). Of the 22 who were recruited, the mean age was 67 years and 77% were male. In total 15 (68%) completed the study (Figure 2). The main reason for drop out at all stages was major ill health.

**Table 1 Baseline demographic and clinical characteristics by completion<sup>#</sup>**

|                                                    | Recruited<br>n=22 | Completed<br>n=15 | Dropped out/lost<br>to follow up<br>n=7 |
|----------------------------------------------------|-------------------|-------------------|-----------------------------------------|
| Male Gender                                        | 17 (77%)          | 11 (73%)          | 6 (86%)                                 |
| Age: Median (LQ, UQ)                               | 67.0 (60.0, 74.3) | 66.0 (60.0, 72.0) | 75.0 (64.0, 80.0)                       |
| Baseline BMI (kg/m <sup>2</sup> ): Median (LQ, UQ) | 28.3 (25.5, 33.5) | 28.6 (26.1, 33.6) | 25.8 (24.1, 32.6)                       |
| SIMD Category*                                     |                   |                   |                                         |
| 1-3 (most affluent?)                               | 5 (23%)           | 4 (27%)           | 1 (14%)                                 |
| 4-7                                                | 10 (45%)          | 7 (46%)           | 3 (43%)                                 |
| 8-10 (most deprived?)                              | 7 (32%)           | 4 (27%)           | 3 (43%)                                 |
| Smoking Status                                     |                   |                   |                                         |
| current                                            | 2 (9%)            | 1 (7%)            | 1 (14%)                                 |
| ex-smoker                                          | 14 (64%)          | 10 (67%)          | 4 (57%)                                 |
| never smoked                                       | 6 (27%)           | 4 (26%)           | 2 (28%)                                 |
| Treatments                                         |                   |                   |                                         |
| Chemotherapy & radiotherapy                        | 3 (14%)           | 2 (13%)           | 1 (14%)                                 |
| Chemotherapy only                                  | 6 (27%)           | 5 (33%)           | 1 (14%)                                 |
| No oncology                                        | 10 (45%)          | 8 (53%)           | 2 (29%)                                 |
| Palliative care                                    | 3 (14%)           | 0 (0%)            | 3 (43%)                                 |
| Cancer staging                                     |                   |                   |                                         |
| Duke A                                             | 3 (14%)           | 3 (20%)           | 0 (0%)                                  |
| Duke B                                             | 6 (27%)           | 3 (20%)           | 3 (42%)                                 |
| Duke C                                             | 8 (36%)           | 6 (40%)           | 2 (29%)                                 |
| Squamous cell carcinoma                            | 2 (9%)            | 2 (13%)           | 0 (0%)                                  |
| Well differentiated neuroendocrine                 | 1 (5%)            | 1 (7%)            | 0 (0%)                                  |
| Metastases                                         | 2 (9%)            | 0 (0%)            | 2 (29%)                                 |

# All results are n (%) unless stated otherwise

\*SIMD Scottish Index of Multiple Deprivation

### Programme Implementation

The median time in phase 1 (pre-habilitation) was 15 days. The median time in phase 2 was 36.5 days and phase 3 was 102 days but was frequently extended by clinical problems due to health status post-surgery, treatment responses and pre-existing co-morbidities. Table 2 illustrates the significant and varied challenges experienced by individual participants during the recovery phase. Many patients did not have sufficient time in phase 3 (prior to project end) to enable secondary outcomes to be reliably assessed.

**Table 2 Summary of participants' clinical progress during the TreatWELL study**

Participant completed study n= 15      Dropped out n=7

|    |                                                                                                                                                                                                                                                                                       |
|----|---------------------------------------------------------------------------------------------------------------------------------------------------------------------------------------------------------------------------------------------------------------------------------------|
| 1  | Biopsy showed advanced disease after patient had undergone baseline measures and the phase 1 LC intervention visit. Patient excluded from further study measures.                                                                                                                     |
| 2  | Surgery as planned but poor postoperative recovery and discharged to a continuing care unit. Intravenous (IV) chemotherapy started after discharge home followed by oral chemotherapy and radiotherapy. Waiting for stoma reversal. All phases of study completed.                    |
| 3  | Surgery as planned. Slow recovery post-surgery and on parenteral nutrition. No adjuvant therapies required. Discharged home with carers twice a day, walking with a Zimmer frame. May have further surgery and did not progress beyond phase 2 in study. Seen at peripheral hospital. |
| 4  | Surgery as planned. No adjuvant therapies required. Became worried about recurrence after discharge and had to have psychological support. Hip pain re-started in phase 3. Lung metastases and heart failure diagnosed. Dropped out during phase 3. Patient died.                     |
| 5  | Surgery as planned. No adjuvant therapies required. All study phases completed.                                                                                                                                                                                                       |
| 6  | Short phase 1. Emergency surgery to de-function bowel (stoma formation). Successful chemotherapy and radiotherapy before main surgery. Phases 2 and 3 switched round for this participant. All study phases completed.                                                                |
| 7  | Surgery as planned then admission to high dependency unit post-operatively. Discharged but re-admitted for further surgery and stoma formation. Chemotherapy given. All study phases completed.                                                                                       |
| 8  | Surgery performed. Further surgery performed for removal of residual tumour. Stoma reversed. No adjuvant therapies required. All study phases completed.                                                                                                                              |
| 9  | Biopsy showed advanced disease after patient had undergone baseline measures. Patient not going ahead for surgery and excluded from further study measures.                                                                                                                           |
| 10 | Surgery as planned and chemotherapy. Admitted with diabetic ketoacidosis but diabetes since resolved. Slow recovery. Phase 1 delivered day before surgery Phase 2 and 3 of study completed.                                                                                           |
| 11 | Short phase 1. Surgery performed. No adjuvant therapies required.. Completed phase 2 and 3 of the study.                                                                                                                                                                              |
| 12 | Phase 1 delivered day before surgery. Surgery performed. Chemotherapy commenced early due to cancellation in clinic and completed. Phase 2 completed. Wife has health issues which prevented him completing phase 3.                                                                  |
| 13 | Surgery as planned, No adjuvant therapies required. All phases of study completed. Home visits.                                                                                                                                                                                       |
| 14 | Surgery as planned and chemotherapy started after surgery. All study phases completed. Seen at peripheral hospital.                                                                                                                                                                   |
| 15 | Surgery as planned and no chemotherapy required. All phases of study completed (short phase 1).Home visits.                                                                                                                                                                           |
| 16 | Surgery as planned, No adjuvant therapies required. All phases of study completed. Home visits.                                                                                                                                                                                       |

|    |                                                                                                                                                                                                                 |
|----|-----------------------------------------------------------------------------------------------------------------------------------------------------------------------------------------------------------------|
| 17 | Surgery as planned. Oral chemotherapy after surgery. All phases of study completed.                                                                                                                             |
| 18 | For de-functioning stoma and pre-surgery radiotherapy and chemotherapy. Surgery performed. Lost to follow up as still requiring intensive treatment at study end (phase 1 and 2 only).                          |
| 19 | Surgery as planned but re-admitted. Slow recovery from surgery with significant complications. Phase1, 2 and 3. Dropped out of study during phase 3 as felt back to normal and did not require further support. |
| 20 | No phase 1 undertaken. Surgery as planned, long post-operative recovery. No adjuvant therapies required. Phase 2 and 3 of study completed.                                                                      |
| 21 | Surgery performed. No adjuvant therapies required. All phases of study completed. Home visits.                                                                                                                  |
| 22 | Phase 1 delivered day before surgery. Surgery performed. Chemotherapy required. Phases 2 and 3 of study completed.                                                                                              |

Total median intervention delivery by lifestyle counsellors was 5 hrs 29 mins. LCs reported that patient engagement was high, with 93-100% being at least “fairly engaged” at all stages. Similarly the LCs reported that participants were receptive and interested in the information being delivered.

LCs rated participants as at least “fairly motivated” to improve diet and physical activity levels. During the immediate recovery stage (phase 2) LCs were most likely to report goal setting for diet and PA as “neither easy nor difficult” (73% and 64% for diet and PA respectively). At the phase 3a time point, LCs rated the ease of goal setting more favourably, with 46% of consultations described as “easy” to set dietary goals and 82% for PA.

### Achieved Measurements

Baseline measures were completed on all participants, except in four cases, where the 6 minute walk test had to be excluded due to lack of space in the participant’s home. Only 6 out of 33 participants were seen at the end of phase 1 due to the difficulty in fitting in visits prior to surgery. All participants remaining in the study were seen at the end of phase 2, but it was not possible to carry out all anthropometric measurements and walking tests at this point. Walking tests were not possible at the end of phase 3. Questionnaire data were generally well completed however some participants were reluctant to answer sexual function questions (LARS questionnaire) in all phases.

### Factors affecting protocol adherence

The LCs reported that they were able to cover most of the intervention components during phase 1 (78% delivery), 3a (73% delivery) and 3b (90% delivery). However, during the post-surgical phase (phase 2), LCs reported difficulties with access to patients. Lifestyle counselling was reported as most challenging during visits 1 (first contact) and 2 (immediately post-surgery). Delivery became more comfortable towards the end, with LCs reporting 70% of the final sessions as “fairly easy” (compared with 39% in Phase 1 and 46% in Phase 2).

The major challenges of intervention delivery reported by the LCs were:

- The short time between diagnosis and surgery

- Participants identifying time to fit in the baseline and intervention visits in addition to diagnostic and treatment preparation schedules
- Seeing patients in phase 2 (short period)
- Difficulties identifying the transition from end of phase 2 and start of phase 3
- Poor clinical progress (some patients were readmitted)
- Due to complications a longer treatment period was required which extended phase 3 beyond the project life
- Mixed messages from NHS staff and TreatWELL LCs

### **Participants views on acceptability**

Of 20 participants who completed phase 2, 14 were invited for interview, 3 declined and 11 participated (7 men and 4 women), with a mean age of  $66 \pm 6$  (range 57 to 75) years. Interviewees were from a range of areas of deprivation.

Most participants recalled that they had been recruited around the time of their diagnosis. For some, this timing appeared to have facilitated participation, as the study offered a potentially beneficial experience on which to focus, taking their mind off their diagnosis and concerns for the future. Several were reassured by the endorsement of colorectal consultants. Generally, the amount of contact, and the balance between visits and telephone calls, appeared acceptable, and the provision of home visits was particularly appreciated. Some appeared a little apprehensive about the prospect of 'going it alone' at the end of the study but they recognised that its end signalled another milestone in their recovery. Participants spoke positively of LCs and felt that LCs had been able to move them gently into doing things they might have been reluctant to do. Some hinted that they had relied on the counsellor for wider emotional support.

The PA advice appeared to have been particularly salient, with most participants being able to describe their PA goals and targets. Pedometers were felt to have been very helpful. Some described having become so fixed on their PA goals that they "over-did things", but most felt that the advice had encouraged them to be more active and to "push" themselves more than they might otherwise have done. Participants generally felt that they had managed to take on board the diet advice, although some had struggled with cutting out 'treats'.

A number of facilitators and barriers to engagement were identified. Prior enjoyment of walking and previous experience of weight loss programmes were both beneficial, as were supportive family members who encouraged adherence to healthy eating and sometimes participated in activity along with the participant. Receiving a diagnosis of cancer was a major motivator for adherence. Participants were determined to overcome their diagnosis and quickly regain their health, not least for significant others. Similarly, participants were motivated to make changes in order to put themselves in the best condition for surgery and to optimise their recovery. One woman was motivated to maintain a healthy weight during her stay in hospital by witnessing fellow patients who were overweight struggling with their mobility. Monitoring progress especially with regard to levels of PA also provided motivation and some enjoyment for participants.

A main factor which negatively affected adherence to the intervention was participants' physical health. Some participants felt too unwell to increase PA, although this was alleviated for some by building

1  
2  
3 strength gradually, whilst others described comorbidities hampering their attempts to be physically  
4 active.  
5

6 Some clinical staff were reported to have advised participants to gain weight by eating whatever they  
7 liked and by not discouraging unhealthier foods, in direct contrast to TreatWELL. This inconsistency  
8 caused confusion, and participants reported following the advice of clinical staff. Participants also  
9 highlighted that NHS staff had little awareness of TreatWELL and appeared to provide little  
10 encouragement. More generally, it was noted that nursing staff did not encourage patients to get up and  
11 move on the ward.  
12  
13

## 14 **Secondary Outcomes**

15  
16 There was no change in smoking habits – one of the two smokers at baseline was lost to follow-up and  
17 the other smoker continued to smoke. The number of participants who reported consuming alcohol  
18 decreased between baseline and end of phase 3 although in some individuals intake increased. PA data  
19 shows a positive trend towards increased activity overall. For the 15 who completed the study, minutes of  
20 physical activity nearly doubled from a median of 480 (IQ range 240 – 720) per week to 840 (IQ range 330  
21 to 1260). This was largely due to an increase in leisure time activities, but, a decrease in active time at  
22 work (few participants continued to work during the study period). Dietary data indicated no increase in  
23 total fat score but a desirable increase in fibre score. Quality of Life data indicated some increase in global  
24 health function but also increases in anxiety.  
25  
26

27 The majority of participants had excess weight (77%) and 40% were obese at baseline (Table 1). None  
28 were underweight. At the end of phase 2, body weight had decreased as expected in the post-surgical  
29 period. Despite this weight loss, no underweight individuals were detected at the end of phase 3 and the  
30 proportion with excess weight remained. The 6 minute walk test indicated no decrease in functional  
31 ability by the end of phase 3.  
32  
33

34 It should be noted however, that all secondary outcome results were obtained principally to test ability to  
35 undertake measures and are not powered to detect differences.  
36  
37

## 38 **DISCUSSION**

39 Whilst it is recognised that pre-surgical (prehab) lifestyle intervention may have significant impact on  
40 improving health outcomes in the early months following a diagnosis of colorectal cancer there is little  
41 evidence of multi-component intervention RCTs to support investment in this area. This study illustrates  
42 the complexities of delivering and evaluating such interventions and highlights issues that need to be  
43 addressed prior to progressing further work. The main findings show that it is difficult to recruit at  
44 diagnosis because of the multitude of investigations taking place, the staff's perceptions of frailty and age  
45 (although all participants were deemed fit for surgery) and the relatively short period available for  
46 recruitment, baseline data collection and intervention delivery before surgery. It is notable that a high  
47 proportion of participants were male (77%) and whilst national data reports [39] that more men are  
48 diagnosed with colorectal cancer compared to women (54% versus 46%), the proportion in this study is  
49 higher than anticipated. The reason for this is not clear but does indicate the need to explore this in  
50 future work. Phase 2 was predictably short for most patients, but longer in those who had previous illness  
51 or had developed post-surgical complications. It should be noted that because patients were recruited at  
52 diagnosis, the extent of the disease (i.e. stage) was unknown and complications were unpredictable.  
53 Many participants spent insufficient time in phase 3 (prior to study end) for the impact of the  
54  
55  
56  
57  
58  
59  
60



1  
2  
3 intervention to be assessed, highlighting the need for a longer study duration for final outcome  
4 measurements. The clinical pathways of participants were unpredictable and impacted on study retention.  
5 The hardest challenge in delivery was when to introduce the next phase of the intervention (phase 2 to  
6 phase 3) because many participants had complex journeys through treatment. These findings highlight  
7 that compliance with a strict RCT protocol for this type of intervention is likely to be difficult. Outcome  
8 measures were largely acceptable, although consideration should be given to whether the more sensitive  
9 questions on quality of life are required. Participant views suggest the intervention was largely  
10 acceptable, and that the focus on physical activity was appropriate. The high number of patients with  
11 excess body weight at study recruitment (and exit) is of concern and a future trial encompassing weight  
12 loss is likely to need long term support and follow up.  
13  
14  
15

16 This study (to the best of our knowledge) is the first to have offered a comprehensive lifestyle  
17 intervention at diagnosis with support before, during and after treatment in patients with colorectal  
18 cancer. Although the study is small and was undertaken in a single NHS health board, the results have  
19 highlighted a wide range of issues that would need to be addressed in a full trial of a multi-component  
20 intervention. The lack of randomisation means that it is not possible to assess whether uptake to a  
21 randomised trial with control condition would be similar.  
22  
23

24 Moug et al [40] have recently reviewed 14 randomised controlled trials in this patient group and  
25 concluded that lifestyle interventions are feasible in patients with CRC. However, it is notable that there  
26 were no RCTs of tobacco and alcohol. In general, they reported variable recruitment rates but good  
27 adherence and retention (as is the case in our own study). Ravasco et al [13] have demonstrated positive  
28 outcomes in CRC patients referred for radiotherapy (irrespective of other therapies provided) after  
29 dietary counselling. However, other trials of diet and lifestyle have been focussed on patients after the  
30 end of treatment [14, 41, 42]. The challenges to conducting a trial in this patient group are similar to  
31 those described by Hubbard et al [43] in feasibility work of a pragmatic RCT for a group based  
32 rehabilitation programme for CRC survivors which reported a high likelihood of recruitment bias,  
33 potential of sub-optimal completion of outcome data, missing data and poor intervention adherence.  
34  
35

36 The current intervention approach is ambitious, but could be refined for testing in an RCT if all visits can  
37 be linked more closely with clinical appointments, measurement visits are reduced and if the clinical team  
38 were encouraged to help support lifestyle changes. Fundamentally interventions being tested should be  
39 scalable, durable and cost effective [44]. Whilst there is much practical guidance on diet and lifestyle for  
40 cancer survivors [45, 46] and interventions which have been demonstrated to be safe and feasible there  
41 remains a need for studies that can demonstrate the impact of lifestyle intervention on disease  
42 outcomes. Research in this area requires multilevel approaches with full support from health service staff  
43 (both in recruitment and support for lifestyle action), intervention staff for the delivery of tailored,  
44 personalised approaches and patient interest and advocacy.  
45  
46  
47

## 48 CONCLUSIONS

49  
50 To make this intervention feasible for testing as a full RCT, further research is required on a) recruitment  
51 optimization b) appropriate assessment tools c) protocols for phase 2 and 3 which can build in flexibility  
52 and d) ways for NHS staff to facilitate the programme.  
53  
54  
55  
56  
57  
58  
59

1  
2  
3  
4  
5  
6  
7  
8  
9  
10  
11  
12  
13  
14  
15  
16  
17  
18  
19  
20  
21  
22  
23  
24  
25  
26  
27  
28  
29  
30  
31  
32  
33  
34  
35  
36  
37  
38  
39  
40  
41  
42  
43  
44  
45  
46  
47  
48  
49  
50  
51  
52  
53  
54  
55  
56  
57  
58  
59  
60

For peer review only

1  
2  
3  
4  
5  
6  
7  
8  
9  
10  
11  
12  
13  
14  
15  
16  
17  
18  
19  
20  
21  
22  
23  
24  
25  
26  
27  
28  
29  
30  
31  
32  
33  
34  
35  
36  
37  
38  
39  
40  
41  
42  
43  
44  
45  
46  
47  
48  
49  
50  
51  
52  
53  
54  
55  
56  
57  
58  
59  
60

**Figure legend**

Figure 1 TreatWELL recruitment CONSORT flowchart

Figure 2 TreatWELL study progression CONSORT flowchart

For peer review only

## REFERENCES

1. The EURO CARE-4 database on cancer survival in Europe. Available from: <http://www.eurocare.it/Results/tabid/79/Default.aspx>. Accessed October 2017
2. Andreyev HJ, Davidson SE, Gillespie C et al. Practice guidance on the management of acute and chronic gastrointestinal problems arising as a result of treatment for cancer; *Gut* 2011 ; 61(2), 179-92.
3. Johnson BL, Trentham-Dietz A, Koltyn KF et al. Physical activity and function in older, long-term colorectal cancer survivors. *Cancer Causes & Control* 2009; 20 (5), 775-84.
4. Peddle CJ, Au HJ, Courneya KS. Associations between exercise, quality of life, and fatigue in colorectal cancer survivors. *Dis Colon Rectum* 2008; 51 (8), 1242-8.
5. Brandenbarg D., Korsten, J. H. W. M., Berger, M. Y., Berendsen, A. J. The effect of physical activity on fatigue among survivors of colorectal cancer: a systematic review and meta-analysis. *Support Care Cancer*. 2017 Doi: 10.1007/s00520-017-3920-4. [Epub ahead of print]
6. Meyerhardt JA, Giovannucci EL, Holmes MD et al. Physical activity and survival after colorectal cancer diagnosis. *J Clin Oncol* 2006; 24 (22), 3527-34
- 7 Haydon AM, Macinnnis RJ, English DR et al. Effect of physical activity and body size on survival after diagnosis with colorectal cancer. *Gut* 2006; 55(1): 62-67
8. Mayo NE, Feldman L, Scott S et al. Impact of preoperative change in physical function on postoperative recovery: argument supporting prehabilitation for colorectal surgery. *Surgery* 2011; 150 (3), 505-14
9. Timmerman H, de Groot JF, Hulzebos HJ et al. Feasibility and preliminary effectiveness of preoperative therapeutic exercise in patients with cancer: a pragmatic study. *Physiother Theory Pract* (2011); 27 (2):117-24
10. Pinto BM, Papandonatos GD, Goldstein MG et al. Home-based physical activity intervention for colorectal cancer survivors; *Psychooncology* 2013;22(1):54-64
11. Van Blarigan EL & Meyerhardt JA (2015) Role of physical activity and diet after colorectal cancer. *J Clin Oncol* 1;33 (16) 1825-34
12. Meyerhardt JA, Niedzwiecki D, Hollis D et al. Association of dietary patterns with cancer recurrence and survival in patients with stage III colon cancer. *JAMA* 2008; 298(7):754-64.
13. Ravasco P, Monteiro-Grillo I, Camilo M. Individualised nutrition intervention is of major benefit to colorectal cancer patients: long term follow up of a randomized controlled trial of nutritional therapy. *Am J Clin Nutr* 2012; 96(6): 1346-53
14. Bourke L, Thompson G, Gibson DJ et al. Pragmatic lifestyle intervention in patients recovering from colon cancer: A randomized controlled pilot study. *Arch Phys Med Rehabil* 2011. 92(5): 749-755
15. Anderson AS, Caswell S, Wells M et al. "It makes you feel so full of life" LiveWell, a feasibility study of a personalised lifestyle programme for colorectal cancer survivors. *Support Care Cancer* 2010; 18(4):409-15

- 1  
2  
3 16. Hawkes AL, Gollschewski S, Lynch BM et al. A telephone-delivered lifestyle intervention for colorectal  
4 cancer survivors 'CanChange': a pilot study. *Psychooncology* 2009; 18 (4):449-55  
5  
6 17. Anderson AS, Coyle J, Steele RJC. Lifestyle issues for colorectal cancer survivors – perceived needs,  
7 beliefs and opportunities. *Support Care Cancer* 2013; 21(1):35-42  
8  
9 18. Park ER, Japuntich SJ, Rigotti NA et al. A snapshot of smokers after lung and colorectal cancer  
10 diagnosis. *Cancer* 2012; 118(12): 3153-64  
11  
12 19. Hawkes AL, Lynch BM, Youlden DR et al. Health behaviors of Australian colorectal cancer survivors,  
13 compared with noncancer population controls. *Sup Care Can* 2008; 16 (10):1097-104.  
14  
15 20. Anderson AS, Caswell S, Wells M et al. Obesity and lifestyle advice in colorectal cancer survivors - How  
16 well are clinicians prepared? *Colorectal Dis* 2013; 15(8):949-57  
17  
18 21. Demark-Wahnefried W, Aziz NM, Rowland JH et al. Riding the crest of the teachable moment:  
19 promoting long-term health after the diagnosis of cancer. *J Clin Oncol* 2005; 23 (24): 5814-30.  
20  
21 22. Mills ME, Davidson R. Cancer patients' sources of information: use and quality issues. *Psychooncology*  
22 2002; Sep-Oct; 11 (5):371-8  
23  
24 23. Department of Health (2013). National Cancer Survivorship Initiative (NCSI). Living with and beyond  
25 Cancer: Taking Action to Improve Outcomes  
26 [https://www.gov.uk/government/uploads/system/uploads/attachment\\_data/file/181054/9333-TSO-](https://www.gov.uk/government/uploads/system/uploads/attachment_data/file/181054/9333-TSO-2900664-NCSI_Report_FINAL.pdf)  
27 [2900664-NCSI\\_Report\\_FINAL.pdf](https://www.gov.uk/government/uploads/system/uploads/attachment_data/file/181054/9333-TSO-2900664-NCSI_Report_FINAL.pdf). Accessed October 2017  
28  
29 24. World Cancer Research Fund International (WCRF), Cancer Prevention Recommendations.  
30 <http://www.wcrf.org/int/research-we-fund/cancer-prevention-recommendations/cancer-survivors>  
31 Accessed October 2017  
32  
33 25. Rock CL, Doyle C, Demark-Wahnefried W, et al. Nutrition and physical activity guidelines for cancer  
34 survivors. *CA Cancer J Clin* 2012;62(4):243-274.  
35  
36 26. Leventhal H, Leventhal EA, Breland JY. Cognitive science speaks to the "common-sense" of chronic  
37 illness management. *Ann Behav Med* 2011; 41: 152-63 doi: 10.1007/s12160-010-9246-9.  
38  
39 27. Schwarzer R. Modeling health behaviour change: how to predict and modify the adoption and  
40 maintenance of health behaviors. *Appl Psychol* 2008; 57:1–29.  
41  
42 28. Public Health England, The Eatwell Guide. [https://www.gov.uk/government/publications/the-eatwell-](https://www.gov.uk/government/publications/the-eatwell-guide)  
43 [guide](https://www.gov.uk/government/publications/the-eatwell-guide). Accessed October 2017  
44  
45 29. Michie, S., Richardson, M., Johnston, M., Abraham, C., Francis, J., Hardeman, W., et al. (2013). The  
46 Behavior Change Technique Taxonomy (v1) of 93 Hierarchically Clustered Techniques: Building an  
47 International Consensus for the Reporting of Behavior Change Interventions. *Annals of Behavioral*  
48 *Medicine*, 46(1), 81–95.  
49  
50 30. Michie S, van Stralen MM, West R. The behaviour change wheel: a new method for characterising and  
51 designing behaviour change interventions. *Implement Sci* 2011; 6(1): 42. doi:10.1186/1748-5908-6-42  
52  
53  
54  
55  
56  
57  
58  
59  
60

- 1  
2  
3 31. Emslie C, Lewars H, Batty GD et al. Are there gender differences in levels of heavy, binge and problem  
4 drinking? Evidence from three generations in the west of Scotland. *Public Health* 2009;123(1): 12-4.  
5  
6 32. Roe L, Strong C, Whiteside C et al. Dietary Intervention in Primary-Care: Validity of the Dine Method  
7 for Diet Assessment. *Fam Pract* 1994; 11(4):375-81.  
8  
9 33. Craig CL, Marshall AL, Sjöström M et al. International physical activity questionnaire: 12-country  
10 reliability and validity. *Med Sci Sports Exerc* 2003; 35(8): 1381-95.or SPAQ [www.dapa-](http://www.dapa-toolkit.mrc.ac.uk/documents/en/SPA/SPAQ.pdf)  
11 [toolkit.mrc.ac.uk/documents/en/SPA/SPAQ.pdf](http://www.dapa-toolkit.mrc.ac.uk/documents/en/SPA/SPAQ.pdf)  
12  
13 34 Butland RJ, Pang J, Gross ER et al. Two-, six-, and 12-minute walking tests in respiratory disease. *BMJ*  
14 *Med J (Clin Res Ed)* 1982; 284(6329):1607–1608.  
15  
16 35 EORTC Quality of Life Department, QLQ-C30 questionnaire <http://groups.eortc.be/qol/eortc-qlq-c30>  
17 Accessed October 2017  
18  
19 36 Smets EM, Garssen B, Bonke B et al. The Multidimensional Fatigue Inventory (MFI) psychometric  
20 qualities of an instrument to assess fatigue. *J Psychosom Res* 1995; 39 (3), 315–325  
21  
22 37 Emmertsen KJ, Laurberg S. Low anterior resection syndrome score: development and validation of a  
23 symptom-based scoring system for bowel dysfunction after low anterior resection for rectal cancer. *Ann*  
24 *Surg* 2012; 255 (5): 922- 928  
25  
26 38 Gale NK, Heath G, Cameron E, Rashid S, Redwood S. Using the framework method for the analysis of  
27 qualitative data in multi-disciplinary health research. *BMC Med Res Methodol.* 2013;13:117.  
28  
29  
30 39 Scottish Government Cancer Statistics [http://www.isdscotland.org/Health-Topics/Cancer/Cancer-](http://www.isdscotland.org/Health-Topics/Cancer/Cancer-Statistics/Colorectal/#colorectal)  
31 [Statistics/Colorectal/#colorectal](http://www.isdscotland.org/Health-Topics/Cancer/Cancer-Statistics/Colorectal/#colorectal) accessed 7/2/18  
32  
33  
34 40 Moug SJ, Bryce A, Mutrie N et al. Lifestyle interventions are feasible in patients with colorectal cancer  
35 with potential short-term health benefits: a systematic review. *Int J Colorectal Dis* 2017; 32(6):765-775.  
36 doi: 10.1007/s00384-017-2797-5.  
37  
38  
39 41 Campbell MK, Carr C, Devellis B et al. A randomized trial of tailoring and motivational interviewing to  
40 promote fruit and vegetable consumption for cancer prevention and control. *Ann Behav Med* 2009;  
41 38(2):71–85  
42  
43 42 Morey MC, Snyder DC, Sloane R et al. Effects of home-based diet and exercise on functional outcomes  
44 among older,overweight long-term cancer survivors: RENEW: a randomized controlled trial. *JAMA* 2009;  
45 301(18):1883–1891  
46  
47  
48 43 T Hubbard G, O'carroll R, Munro J, Mutrie N, Haw S, Mason H, Treweek S The feasibility and  
49 acceptability of trial procedures for a pragmatic randomised controlled trial of a structured physical  
50 activity intervention for people diagnosed with colorectal cancer: findings from a pilot trial of cardiac  
51 rehabilitation versus usual care (no rehabilitation) with an embedded qualitative study. *Pilot and*  
52 *Feasibility Studies* 2016 2:51  
53  
54  
55  
56  
57  
58  
59

1  
2  
3 44 Practical clinical interventions for diet, physical activity, and weight control in cancer survivors.  
4 Demark-Wahnefried W, Rogers LQ, Alfano CM et al. *CA Cancer J Clin* 2015; ;65(3):167-89. doi:  
5 10.3322/caac.21265.  
6

7  
8 45 World Cancer Research Fund (WCRF), Cancer Prevention recommendations-People living with and  
9 beyond cancer. [https://www.wcrf-uk.org/uk/preventing-cancer/cancer-prevention-](https://www.wcrf-uk.org/uk/preventing-cancer/cancer-prevention-recommendations/people-living-and-beyond-cancer)  
10 [recommendations/people-living-and-beyond-cancer](https://www.wcrf-uk.org/uk/preventing-cancer/cancer-prevention-recommendations/people-living-and-beyond-cancer) Accessed October 2017  
11

12 46 American Cancer Society. [https://www.cancer.org/treatment/survivorship-during-and-after-](https://www.cancer.org/treatment/survivorship-during-and-after-treatment/staying-active/nutrition/nutrition-and-physical-activity-during-and-after-cancer-treatment.html)  
13 [treatment/staying-active/nutrition/nutrition-and-physical-activity-during-and-after-cancer-](https://www.cancer.org/treatment/survivorship-during-and-after-treatment/staying-active/nutrition/nutrition-and-physical-activity-during-and-after-cancer-treatment.html)  
14 [treatment.html](https://www.cancer.org/treatment/survivorship-during-and-after-treatment/staying-active/nutrition/nutrition-and-physical-activity-during-and-after-cancer-treatment.html) Accessed October 2017  
15

16  
17  
18  
19  
20  
21  
22  
23  
24  
25  
26  
27  
28  
29  
30  
31  
32  
33  
34  
35  
36  
37  
38  
39  
40  
41  
42  
43  
44  
45  
46  
47  
48  
49  
50  
51  
52  
53  
54  
55  
56  
57  
58  
59  
60

For peer review only

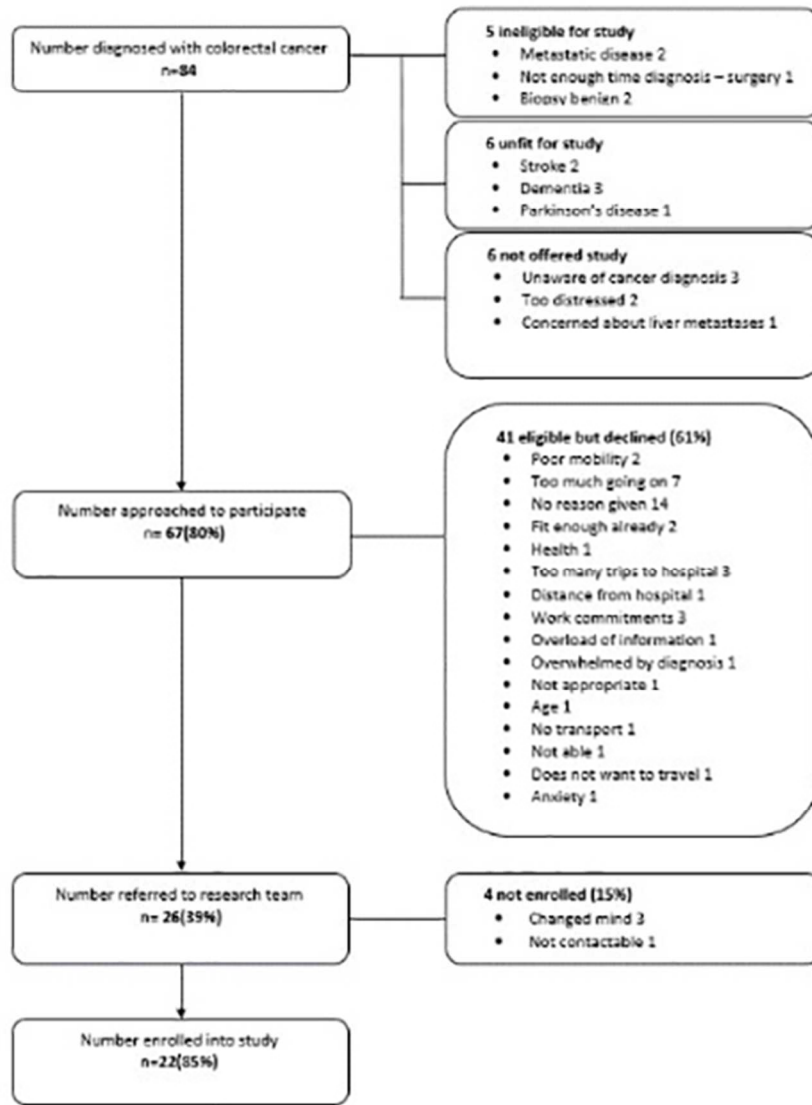

Figure 1 TreatWELL recruitment CONSORT flowchart

46x64mm (300 x 300 DPI)



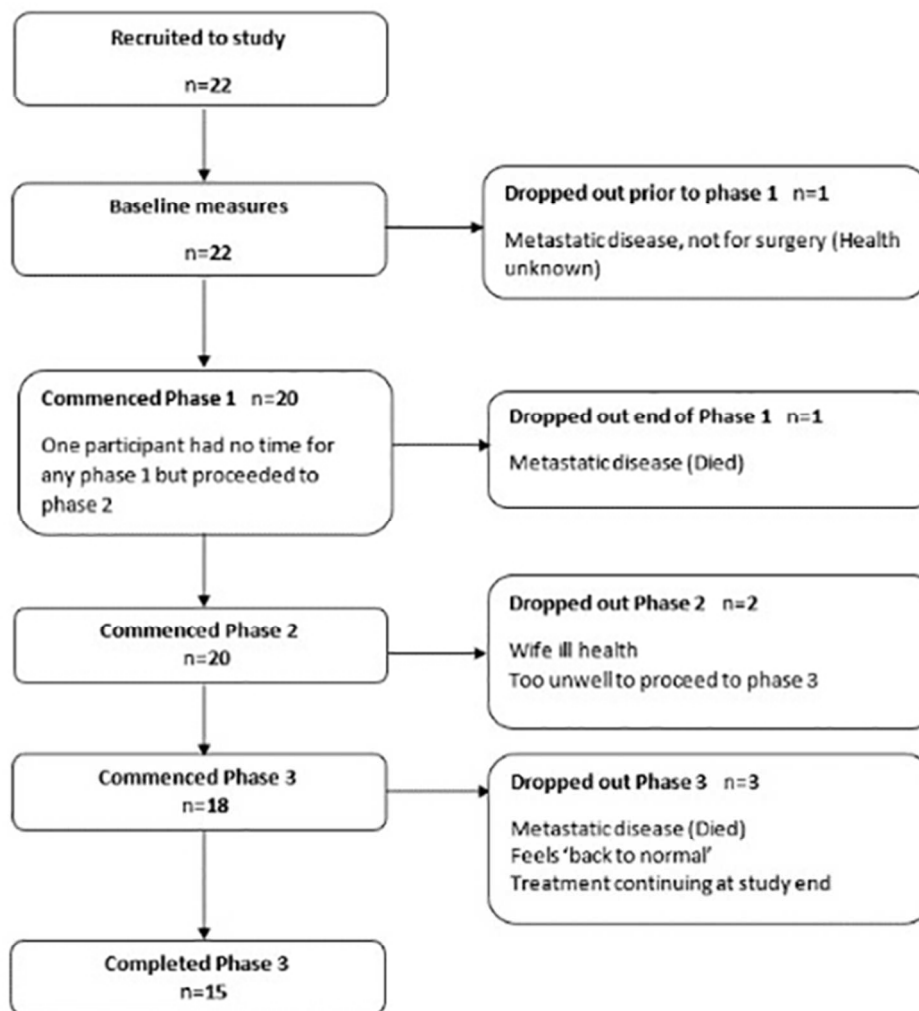

Figure 2 TreatWELL study progression CONSORT flowchart

55x59mm (300 x 300 DPI)

## Appendix 1 TreatWELL intervention delivery plan and resources

### Phase 1 Prehabilitation

#### **a) Delivery mode:**

Face to face study consultation visit 1 (1 hour) (hospital/research centre). All participants were encouraged to bring a support friend/family member

#### **Consultation Focus:**

Getting fit for surgery

- Education and endorsement on smoking, alcohol, physical activity, fruit and vegetables (FAV))

#### **Resources:**

- Fast track smoking cessation card
- Leaflet *How to stop smoking and stay stopped* booklet
- AUDIT alcohol assessment
- NHS Scotland alcohol booklet: *Making a Change*
- Macmillan DVD and booklet on physical activity
- DoH physical activity guidelines
- Pedometer

#### **Behaviour change techniques**

- Motivational Interviewing questions
- Goal setting for 2 health behaviours (smoking, alcohol, physical activity, diet, FAV)
- Implementation Intentions (smoking, alcohol, physical activity, FAV)
- Self-monitoring (activity diary)

AND Telephone home calls (1 to 2) 10-15 minutes (home)

### Phase 2 Surgical Recovery

#### **a) Delivery mode:**

Brief face to face support meeting (10- 15 min; in hospital ward)

#### **Consultation Focus:**

Recovery and continuing support

- Consistent with Enhanced Recovery After Surgery protocol (ERAS)
- Support about relevant post-operative physical activity
- Education and endorsement about diet (regular meals, sugary drinks, FAV)
- Advice offered on smoking and alcohol as appropriate

#### **Resources:**

- Bowel Cancer UK booklets: *Eating and Drinking During Treatment, Fibre after Bowel Cancer* (as appropriate),
- Phase 2 activity diary

#### **Behaviour change techniques**

### Phase 2 (early phase 3)

#### **b) Delivery mode:**

Brief telephone/ward contacts 10-15 minutes

#### **Consultation Focus:**

Recovery and continuing support

- 1<sup>st</sup> visit/call Supportive for managing goals
- 2<sup>nd</sup> visit/call Responding to queries about diet, physical activity, alcohol, smoking

Phase-3 Post surgical/adjuvant therapy/ recovery**a) Delivery mode:**

Face to face consultation study visit 2 (1 hour; hospital/ research centre)

| <b>Participants not on chemotherapy</b>                                                                                                                                                                                                                                                                                                                                                                                                                                                                                                                                                                                                                                                                                                                                                                                                                                                                                  | <b>Participants on Chemotherapy</b>                                                                                                                                                                                                                                                                                                                                                                                                                                                                                                                                                                                                                                                               |
|--------------------------------------------------------------------------------------------------------------------------------------------------------------------------------------------------------------------------------------------------------------------------------------------------------------------------------------------------------------------------------------------------------------------------------------------------------------------------------------------------------------------------------------------------------------------------------------------------------------------------------------------------------------------------------------------------------------------------------------------------------------------------------------------------------------------------------------------------------------------------------------------------------------------------|---------------------------------------------------------------------------------------------------------------------------------------------------------------------------------------------------------------------------------------------------------------------------------------------------------------------------------------------------------------------------------------------------------------------------------------------------------------------------------------------------------------------------------------------------------------------------------------------------------------------------------------------------------------------------------------------------|
| Visit takes place start of phase 3                                                                                                                                                                                                                                                                                                                                                                                                                                                                                                                                                                                                                                                                                                                                                                                                                                                                                       | Visit takes place half way through chemotherapy                                                                                                                                                                                                                                                                                                                                                                                                                                                                                                                                                                                                                                                   |
| <b>Consultation Focus:</b><br>A new start <ul style="list-style-type: none"> <li>• Diet, Keep active (walk and talk),</li> <li>• Management of weight</li> </ul> <b>Resources:</b> <ul style="list-style-type: none"> <li>• Eatwell plate</li> <li>• 7 day food and drink diary</li> <li>• Booklet: <i>Thinking about becoming more active?</i></li> <li>• 12 week activity diary</li> <li>• Resistance bands</li> <li>• NHS Tayside information <i>Helping you manage your weight</i></li> <li>• Information about personalised weight management</li> <li>• Bowel Cancer UK booklet: <i>Losing Weight Safely</i></li> <li>• Weight awareness plan</li> </ul> <b>Behaviour Change techniques</b> <ul style="list-style-type: none"> <li>• Goal setting for two health behaviours physical activity, smoking, alcohol, diet</li> <li>• Implementation intentions</li> <li>• Self-monitoring (body weight log)</li> </ul> | <b>Consultation Focus</b><br>A new start <ul style="list-style-type: none"> <li>• Diet, Keep active (walk and talk),</li> <li>• Introduce weight management concepts</li> </ul> <b>Resources:</b> <ul style="list-style-type: none"> <li>• Eatwell plate</li> <li>• 7 day food and drink diary</li> <li>• Booklet: <i>Thinking about becoming more active?</i></li> <li>• 12 week activity diary</li> <li>• Resistance bands</li> </ul> <b>Behaviour Change techniques</b> <ul style="list-style-type: none"> <li>• Goal setting for two health behaviours physical activity, smoking, alcohol, diet</li> <li>• Implementation intentions</li> <li>• Self-monitoring (body weight log)</li> </ul> |

Face to face consultation study visit 3 (1 hour; hospital/research centre)

| <b>Participants with no chemotherapy</b>                                                                                                                                                                                                                                                                                                                                                                                                 | <b>Chemotherapy</b>                                                                                                                                                                                                                                                                                                                                                                                                                                                                                                                                                                                                                                                                                           |
|------------------------------------------------------------------------------------------------------------------------------------------------------------------------------------------------------------------------------------------------------------------------------------------------------------------------------------------------------------------------------------------------------------------------------------------|---------------------------------------------------------------------------------------------------------------------------------------------------------------------------------------------------------------------------------------------------------------------------------------------------------------------------------------------------------------------------------------------------------------------------------------------------------------------------------------------------------------------------------------------------------------------------------------------------------------------------------------------------------------------------------------------------------------|
| Scheduled 4 weeks post consultation study visit 2                                                                                                                                                                                                                                                                                                                                                                                        | Visit takes place at end of chemotherapy                                                                                                                                                                                                                                                                                                                                                                                                                                                                                                                                                                                                                                                                      |
| <b>Consultation Focus:</b> <ul style="list-style-type: none"> <li>• "Future planning"</li> <li>• Education and endorsement on healthy eating,</li> <li>• Reinforce physical activity advice</li> </ul> <b>Resources:</b> <ul style="list-style-type: none"> <li>• <i>TREATWELL Getting active and eating well after Bowel Cancer treatment</i></li> <li>• Calories and alcohol information</li> </ul> <b>Behaviour Change techniques</b> | <b>Consultation Focus:</b> <ul style="list-style-type: none"> <li>• "Future planning"</li> <li>• Management of weight</li> <li>• Education and endorsement on healthy eating</li> <li>• Reinforce physical activity advice</li> </ul> <b>Resources:</b> <ul style="list-style-type: none"> <li>• NHS Tayside information <i>Helping you manage your weight</i></li> <li>• Information about personalised weight management</li> <li>• Bowel Cancer UK booklet: <i>Losing Weight Safely</i></li> <li>• Weight awareness plan</li> <li>• <i>TREATWELL Getting active and eating well after Bowel Cancer treatment</i></li> <li>• Calories and alcohol information</li> </ul> <b>Behaviour Change techniques</b> |

And up to 8 Brief telephone calls 10-15 minutes at home

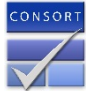

## CONSORT 2010 checklist of information to include when reporting a pilot or feasibility trial\*

| Section/Topic                    | Item No | Checklist item                                                                                                                                                                              | Reported on page No |
|----------------------------------|---------|---------------------------------------------------------------------------------------------------------------------------------------------------------------------------------------------|---------------------|
| <b>Title and abstract</b>        |         |                                                                                                                                                                                             |                     |
|                                  | 1a      | Identification as a pilot or feasibility randomised trial in the title                                                                                                                      | 1                   |
|                                  | 1b      | Structured summary of pilot trial design, methods, results, and conclusions (for specific guidance see CONSORT abstract extension for pilot trials)                                         | 2                   |
| <b>Introduction</b>              |         |                                                                                                                                                                                             |                     |
| Background and objectives        | 2a      | Scientific background and explanation of rationale for future definitive trial, and reasons for randomised pilot trial                                                                      | 5, 6                |
|                                  | 2b      | Specific objectives or research questions for pilot trial                                                                                                                                   | 6                   |
| <b>Methods</b>                   |         |                                                                                                                                                                                             |                     |
| Trial design                     | 3a      | Description of pilot trial design (such as parallel, factorial) including allocation ratio                                                                                                  | 6-9                 |
|                                  | 3b      | Important changes to methods after pilot trial commencement (such as eligibility criteria), with reasons                                                                                    | N/A                 |
| Participants                     | 4a      | Eligibility criteria for participants                                                                                                                                                       | 6                   |
|                                  | 4b      | Settings and locations where the data were collected                                                                                                                                        | 6                   |
|                                  | 4c      | How participants were identified and consented                                                                                                                                              | 6                   |
| Interventions                    | 5       | The interventions for each group with sufficient details to allow replication, including how and when they were actually administered                                                       | 7                   |
| Outcomes                         | 6a      | Completely defined prespecified assessments or measurements to address each pilot trial objective specified in 2b, including how and when they were assessed                                | 8, 9                |
|                                  | 6b      | Any changes to pilot trial assessments or measurements after the pilot trial commenced, with reasons                                                                                        | N/A                 |
|                                  | 6c      | If applicable, prespecified criteria used to judge whether, or how, to proceed with future definitive trial                                                                                 | N/A                 |
| Sample size                      | 7a      | Rationale for numbers in the pilot trial                                                                                                                                                    | 6                   |
|                                  | 7b      | When applicable, explanation of any interim analyses and stopping guidelines                                                                                                                | N/A                 |
| Randomisation:                   |         |                                                                                                                                                                                             |                     |
| Sequence generation              | 8a      | Method used to generate the random allocation sequence                                                                                                                                      | N/A                 |
|                                  | 8b      | Type of randomisation(s); details of any restriction (such as blocking and block size)                                                                                                      | N/A                 |
| Allocation concealment mechanism | 9       | Mechanism used to implement the random allocation sequence (such as sequentially numbered containers), describing any steps taken to conceal the sequence until interventions were assigned | N/A                 |

|    |                                                      |     |                                                                                                                                                                                       |                    |
|----|------------------------------------------------------|-----|---------------------------------------------------------------------------------------------------------------------------------------------------------------------------------------|--------------------|
| 1  | Implementation                                       | 10  | Who generated the random allocation sequence, who enrolled participants, and who assigned participants to interventions                                                               | N/A                |
| 2  | Blinding                                             | 11a | If done, who was blinded after assignment to interventions (for example, participants, care providers, those assessing outcomes) and how                                              | N/A                |
| 3  |                                                      | 11b | If relevant, description of the similarity of interventions                                                                                                                           | N/A                |
| 4  | Statistical methods                                  | 12  | Methods used to address each pilot trial objective whether qualitative or quantitative                                                                                                | 8, 9               |
| 5  | <b>Results</b>                                       |     |                                                                                                                                                                                       |                    |
| 6  | Participant flow (a diagram is strongly recommended) | 13a | For each group, the numbers of participants who were approached and/or assessed for eligibility, randomly assigned, received intended treatment, and were assessed for each objective | 10, Figs 1 & 2     |
| 7  |                                                      | 13b | For each group, losses and exclusions after randomisation, together with reasons                                                                                                      | 10, 11, Figs 1 & 2 |
| 8  | Recruitment                                          | 14a | Dates defining the periods of recruitment and follow-up                                                                                                                               | 10                 |
| 9  |                                                      | 14b | Why the pilot trial ended or was stopped                                                                                                                                              | N/A                |
| 10 | Baseline data                                        | 15  | A table showing baseline demographic and clinical characteristics for each group                                                                                                      | 10                 |
| 11 | Numbers analysed                                     | 16  | For each objective, number of participants (denominator) included in each analysis. If relevant, these numbers should be by randomised group                                          | 12                 |
| 12 | Outcomes and estimation                              | 17  | For each objective, results including expressions of uncertainty (such as 95% confidence interval) for any estimates. If relevant, these results should be by randomised group        | 12-14              |
| 13 | Ancillary analyses                                   | 18  | Results of any other analyses performed that could be used to inform the future definitive trial                                                                                      | N/A                |
| 14 | Harms                                                | 19  | All important harms or unintended effects in each group (for specific guidance see CONSORT for harms)                                                                                 | N/A                |
| 15 |                                                      | 19a | If relevant, other important unintended consequences                                                                                                                                  | N/A                |
| 16 | <b>Discussion</b>                                    |     |                                                                                                                                                                                       |                    |
| 17 | Limitations                                          | 20  | Pilot trial limitations, addressing sources of potential bias and remaining uncertainty about feasibility                                                                             | 2,14               |
| 18 | Generalisability                                     | 21  | Generalisability (applicability) of pilot trial methods and findings to future definitive trial and other studies                                                                     | 15                 |
| 19 | Interpretation                                       | 22  | Interpretation consistent with pilot trial objectives and findings, balancing potential benefits and harms, and considering other relevant evidence                                   | 15                 |
| 20 |                                                      | 22a | Implications for progression from pilot to future definitive trial, including any proposed amendments                                                                                 | 15                 |
| 21 | <b>Other information</b>                             |     |                                                                                                                                                                                       |                    |
| 22 | Registration                                         | 23  | Registration number for pilot trial and name of trial registry                                                                                                                        | 2                  |
| 23 | Protocol                                             | 24  | Where the pilot trial protocol can be accessed, if available                                                                                                                          | N/A                |
| 24 | Funding                                              | 25  | Sources of funding and other support (such as supply of drugs), role of funders                                                                                                       | 3                  |
| 25 |                                                      | 26  | Ethical approval or approval by research review committee, confirmed with reference number                                                                                            | 3                  |

1 Citation: Eldridge SM, Chan CL, Campbell MJ, Bond CM, Hopewell S, Thabane L, et al. CONSORT 2010 statement: extension to randomised pilot and feasibility trials. BMJ. 2016;355.

2 \*We strongly recommend reading this statement in conjunction with the CONSORT 2010, extension to randomised pilot and feasibility trials, Explanation and Elaboration for important  
3 clarifications on all the items. If relevant, we also recommend reading CONSORT extensions for cluster randomised trials, non-inferiority and equivalence trials, non-pharmacological  
4 treatments, herbal interventions, and pragmatic trials. Additional extensions are forthcoming: for those and for up to date references relevant to this checklist, see [www.consort-statement.org](http://www.consort-statement.org).  
5  
6  
7  
8  
9  
10  
11  
12  
13  
14  
15  
16  
17  
18  
19  
20  
21  
22  
23  
24  
25  
26  
27  
28  
29  
30  
31  
32  
33  
34  
35  
36  
37  
38  
39  
40  
41  
42

For peer review only

# BMJ Open

## A feasibility study to assess the delivery of a lifestyle intervention (TreatWELL) for colorectal cancer patients undergoing potentially curative treatment.

|                                 |                                                                                                                                                                                                                                                                                                                                                                                                                                                                                                                                                                                                                                                                                                                                                                                                                                                                                                                                                                                                                                                                                                                                  |
|---------------------------------|----------------------------------------------------------------------------------------------------------------------------------------------------------------------------------------------------------------------------------------------------------------------------------------------------------------------------------------------------------------------------------------------------------------------------------------------------------------------------------------------------------------------------------------------------------------------------------------------------------------------------------------------------------------------------------------------------------------------------------------------------------------------------------------------------------------------------------------------------------------------------------------------------------------------------------------------------------------------------------------------------------------------------------------------------------------------------------------------------------------------------------|
| Journal:                        | <i>BMJ Open</i>                                                                                                                                                                                                                                                                                                                                                                                                                                                                                                                                                                                                                                                                                                                                                                                                                                                                                                                                                                                                                                                                                                                  |
| Manuscript ID                   | bmjopen-2017-021117.R2                                                                                                                                                                                                                                                                                                                                                                                                                                                                                                                                                                                                                                                                                                                                                                                                                                                                                                                                                                                                                                                                                                           |
| Article Type:                   | Research                                                                                                                                                                                                                                                                                                                                                                                                                                                                                                                                                                                                                                                                                                                                                                                                                                                                                                                                                                                                                                                                                                                         |
| Date Submitted by the Author:   | 27-Mar-2018                                                                                                                                                                                                                                                                                                                                                                                                                                                                                                                                                                                                                                                                                                                                                                                                                                                                                                                                                                                                                                                                                                                      |
| Complete List of Authors:       | <p>Macleod, Maureen; University of Dundee, Centre for Research into Cancer Prevention and Screening, Division of Cancer Research<br/> Steele, Robert; University of Dundee, Centre for Research into Cancer Prevention and Screening, Division of Cancer Research<br/> O'carroll, Ronan; University of Stirling, Division of Psychology. School of Natural Sciences<br/> Wells, Mary; University of Stirling, NMAHP Research Unit<br/> campbell, anna; EDinburgh Napier UNiversity, School of life sciences, sport and social sciences<br/> Sugden, Jacqui; University of Dundee, Centre for Research into Cancer Prevention and Screening, Division of Cancer Research<br/> Rodger, Jackie; University of Dundee, Centre for Research into Cancer Prevention and Screening, Division of Cancer Research<br/> Stead, Martine; University of Stirling and the Open University, Institute for Social Marketing<br/> McKell, Jennifer; University of Stirling, Institute for Social Marketing<br/> Anderson, Annie; University of Dundee, Centre for Research into Cancer Prevention and Screening, Division of Cancer Research</p> |
| <b>Primary Subject Heading</b>: | Oncology                                                                                                                                                                                                                                                                                                                                                                                                                                                                                                                                                                                                                                                                                                                                                                                                                                                                                                                                                                                                                                                                                                                         |
| Secondary Subject Heading:      | Patient-centred medicine                                                                                                                                                                                                                                                                                                                                                                                                                                                                                                                                                                                                                                                                                                                                                                                                                                                                                                                                                                                                                                                                                                         |
| Keywords:                       | Prehabilitation, Lifestyle intervention, Colorectal cancer                                                                                                                                                                                                                                                                                                                                                                                                                                                                                                                                                                                                                                                                                                                                                                                                                                                                                                                                                                                                                                                                       |
|                                 |                                                                                                                                                                                                                                                                                                                                                                                                                                                                                                                                                                                                                                                                                                                                                                                                                                                                                                                                                                                                                                                                                                                                  |

SCHOLARONE™  
Manuscripts

**A FEASIBILITY STUDY TO ASSESS THE DELIVERY OF A LIFESTYLE INTERVENTION (TREATWELL) FOR COLORECTAL CANCER PATIENTS UNDERGOING POTENTIALLY CURATIVE TREATMENT.**

**Authors**

Maureen Macleod<sup>1</sup>, Robert JC Steele<sup>1</sup>, Ronan E O'Carroll<sup>2</sup>, Mary Wells<sup>3</sup>, Anna Campbell<sup>4</sup>, Jacqui Sugden<sup>1</sup>, Jackie Rodger<sup>1</sup>, Martine Stead<sup>5</sup>, Jennifer McKell<sup>5</sup> Annie S Anderson<sup>1</sup>

**Addresses**

1. Centre for Research into Cancer Prevention and Screening, Division of Cancer Research, University of Dundee, Level 7, Ninewells Hospital & Medical School, Dundee DD1 9SY, UK  
[m.macleod@dundee.ac.uk](mailto:m.macleod@dundee.ac.uk); [r.j.c.steele@dundee.ac.uk](mailto:r.j.c.steele@dundee.ac.uk); [J.A.Sugden@dundee.ac.uk](mailto:J.A.Sugden@dundee.ac.uk) ;  
[jackierodger@nhs.net](mailto:jackierodger@nhs.net); [a.s.anderson@dundee.ac.uk](mailto:a.s.anderson@dundee.ac.uk)
2. Division of Psychology, School of Natural Sciences, University of Stirling, Stirling, FK9 4LA, UK  
[ronan.ocarroll@stir.ac.uk](mailto:ronan.ocarroll@stir.ac.uk)
3. Nursing, Midwifery and Allied Health Professions Research Unit, University of Stirling, Stirling FK9 4LA  
[mary.wells@stir.ac.uk](mailto:mary.wells@stir.ac.uk)
4. Department Sport Exercise and Health Science, School of Applied Science, Edinburgh Napier University, Edinburgh EH11 4BN  
[anna.campbell@napier.ac.uk](mailto:anna.campbell@napier.ac.uk)
5. Institute for Social Marketing, University of Stirling, Stirling FK9 4LA, Scotland, UK  
[martine.stead@stir.ac.uk](mailto:martine.stead@stir.ac.uk) [j.e.mckell@stir.ac.uk](mailto:j.e.mckell@stir.ac.uk)

Correspondence to:

Professor Annie S. Anderson  
Centre for Research into Cancer Prevention and Screening  
Level 7, Mailbox 7,  
Ninewells Medical School  
University of Dundee  
Dundee DD1 9SY

Tel: 0044 (0)1382 383299 Fax: 0044 (0)1382 632333 E mail: [a.s.anderson@dundee.ac.uk](mailto:a.s.anderson@dundee.ac.uk)

Word count: Abstract 299 Paper 5373



**ABSTRACT**

**Objectives** To assess the feasibility of delivering and evaluating a lifestyle programme for colorectal cancer patients undergoing potentially curative treatments.

**Study design** Non-randomised feasibility trial

**Setting** NHS Tayside

**Participants** Adults with stage I - III colorectal cancer

**Intervention** The programme targeted smoking, alcohol, physical activity, diet and weight management. It was delivered in 3 face-to-face counselling sessions (plus 9 phone calls) by lifestyle coaches over three phases (1 - pre-surgery, 2 - surgical recovery and 3 - post treatment recovery).

**Primary outcome** Feasibility measures (recruitment, retention, programme implementation, achieved measures, fidelity, factors affecting protocol adherence and acceptability).

**Secondary outcomes** Measured changes in body weight, waist circumference, walking and self – reported physical activity, diet, smoking and alcohol intake, fatigue, bowel function and Quality of Life (QoL).

**Results** Of 84 patients diagnosed, 22 (26%) were recruited and 15 (18%) completed the study. Median time for intervention delivery was 5.5 hours. Coaches reported covering most (>70%) of the intervention components but had difficulties during phase 2. Evaluation measures (except walk test) were achieved by all participants at baseline, and most (<90%) at end of phase 2 and phase 3, but <20% at end of phase 1. Protocol challenges included limited time between diagnosis and surgery and the presence of co-morbidities. The intervention was rated highly by participants but limited support from NHS staff was noted. The majority of participants (77%) had a BMI >25kg/m<sup>2</sup> and none were underweight. Physical activity data showed a positive trend towards increased activity overall but no other changes in secondary outcomes were detected.

**Conclusions** To make this intervention feasible for testing as a full trial, further research is required on a) recruitment optimisation b) appropriate assessment tools c) protocols for phase 2 and 3 which can build in flexibility and d) ways for NHS staff to facilitate the program.

**Trial registration number** ISRCTN 52345929

### STRENGTHS AND LIMITATIONS

- This feasibility study is the first to have offered a comprehensive lifestyle intervention programme at diagnosis with support before, during and after treatment in patients with colorectal cancer.
- The study highlights the wide range of variables that need to be considered in designing a future randomised controlled trial (including recruitment and support from NHS staff, complexities of patient health status and time required for permissions, assessment and interventions).
- The lack of randomisation means it is not possible to estimate uptake to a randomised controlled trial.
- The work was undertaken in a single NHS health board and may not be representative of other treatment centres.

### COMPETING INTEREST STATEMENT

All authors have completed the ICMJE uniform disclosure form at [www.icmje.org/coi\\_disclosure.pdf](http://www.icmje.org/coi_disclosure.pdf) and declare: no support from any organisation for the submitted work other than the Chief Scientist Office who funded the award, no financial relationships with any organisations that might have an interest in the submitted work in the previous three years, no other relationships or activities that could appear to have influenced the submitted work.

### ETHICS, CONSENTS AND PERMISSIONS

Ethical approval was provided by the East of Scotland Research Ethics Service, REC reference no. 13/ES/0153. All participants provided written, informed consent.

### FUNDING

Funding for this study was provided by the Chief Scientist Office (CZH/4/939). The funders played no part in the design, execution or decision to publish this research.

### AUTHORS' CONTRIBUTION

All authors have made substantial contributions to the study conception and design, and the development and editing of the manuscript. MM led initial study design and development, assisted with data collection, carried out the analyses and drafted the initial draft manuscript; RJCS had the initial concept and led initial study design and development; RO'C led the fidelity assessments (development and analyses) and provided guidance on project progression; MW had the initial concept and led initial study design and development; AC contributed to study design; JS carried out the day to day management of the study and led the data collection; JR contributed to study design; MS and JMCK led on qualitative assessments (development and analyses); ASA had the initial concept and led initial study design and development, contributed to data analyses and had oversight of the study.

All authors have read, edited and approved the manuscript for publication.

### ACKNOWLEDGEMENTS

We would like to thank the participants of this study, lifestyle coaches Catherine Savage and Carol Baird and the study administrator Jill Hampton who arranged the interviews and FGDs.

We would also like to thank patient adviser Ms Glynnis Marra and Dr Alison Harrow, Tayside Cancer Patient and Public Involvement Group, for their expert guidance.

**DATA SHARING**

Technical appendix, statistical code, and dataset available from the authors on request.

For peer review only

## INTRODUCTION

Colorectal cancer (CRC) survival has improved in the last decade due to earlier diagnosis and new treatments but, in Scotland, survivors still have notable excess mortality within the **first year post diagnosis** compared to other European countries [1]. Survivors also have a high rate of pre-existing co-morbidities and treatment related symptoms. The latter are experienced by 15% undergoing colonic surgery, 33% with rectal surgery, 50% of those with chemo-radiation therapy and 66% of patients undergoing short course radiotherapy. These symptoms include fatigue, physical discomfort and bowel function problems [2].

In people diagnosed with cancer it is recognised that smoking cessation, improved physical activity and diet have the potential to impact on treatment outcomes and cancer recurrence. A number of studies have reported that higher levels of physical activity are associated with better physical functioning [3] and reduced fatigue [4] although further work is needed in this area [5]. Follow up studies report better disease free, recurrence free and overall survival in people who are more physically active [6, 7]. Intervention trials have shown that higher levels of physical activity initiated at pre-habilitation (pre surgery), post-surgery, during and after adjuvant therapies (rehabilitation) [8-10] are associated with improved cardiorespiratory fitness, muscular strength, physical functioning, quality of life, and reduced psychosocial distress.

There is growing evidence for the impact of diet on CRC cancer outcomes [11]. A large observational study has reported that a higher level of a Western dietary intake (compared to a lower level of Westernisation) resulted in lower disease-free and overall survival rates [12]. At intervention level, a trial of dietary counselling delivered during treatment [13] showed that nutrition improvements were associated with reduced treatment related co-morbidity (radiotherapy toxicity) at **3 months** and after a mean follow up of 6 years. Three post-treatment exploratory trials [14-16] of combined lifestyle interventions have reported improved dietary behaviour, reduced fatigue, improved exercise tolerance, functional capacity and quality of life.

There is some evidence to support lifestyle interventions in the pre-surgical and post-treatment periods, but no trial has yet evaluated an intervention covering the full patient journey. Patients report confusion about appropriate lifestyle behaviours because they have received conflicting advice at different treatment stages and rarely receive personalised support in the period after treatments end and during return to normal health [17]. It has been noted that relatively few CRC patients stop smoking after diagnosis (13.7% pre-diagnosis to 9% 5 months later) [18]. Current data suggest that, in CRC patients, physical activity levels drop significantly by 6 months post-diagnosis [19]. This may reflect lack of consistent guidance from clinicians, and patient confusion over the merits of rest versus activity [20]. Similarly, for diet, misconceptions exist over body weight gain (or loss) and understanding of appropriate food selection.

There are a number of behavioural frameworks that could support lifestyle change from the start of care such as the concept of the “teachable moment” [21]. Cancer care clinicians, starting at diagnosis and throughout the cancer pathway, can be powerful advocates to help patients understand the importance of a healthy lifestyle and they have expressed interest in providing guidance [22]. Patients consider information obtained from cancer specialists to be of the best quality [20]. Despite major concerns over their diagnosis many patients request advice on what might be done to prepare for surgery and there is a need for clinicians to identify an effective programme with the potential to improve health in the first year after diagnosis. Increasingly, asymptomatic patients are diagnosed via the national bowel screening programme which means that this patient group is less frail than those

1  
2  
3 diagnosed late and have considerable potential to initiate lifestyle change. Opportunities in the “pre-  
4 rehabilitation” period have been highlighted in cancer strategy documents [23] but little is known about  
5 likely uptake of interventions.  
6

7 This study aimed to assess the practical aspects of delivering and evaluating a lifestyle intervention  
8 programme (TreatWELL) for CRC patients undergoing potentially curative treatments in order to  
9 inform the feasibility of undertaking a randomised controlled trial (RCT) to assess the clinical and cost-  
10 effectiveness of this intervention at one year after diagnosis.  
11

12 Specific objectives were to assess recruitment and retention to assist in the design of a future RCT,  
13 assess the feasibility of data collection procedures, ease of programme implementation, patient  
14 acceptability, fidelity and factors influencing adherence to the intervention.  
15

## 16 17 **METHODS**

### 18 **Study design and setting**

19 This study was a single arm, two-centre feasibility study of the TreatWELL intervention programme  
20 carried out in tertiary level teaching hospitals in Tayside, UK.  
21  
22

### 23 **Sample size**

24 We aimed to recruit 34 participants in order to be able to assess feasibility objectives and to provide  
25 data to inform the sample size required to show significant differences in health outcome variables in  
26 a fully powered RCT. These numbers were based on a pragmatic assessment of patient numbers,  
27 eligibility and participation based on a previous study undertaken with the same patient group (at  
28 post-treatment stage) in the same geographic area [15].  
29  
30

### 31 **Eligibility**

32 Eligible patients were adults aged >18 years, capable of giving informed consent, considered to have  
33 stage I to III colorectal cancer, eligible for potentially curative treatment (had to be fit for major  
34 surgery). It should be noted that participants were recruited before CT Scans and eligibility was based  
35 on clinical examination. Patients who had severe cognitive impairment, emergency surgery or pre-  
36 operative neo-adjuvant therapy were excluded from the study.  
37  
38

### 39 **Recruitment**

40 Eligible patients were introduced to the study by a clinical nurse specialist (CNS) after discussing  
41 treatment and care plans following a cancer diagnosis. At this meeting the CNS introduced the study  
42 and endorsed its importance for helping to achieve lifestyle change in the pre-surgical period.  
43 Interested patients were provided with a participant information sheet, an invitation and  
44 endorsement letter from the lead CRC clinician for Tayside and a pre-paid opt-in reply slip which they  
45 could return to the research team. A research nurse (RN) then contacted patients, who had either  
46 provided their contact details to the CNS or returned the pre-paid reply slip, to discuss the study in  
47 detail and (if appropriate) make an appointment to obtain written informed consent and take baseline  
48 measurements. This appointment was held at the referring hospital or the participant's home if a  
49 hospital location was reported as a barrier to participation.  
50  
51

### 52 **Intervention**

53 The TreatWELL intervention programme aimed to facilitate collaboratively agreed behaviour changes  
54 towards achieving and maintaining smoking cessation, increased physical activity (to at least 150  
55 minutes moderate intensity activity per week), caloric intake appropriate to weight status and a  
56 nutrient dense diet. All goals were consistent with the American Cancer Society and World Cancer  
57  
58  
59

1  
2  
3 Research Fund guidance for cancer survivors [24, 25]. The behavioural approaches were informed by  
4 two main theoretical frameworks: self-regulatory theory [26] and the health action process approach  
5 [27].  
6

7 Following baseline measures consented patients' contact details were passed to a Lifestyle Coach (LC)  
8 who then commenced the TreatWELL personalised intervention. The LCs had a nursing background,  
9 experience with cancer patient management and underwent a 3 day bespoke training programme  
10 covering smoking cessation, increasing moderate physical activity, brief interventions on alcohol and  
11 weight management (post-surgical and post treatment). The intervention was delivered via three face-  
12 to-face contacts (one per intervention phase and a minimum of 9 phone calls) supported by written  
13 literature and a range of behavioural techniques.  
14

- 15 • Phase 1 Pre-habitation to start within 3-10 days of diagnosis to surgery
  - 16 • Phase 2 Surgical recovery to start 1 day post-op and aim to complete within 21 days
  - 17 • Phase 3 Post-surgical / adjuvant therapy recovery to start 21 days post-op for 25 weeks
- 18  
19

20 The total intervention period comprised 31 weeks although duration was flexible as it was based on  
21 the individual's treatment regimen. The delivery mode, consultation focus, resources and behaviour  
22 change techniques used in each phase are presented in Appendix 1. Decisions about phase completion  
23 (e.g. defining the end of post-surgical recovery) and progression was agreed in conjunction with the  
24 CNS. In summary, each phase of the programme comprised verbal educational approaches with  
25 written resources (e.g. booklets, resistance bands) and the use of behavioural techniques. Importantly,  
26 personalised, specific action goals were identified with a focus on two health behaviours that were  
27 selected as a priority for that individual (e.g. smoking, physical activity). All participants were invited to  
28 engage a support person (e.g. spouse) to assist in their adherence with the programme. It should be  
29 noted that the protocol for phase 3 varied according to whether chemo therapy use. For patients with  
30 no adjuvant therapy, the progression to addressing body weight issues (over, under weight and weight  
31 loss) was addressed at the start of this phase. For participants undergoing chemotherapy the focus on  
32 diet and weight management was delayed to avoid any confusion which might arise with dietary  
33 issues related to treatment side effects (e.g. nausea).  
34  
35  
36

37 Participants were encouraged to develop personalised action and coping plans. Activities (e.g. brisk  
38 walking) were demonstrated and tried by participants. Access to an equipment tool kit (pedometers,  
39 resistance bands and DVDs) was also offered. Emphasis was placed on self-monitoring and goal  
40 setting, e.g. physical activity through pedometers, with weekly feedback in the first week of each  
41 phase. In phase 2, participants were encouraged to commence activity in accordance with ability, their  
42 post-op condition and guidance from their health care team. In Phase 3, the participant's Phase 1 plan  
43 was repeated and expanded to include an emphasis on core strength, mobility and functional ability,  
44 with a strict protocol for referral to a physiotherapist if there were any safety concerns.  
45

46 In phase 1, advice for participants not at risk of malnutrition ( $BMI > 20 \text{ kg/m}^2$ ) focused on avoiding  
47 weight gain and increasing nutrient quality of their diet in line with the Department of Health Eatwell  
48 guide [28]. Participants were also advised about decreasing alcohol intake, as appropriate. No energy  
49 prescription was set in phase 1. In phase 2 and initially in phase 3, nutrition advice focused on  
50 symptom management (e.g. anorexia, vomiting and bowel problems) and worked towards achieving a  
51 nutrient dense diet. In the later stage of phase 3, all participants ( $BMI > 20 \text{ kg/m}^2$ ) were given  
52 personalised guidance on a nutrient dense diet and avoidance of excess weight gain. Participants with  
53 a  $BMI > 25 \text{ kg/m}^2$  were advised on avoidance of weight gain and modest weight reduction ( $> 5\%$  weight  
54 loss) using a personalised energy prescription goal. Communications emphasised the concept of  
55 building resilience through the combined approach of increasing muscle mass (through physical  
56  
57  
58  
59  
60

activity) and decreasing excess body fat (through caloric reduction). The importance of regular self-weighting was stressed and feedback provided at each telephone consultation.

Informed by behaviour change techniques used in previous interventions [29] and the behaviour change wheel [30], a range of evidence-based behavioural techniques were employed to motivate and support lifestyle change. These included motivational interviewing, formation of specific implementation intentions, self-monitoring, personalised action and coping plans, feedback and reinforcement.

### Measurements

The research nurses prospectively collected details on socio-demographic background, clinical information (including tumour stage and site), type of surgery, stoma status, medications and details of adjuvant treatments.

### Primary Outcome Measures

Recruitment and retention were assessed from research nurse records. Information on reasons why patients were ineligible or choose not to participate were recorded with patient consent.

Programme implementation (by LCs) was estimated from a structured pro-forma completed after every patient contact which recorded actual values or scaled ratings on:

- Intervention start time (days after diagnosis)
- Total contact time
- Ease or difficulty of implementing the session
- Perceived fidelity to the intervention content
- Extent of patient engagement, receptivity and motivation

Achieved measurements (by RNs) were recorded at baseline and the end of each phase of the study.

Participants' views on acceptability of the intervention and factors influencing adherence were explored in in-depth qualitative interviews conducted by MS and JMCK. Interviews were scheduled for around 45-60 minutes and were conducted either face to face or by telephone. Interviews were digitally recorded with participants' consent, and transcribed verbatim for analysis. The original intention was to interview a random sample of one in three participants at the end of phase 2 and another at the end of phase 3. However, because of the low number of participants everyone was invited to take part in an interview towards the end of their journey through the intervention programme.

### Secondary outcome measures

Anthropometric measures were taken as follows:

- Body weight measured with the participant wearing indoor clothing and no shoes, using a calibrated Seca 877 digital scale.
- Height measured with a Seca Leicester portable stadiometer.
- Body mass index (BMI) was calculated – weight (kg)/height (m)<sup>2</sup>.
- Waist circumference measured with a Seca 201 measuring tape, with the participant in the standing position and the tape positioned midway between the lateral lower rib margin and the iliac crest. If these landmarks could not be identified, the measurement was taken at the level of the umbilicus. Two measurements were taken post-exhalation and the mean recorded.

Smoking status was self-reported and alcohol intake was measured using 7 day alcohol recall [31] – units of alcohol consumed per week and number of alcohol free days per week were noted.

1  
2  
3 Dietary intake was measured using the dietary instrument for nutrition education (DINE)  
4 questionnaire [32].

5  
6 Physical activity was assessed using the International Physical Activity Questionnaire [IPAQ] short form  
7 [33] and the 6 minute walk test [34].

8  
9 Health outcomes of interest were explored - fatigue was measured using the multidimensional fatigue  
10 inventory (MFI-20) [35] and physical function and quality of life by the EORTC GLQ C30 Quality of Life  
11 questionnaire for bowel cancer patients and the EORTC GLQ C29 Quality of Life questionnaire for  
12 colorectal cancer patients [36]. Bowel function was assessed by the Low Anterior Resection Syndrome  
13 Score (LARS) [37].

### 14 15 **Data analysis**

16 Descriptive statistics allowed characterisation of the cohort. Outcome measures were assessed for  
17 completeness but no statistical analysis was undertaken given the small sample which was not  
18 powered to show definitive results.

19  
20 Data from proformas completed by the LC were analysed by descriptive statistics (mean  $\pm$  SD) to  
21 estimate completeness of delivery and areas for improvement, and to provide contextual information  
22 (including NHS service issues) on patient engagement.

23  
24 Data from the transcripts were coded by MS and JMck using a framework approach [38], with an  
25 initial framework developed around different aspects of engagement in the study and intervention:  
26 recruitment and delivery acceptability, engagement with lifestyle change, facilitators and barriers to  
27 lifestyle change, and any issues which would need to be considered if conducting a full RCT. The  
28 framework was revised to incorporate additional themes which emerged from the transcripts (for  
29 example, concerning PA goals and conflicting advice given by other health professionals).

### 30 31 32 **Patient and Public Involvement**

33 The Chair of Tayside Cancer Patient and Public Involvement Group provided guidance on project  
34 development and progression. The group also identified a potential patient rep who subsequently  
35 assisted in reading and commenting on study design, communication materials and specific questions.  
36 Guidance was requested from the patient rep on sensitive communications regarding body weight and  
37 introducing the topic. Patients were not involved in study recruitment.

38  
39 We have no plans to disseminate the results of this feasibility work to participants.

## 40 41 **RESULTS**

### 42 43 **Recruitment and retention**

44 Over the 7 month recruitment period (01.04.14 to 31.10.14) the number of patients diagnosed and  
45 recorded with colorectal cancer was 84 and 22 (26%) were recruited to the study (Figure 1). Of the  
46 remainder, 17 were ineligible, unfit or not approached to participate and 45 declined to take part, the  
47 most common reason was the extra burden of the study. It should be noted that because of the short  
48 window for intervention, some participants were recruited before CT Scans were complete. In one  
49 case, lung metastases were diagnosed after CT staging. Surgery was still undertaken for this patient  
50 on the clinical basis that it had the potential to improve survivorship.

51  
52 The median age of non-participants was 74 (range 44 to 90 years) and 49% were male (Table 1). Of the  
53 22 who were recruited, the mean age was 67 years and 77% were male. Baseline data on Body Mass  
54 Index (BMI) and key health behaviours (smoking, physical activity, alcohol and diet score) indicate  
55 significant potential for health gain.  
56  
57  
58  
59



1  
2  
3 In total 15 (68%) completed the study (Figure 2). The main reason for drop out at all stages was major  
4 ill health.  
5  
6  
7  
8  
9  
10  
11  
12  
13  
14  
15  
16  
17  
18  
19  
20  
21  
22  
23  
24  
25  
26  
27  
28  
29  
30  
31  
32  
33  
34  
35  
36  
37  
38  
39  
40  
41  
42  
43  
44  
45  
46  
47  
48  
49  
50  
51  
52  
53  
54  
55  
56  
57  
58  
59  
60

For peer review only

**Table 1 Baseline demographic and clinical characteristics by completion<sup>#</sup>**

|                                                                   | Recruited<br>n=22             | Completed<br>n=15           | Dropped out/lost<br>to follow up<br>n=7 |
|-------------------------------------------------------------------|-------------------------------|-----------------------------|-----------------------------------------|
| Male Gender                                                       | 17 (77%)                      | 11 (73%)                    | 6 (86%)                                 |
| Age: Median (LQ, UQ)                                              | 67.0 (60.0, 74.3)             | 66.0 (60.0, 72.0)           | 75.0 (64.0, 80.0)                       |
| Baseline BMI (kg/m <sup>2</sup> ): Median (LQ, UQ)                | 28.3 (25.5, 33.5)             | 28.6 (26.1, 33.6)           | 25.8 (24.1, 32.6)                       |
| SIMD Category <sup>#</sup>                                        |                               |                             |                                         |
| 1-3 (most affluent?)                                              | 5 (23%)                       | 4 (27%)                     | 1 (14%)                                 |
| 4-7                                                               | 10 (45%)                      | 7 (46%)                     | 3 (43%)                                 |
| 8-10 (most deprived?)                                             | 7 (32%)                       | 4 (27%)                     | 3 (43%)                                 |
| Smoking Status                                                    |                               |                             |                                         |
| current                                                           | 2 (9%)                        | 1 (7%)                      | 1 (14%)                                 |
| ex-smoker                                                         | 14 (64%)                      | 10 (67%)                    | 4 (57%)                                 |
| never smoked                                                      | 6 (27%)                       | 4 (26%)                     | 2 (28%)                                 |
| Treatments                                                        |                               |                             |                                         |
| Chemotherapy & radiotherapy                                       | 3 (14%)                       | 2 (13%)                     | 1 (14%)                                 |
| Chemotherapy only                                                 | 6 (27%)                       | 5 (33%)                     | 1 (14%)                                 |
| No oncology                                                       | 10 (45%)                      | 8 (53%)                     | 2 (29%)                                 |
| Palliative care                                                   | 3 (14%)                       | 0 (0%)                      | 3 (43%)                                 |
| Cancer staging                                                    |                               |                             |                                         |
| Duke A                                                            | 3 (14%)                       | 3 (20%)                     | 0 (0%)                                  |
| Duke B                                                            | 6 (27%)                       | 3 (20%)                     | 3 (42%)                                 |
| Duke C                                                            | 8 (36%)                       | 6 (40%)                     | 2 (29%)                                 |
| Squamous cell carcinoma                                           | 2 (9%)                        | 2 (13%)                     | 0 (0%)                                  |
| Well differentiated neuroendocrine                                | 1 (5%)                        | 1 (7%)                      | 0 (0%)                                  |
| Metastases                                                        | 2 (9%)                        | 0 (0%)                      | 2 (29%)                                 |
| Behaviours impacting on cancer risk                               |                               |                             |                                         |
| Smoker: n (%)                                                     | 2(9%)                         | 1(7%)                       | 1(14%)                                  |
| Alcohol consumers: n (%)                                          | 15(68%)                       | 10(67%)                     | 5(71%)                                  |
| Alcohol consumption (units per week):<br>Median (LQ, UQ)<br>Range | 10(4, 22)<br>1 - 70           | 12.5(3.75, 53.25)<br>3 - 70 | 11.0(~)**<br>~                          |
| Alcohol free days: Median (LQ, UQ)<br>Range                       | 4(1, 5)<br>0 - 6              | 3.5(1.0, 5.0)<br>0 - 6      | 0(~)**<br>~                             |
| Leisure PA (mins): Median (LQ, UQ)<br>Range                       | 480(227, 709)<br>40 - 2070    | 480(240, 705)<br>40 - 2070  | 480(190, 735)<br>150 - 1030             |
| Work PA (mins): Median (LQ, UQ)<br>Range                          | 1800(163, 4200)<br>125 - 4800 | 200(~)*<br>125 - 4800       | 2700(~)*<br>1800 - 3600                 |
| Total PA (work + leisure): Median (LQ, UQ)<br>Range               | 532(228, 886)<br>40 - 5250    | 480(240, 720)<br>40 - 5250  | 649(190, 2830)<br>150 - 4080            |
| Fat rating score <sup>#</sup> : Median (LQ, UQ)<br>Range          | 32.0(26.75, 41.25)<br>16 - 64 | 32.0(27.0, 42.0)<br>17 - 64 | 29.0(26.0, 37.0)<br>16 - 44             |
| Fibre rating score <sup>#</sup> : Median (LQ, UQ)<br>Range        | 30.5(25.5, 40.0)<br>10 - 50   | 31.0(28.0, 40.0)<br>10 - 50 | 27.0(24.0, 40.0)<br>15 - 40             |

All results are n (%) unless stated otherwise

<sup>#</sup>SIMD Scottish Index of Multiple Deprivation

\* &lt;4 participants in work

\*\*n=1

### Programme Implementation

1 The median time in phase 1 (pre-habilitation) was 15 days. The median time in phase 2 was 36.5 days and  
2 phase 3 was 102 days but was frequently extended by clinical problems due to health status post-surgery,  
3 treatment responses and pre-existing co-morbidities. Table 2 illustrates the significant and varied  
4 challenges experienced by individual participants during the recovery phase. Many patients did not have  
5 sufficient time in phase 3 (prior to project end) to enable secondary outcomes to be reliably assessed.  
6  
7  
8  
9  
10  
11  
12  
13  
14  
15  
16  
17  
18  
19  
20  
21  
22  
23  
24  
25  
26  
27  
28  
29  
30  
31  
32  
33  
34  
35  
36  
37  
38  
39  
40  
41  
42  
43  
44  
45  
46  
47  
48  
49  
50  
51  
52  
53  
54  
55  
56  
57  
58  
59  
60

For peer review only

**Table 2 Summary of participants' clinical progress during the TreatWELL study**

Participant completed study n= 15      Dropped out n=7

|    |                                                                                                                                                                                                                                                                                       |
|----|---------------------------------------------------------------------------------------------------------------------------------------------------------------------------------------------------------------------------------------------------------------------------------------|
| 1  | Biopsy showed advanced disease after patient had undergone baseline measures and the phase 1 LC intervention visit. Patient excluded from further study measures.                                                                                                                     |
| 2  | Surgery as planned but poor postoperative recovery and discharged to a continuing care unit. Intravenous (IV) chemotherapy started after discharge home followed by oral chemotherapy and radiotherapy. Waiting for stoma reversal. All phases of study completed.                    |
| 3  | Surgery as planned. Slow recovery post-surgery and on parenteral nutrition. No adjuvant therapies required. Discharged home with carers twice a day, walking with a Zimmer frame. May have further surgery and did not progress beyond phase 2 in study. Seen at peripheral hospital. |
| 4  | Surgery as planned. No adjuvant therapies required. Became worried about recurrence after discharge and had to have psychological support. Hip pain re-started in phase 3. Lung metastases and heart failure diagnosed. Dropped out during phase 3. Patient died.                     |
| 5  | Surgery as planned. No adjuvant therapies required. All study phases completed.                                                                                                                                                                                                       |
| 6  | Short phase 1. Emergency surgery to de-function bowel (stoma formation). Successful chemotherapy and radiotherapy before main surgery. Phases 2 and 3 switched round for this participant. All study phases completed.                                                                |
| 7  | Surgery as planned then admission to high dependency unit post-operatively. Discharged but re-admitted for further surgery and stoma formation. Chemotherapy given. All study phases completed.                                                                                       |
| 8  | Surgery performed. Further surgery performed for removal of residual tumour. Stoma reversed. No adjuvant therapies required. All study phases completed.                                                                                                                              |
| 9  | Biopsy showed advanced disease after patient had undergone baseline measures. Patient not going ahead for surgery and excluded from further study measures.                                                                                                                           |
| 10 | Surgery as planned and chemotherapy. Admitted with diabetic ketoacidosis but diabetes since resolved. Slow recovery. Phase 1 delivered day before surgery Phase 2 and 3 of study completed.                                                                                           |
| 11 | Short phase 1. Surgery performed. No adjuvant therapies required. Completed phase 2 and 3 of the study.                                                                                                                                                                               |
| 12 | Phase 1 delivered day before surgery. Surgery performed. Chemotherapy commenced early due to cancellation in clinic and completed. Phase 2 completed. Wife has health issues which prevented him completing phase 3.                                                                  |
| 13 | Surgery as planned, No adjuvant therapies required. All phases of study completed. Home visits.                                                                                                                                                                                       |
| 14 | Surgery as planned and chemotherapy started after surgery. All study phases completed. Seen at peripheral hospital.                                                                                                                                                                   |
| 15 | Surgery as planned and no chemotherapy required. All phases of study completed (short phase 1).Home visits.                                                                                                                                                                           |
| 16 | Surgery as planned, No adjuvant therapies required. All phases of study completed. Home visits.                                                                                                                                                                                       |
| 17 | Surgery as planned. Oral chemotherapy after surgery. All phases of study completed.                                                                                                                                                                                                   |
| 18 | For de-functioning stoma and pre-surgery radiotherapy and chemotherapy. Surgery performed. Lost to follow up as still requiring intensive treatment at study end (phase 1 and 2 only).                                                                                                |
| 19 | Surgery as planned but re-admitted. Slow recovery from surgery with significant complications. Phase1, 2 and 3. Dropped out of study during phase 3 as felt back to normal and did not require further support.                                                                       |
| 20 | No phase 1 undertaken. Surgery as planned, long post-operative recovery. No adjuvant therapies required. Phase 2 and 3 of study completed.                                                                                                                                            |
| 21 | Surgery performed. No adjuvant therapies required. All phases of study completed. Home visits.                                                                                                                                                                                        |
| 22 | Phase 1 delivered day before surgery. Surgery performed. Chemotherapy required. Phases 2 and 3 of study completed.                                                                                                                                                                    |

1  
2 Total median intervention delivery by lifestyle counsellors was 5 hrs 29 mins. LCs reported that patient  
3 engagement was high, with 93-100% being at least “fairly engaged” at all stages. Similarly the LCs  
4 reported that participants were receptive and interested in the information being delivered.  
5

6  
7 LCs rated participants as at least “fairly motivated” to improve diet and physical activity levels. During the  
8 immediate recovery stage (phase 2) LCs were most likely to report goal setting for diet and PA as “neither  
9 easy nor difficult” (73% and 64% for diet and PA respectively). At the phase 3a time point, LCs rated the  
10 ease of goal setting more favourably, with 46% of consultations described as “easy” to set dietary goals  
11 and 82% for PA.  
12

### 13 14 15 **Achieved Measurements**

16 Baseline measures were completed on all participants, except in four cases, where the 6 minute walk test  
17 had to be excluded due to lack of space in the participant’s home. Only 6 out of 33 participants were seen  
18 at the end of phase 1 due to the difficulty in fitting in visits prior to surgery. All participants remaining in  
19 the study were seen at the end of phase 2, but it was not possible to carry out all anthropometric  
20 measurements and walking tests at this point. Walking tests were not possible at the end of phase 3.  
21 Questionnaire data were generally well completed however some participants were reluctant to answer  
22 sexual function questions (LARS questionnaire) in all phases.  
23  
24  
25

### 26 **Factors affecting protocol adherence**

27 The LCs reported that they were able to cover most of the intervention components during phase 1 (78%  
28 delivery), 3a (73% delivery) and 3b (90% delivery). However, during the post-surgical phase (phase 2), LCs  
29 reported difficulties with access to patients. Lifestyle counselling was reported as most challenging during  
30 visits 1 (first contact) and 2 (immediately post-surgery). Delivery became more comfortable towards the  
31 end, with LCs reporting 70% of the final sessions as “fairly easy” (compared with 39% in Phase 1 and 46%  
32 in Phase 2).  
33  
34

35  
36 The major challenges of intervention delivery reported by the LCs were:

- 37 • The short time between diagnosis and surgery
- 38 • Participants identifying time to fit in the baseline and intervention visits in addition to diagnostic  
39 and treatment preparation schedules
- 40 • Seeing patients in phase 2 (short period)
- 41 • Difficulties identifying the transition from end of phase 2 and start of phase 3
- 42 • Poor clinical progress (some patients were readmitted)
- 43 • Due to complications a longer treatment period was required which extended phase 3 beyond  
44 the project life
- 45 • Mixed messages from NHS staff and TreatWELL LCs
- 46  
47  
48  
49

### 50 **Participants views on acceptability**

51 Of 20 participants who completed phase 2, 14 were invited for interview, 3 declined and 11 participated  
52 (7 men and 4 women), with a mean age of 66 ± 6 (range 57 to 75) years. Interviewees were from a range  
53 of areas of deprivation.  
54  
55  
56  
57  
58  
59

1 Most participants recalled that they had been recruited around the time of their diagnosis. For some, this  
2 timing appeared to have facilitated participation, as the study offered a potentially beneficial experience  
3 on which to focus, taking their mind off their diagnosis and concerns for the future. Several were  
4 reassured by the endorsement of colorectal consultants. Generally, the amount of contact, and the  
5 balance between visits and telephone calls, appeared acceptable, and the provision of home visits was  
6 particularly appreciated. Some appeared a little apprehensive about the prospect of 'going it alone' at the  
7 end of the study but they recognised that its end signalled another milestone in their recovery.  
8 Participants spoke positively of LCs and felt that LCs had been able to move them gently into doing things  
9 they might have been reluctant to do. Some hinted that they had relied on the counsellor for wider  
10 emotional support.  
11

12 The PA advice appeared to have been particularly salient, with most participants being able to describe  
13 their PA goals and targets. Pedometers were felt to have been very helpful. Some described having  
14 become so fixed on their PA goals that they "over-did things", but most felt that the advice had  
15 encouraged them to be more active and to "push" themselves more than they might otherwise have  
16 done. Participants generally felt that they had managed to take on board the diet advice, although some  
17 had struggled with cutting out 'treats'.  
18

19 A number of facilitators and barriers to engagement were identified. Prior enjoyment of walking and  
20 previous experience of weight loss programmes were both beneficial, as were supportive family members  
21 who encouraged adherence to healthy eating and sometimes participated in activity along with the  
22 participant. Receiving a diagnosis of cancer was a major motivator for adherence. Participants were  
23 determined to overcome their diagnosis and quickly regain their health, not least for significant others.  
24 Similarly, participants were motivated to make changes in order to put themselves in the best condition  
25 for surgery and to optimise their recovery. One woman was motivated to maintain a healthy weight  
26 during her stay in hospital by witnessing fellow patients who were overweight struggling with their  
27 mobility. Monitoring progress especially with regard to levels of PA also provided motivation and some  
28 enjoyment for participants.  
29

30 A main factor which negatively affected adherence to the intervention was participants' physical health.  
31 Some participants felt too unwell to increase PA, although this was alleviated for some by building  
32 strength gradually, whilst others described comorbidities hampering their attempts to be physically  
33 active.  
34

35 Some clinical staff were reported to have advised participants to gain weight by eating whatever they  
36 liked and by not discouraging unhealthier foods, in direct contrast to TreatWELL. This inconsistency  
37 caused confusion, and participants reported following the advice of clinical staff. Participants also  
38 highlighted that NHS staff had little awareness of TreatWELL and appeared to provide little  
39 encouragement. More generally, it was noted that nursing staff did not encourage patients to get up and  
40 move on the ward.  
41

### 42 **Secondary Outcomes**

43 There was no change in smoking habits – one of the two smokers at baseline was lost to follow-up and  
44 the other smoker continued to smoke. The number of participants who reported consuming alcohol  
45 decreased between baseline and end of phase 3 although in some individuals intake increased. PA data  
46 shows a positive trend towards increased activity overall. For the 15 who completed the study, minutes of  
47 physical activity nearly doubled from a median of 480 (IQ range 240 – 720) per week to 840 (IQ range 330  
48 to 1260). This was largely due to an increase in leisure time activities, but, a decrease in active time at  
49 work (few participants continued to work during the study period). Dietary data indicated no increase in  
50  
51  
52  
53  
54  
55  
56  
57  
58  
59

total fat score but a desirable increase in fibre score. Quality of Life data indicated some increase in global health function but also increases in anxiety.

The majority of participants had excess weight (77%) and 40% were obese at baseline (Table 1). None were underweight. At the end of phase 2, body weight had decreased as expected in the post-surgical period. Despite this weight loss, no underweight individuals were detected at the end of phase 3 and the proportion with excess weight remained. The 6 minute walk test indicated no decrease in functional ability by the end of phase 3.

It should be noted however, that all secondary outcome results were obtained principally to test ability to undertake measures and are not powered to detect differences.

## DISCUSSION

Whilst it is recognised that pre-surgical (prehab) lifestyle intervention may have significant impact on improving health outcomes in the early months following a diagnosis of colorectal cancer there is little evidence of multi-component intervention RCTs to support investment in this area. This study illustrates the complexities of delivering and evaluating such interventions and highlights issues that need to be addressed prior to progressing further work. The main findings show that it is difficult to recruit at diagnosis because of the multitude of investigations taking place, the staff's perceptions of frailty and age (although all participants were deemed fit for surgery) and the relatively short period available for recruitment, baseline data collection and intervention delivery before surgery. It is notable that a high proportion of participants were male (77%) and whilst national data reports [39] that more men are diagnosed with colorectal cancer compared to women (54% versus 46%), the proportion in this study is higher than anticipated. The reason for this is not clear but does indicate the need to explore this in future work. Phase 2 was predictably short for most patients, but longer in those who had previous illness or had developed post-surgical complications. It should be noted that because patients were recruited at diagnosis, the extent of the disease (i.e. stage) was unknown and complications were unpredictable. Many participants spent insufficient time in phase 3 (prior to study end) for the impact of the intervention to be assessed, highlighting the need for a longer study duration for final outcome measurements. The clinical pathways of participants were unpredicted and impacted on study retention. The hardest challenge in delivery was when to introduce the next phase of the intervention (phase 2 to phase 3) because many participants had complex journeys through treatment. These findings highlight that compliance with a strict RCT protocol for this type of intervention is likely to be difficult. Outcome measures were largely acceptable, although consideration should be given to whether the more sensitive questions on quality of life are required. Participant views suggest the intervention was largely acceptable, and that the focus on physical activity was appropriate. The high number of patients with excess body weight at study recruitment (and exit) is of concern and a future trial encompassing weight loss is likely to need long term support and follow up.

Whilst our recent intervention study [40] has tested the feasibility of undertaking lifestyle interventions in people at high risk of colorectal (and breast) cancer, this study (to the best of our knowledge) is the first to have offered a comprehensive lifestyle intervention at diagnosis with support before, during and after treatment in patients with colorectal cancer. Although the study is small and was undertaken in a single NHS health board, the results have highlighted a wide range of issues that would need to be addressed in a full trial of a multi-component intervention. The lack of randomisation means that it is not possible to assess whether uptake to a randomised trial with control condition would be similar.

1 Moug et al [41] have recently reviewed 14 randomised controlled trials in this patient group and  
2 concluded that lifestyle interventions are feasible in patients with CRC. However, it is notable that there  
3 were no RCTs of tobacco and alcohol. In general, they reported variable recruitment rates but good  
4 adherence and retention (as is the case in our own study). Ravasco et al [13] have demonstrated positive  
5 outcomes in CRC patients referred for radiotherapy (irrespective of other therapies provided) after  
6 dietary counselling. However, other trials of diet and lifestyle have been focussed on patients after the  
7 end of treatment [14, 42, 43]. The challenges to conducting a trial in this patient group are similar to  
8 those described by Hubbard et al [44] in feasibility work of a pragmatic RCT for a group based  
9 rehabilitation programme for CRC survivors which reported a high likelihood of recruitment bias,  
10 potential of sub-optimal completion of outcome data, missing data and poor intervention adherence.  
11

12  
13 It is important to note that no specific progression criteria were identified (or agreed) for trial progression  
14 in the current study, but each of the parameters identified are relevant in decisions around future  
15 progression (recruitment, retention, programme implementation, achieved measures, fidelity, factors  
16 affecting protocol adherence and acceptability). The findings show that the recruitment was too low  
17 (both due to eligibility, people approached and willingness to participate), too many participants failed to  
18 complete because of major health problems, the intervention delivery varied widely from the protocol (in  
19 terms of timing and approaches) and the number of achieved measures (notably at end of phase 1) would  
20 be inadequate to provide any indication of impact.  
21

22  
23 In accordance with Thabane et al [45] there are four possible progression outcomes as follows  
24 (i) Stop - *main study not feasible*; (ii) Continue, but modify protocol - *feasible with modifications*;  
25 (iii) Continue without modifications, but monitor closely - *feasible with close monitoring* and (iv) Continue  
26 without modifications - *feasible as is*.

27 Our results suggest that it would be plausible to continue but that the protocol should be modified and  
28 further feasibility testing undertaken prior to a full trial  
29

30  
31 The current intervention approach is ambitious, but could be refined for testing in an RCT if all visits can  
32 be linked more closely with clinical appointments, measurement visits are reduced and if the clinical team  
33 were encouraged to help support lifestyle changes. Fundamentally interventions being tested should be  
34 scalable, durable and cost effective [46]. Whilst there is much practical guidance on diet and lifestyle for  
35 cancer survivors [47, 48] and interventions which have been demonstrated to be safe and feasible there  
36 remains a need for studies that can demonstrate the impact of lifestyle intervention on disease  
37 outcomes. Research in this area requires multilevel approaches with full support from health service staff  
38 (both in recruitment and support for lifestyle action), intervention staff for the delivery of tailored,  
39 personalised approaches and patient interest and advocacy.  
40  
41  
42

## 43 CONCLUSIONS

44  
45 To make this intervention feasible for testing as a full RCT, further research is required on a) recruitment  
46 optimization b) appropriate assessment tools c) protocols for phase 2 and 3 which can build in flexibility  
47 and d) ways for NHS staff to facilitate the programme.  
48  
49  
50  
51  
52  
53  
54  
55  
56  
57  
58  
59



**Figure legend**

1  
2  
3  
4  
5  
6  
7  
8  
9  
10  
11  
12  
13  
14  
15  
16  
17  
18  
19  
20  
21  
22  
23  
24  
25  
26  
27  
28  
29  
30  
31  
32  
33  
34  
35  
36  
37  
38  
39  
40  
41  
42  
43  
44  
45  
46  
47  
48  
49  
50  
51  
52  
53  
54  
55  
56  
57  
58  
59  
60

Figure 1 TreatWELL recruitment CONSORT flowchart

Figure 2 TreatWELL study progression CONSORT flowchart

For peer review only

1  
2  
3  
4  
5  
6  
7  
8  
9  
10  
11  
12  
13  
14  
15  
16  
17  
18  
19  
20  
21  
22  
23  
24  
25  
26  
27  
28  
29  
30  
31  
32  
33  
34  
35  
36  
37  
38  
39  
40  
41  
42  
43  
44  
45  
46  
47  
48  
49  
50  
51  
52  
53  
54  
55  
56  
57  
58  
59  
60  
**REFERENCES**

1. The EUROcare-4 database on cancer survival in Europe. Available from: <http://www.eurocare.it/Results/tabid/79/Default.aspx>. Accessed October 2017
2. Andreyev HJ, Davidson SE, Gillespie C et al. Practice guidance on the management of acute and chronic gastrointestinal problems arising as a result of treatment for cancer; *Gut* 2011 ; 61(2), 179-92.
3. Johnson BL, Trentham-Dietz A, Koltyn KF et al. Physical activity and function in older, long-term colorectal cancer survivors. *Cancer Causes & Control* 2009; 20 (5), 775-84.
4. Peddle CJ, Au HJ, Courneya KS. Associations between exercise, quality of life, and fatigue in colorectal cancer survivors. *Dis Colon Rectum* 2008; 51 (8), 1242-8.
5. Brandenbarg D., Korsten, J. H. W. M., Berger, M. Y., Berendsen, A. J. The effect of physical activity on fatigue among survivors of colorectal cancer: a systematic review and meta-analysis. *Support Care Cancer*. 2017 Doi: 10.1007/s00520-017-3920-4. [Epub ahead of print]
6. Meyerhardt JA, Giovannucci EL, Holmes MD et al. Physical activity and survival after colorectal cancer diagnosis. *J Clin Oncol* 2006; 24 (22), 3527-34
- 7 Haydon AM, Macinnnis RJ, English DR et al. Effect of physical activity and body size on survival after diagnosis with colorectal cancer. *Gut* 2006; 55(1): 62-67
8. Mayo NE, Feldman L, Scott S et al. Impact of preoperative change in physical function on postoperative recovery: argument supporting prehabilitation for colorectal surgery. *Surgery* 2011; 150 (3), 505-14
9. Timmerman H, de Groot JF, Hulzebos HJ et al. Feasibility and preliminary effectiveness of preoperative therapeutic exercise in patients with cancer: a pragmatic study. *Physiother Theory Pract* (2011); 27 (2):117-24
10. Pinto BM, Papandonatos GD, Goldstein MG et al. Home-based physical activity intervention for colorectal cancer survivors; *Psychooncology* 2013;22(1):54-64
11. Van Blarigan EL & Meyerhardt JA (2015) Role of physical activity and diet after colorectal cancer. *J Clin Oncol* 1;33 (16) 1825-34
12. Meyerhardt JA, Niedzwiecki D, Hollis D et al. Association of dietary patterns with cancer recurrence and survival in patients with stage III colon cancer. *JAMA* 2008; 298(7):754-64.
13. Ravasco P, Monteiro-Grillo I, Camilo M. Individualised nutrition intervention is of major benefit to colorectal cancer patients: long term follow up of a randomized controlled trial of nutritional therapy. *Am J Clin Nutr* 2012; 96(6): 1346-53
14. Bourke L, Thompson G, Gibson DJ et al. Pragmatic lifestyle intervention in patients recovering from colon cancer: A randomized controlled pilot study. *Arch Phys Med Rehabil* 2011. 92(5): 749-755
15. Anderson AS, Caswell S, Wells M et al. "It makes you feel so full of life" LiveWell, a feasibility study of a personalised lifestyle programme for colorectal cancer survivors. *Support Care Cancer* 2010; 18(4):409-15
16. Hawkes AL, Gollschewski S, Lynch BM et al. A telephone-delivered lifestyle intervention for colorectal cancer survivors 'CanChange': a pilot study. *Psychooncology* 2009; 18 (4):449-55

17. Anderson AS, Coyle J, Steele RJC. Lifestyle issues for colorectal cancer survivors – perceived needs, beliefs and opportunities. *Support Care Cancer* 2013; 21(1):35-42
18. Park ER, Japuntich SJ, Rigotti NA et al. A snapshot of smokers after lung and colorectal cancer diagnosis. *Cancer* 2012; 118(12): 3153-64
19. Hawkes AL, Lynch BM, Youlden DR et al. Health behaviors of Australian colorectal cancer survivors, compared with noncancer population controls. *Sup Care Can* 2008; 16 (10):1097-104.
20. Anderson AS, Caswell S, Wells M et al. Obesity and lifestyle advice in colorectal cancer survivors - How well are clinicians prepared? *Colorectal Dis* 2013; 15(8):949-57
21. Demark-Wahnefried W, Aziz NM, Rowland JH et al. Riding the crest of the teachable moment: promoting long-term health after the diagnosis of cancer. *J Clin Oncol* 2005; 23 (24): 5814-30.
22. Mills ME, Davidson R. Cancer patients' sources of information: use and quality issues. *Psychooncology* 2002; Sep-Oct; 11 (5):371-8
23. Department of Health (2013). National Cancer Survivorship Initiative (NCSI). Living with and beyond Cancer: Taking Action to Improve Outcomes  
[https://www.gov.uk/government/uploads/system/uploads/attachment\\_data/file/181054/9333-TSO-2900664-NCSI\\_Report\\_FINAL.pdf](https://www.gov.uk/government/uploads/system/uploads/attachment_data/file/181054/9333-TSO-2900664-NCSI_Report_FINAL.pdf). Accessed October 2017
24. World Cancer Research Fund International (WCRF), Cancer Prevention Recommendations.  
<http://www.wcrf.org/int/research-we-fund/cancer-prevention-recommendations/cancer-survivors>  
Accessed October 2017
25. Rock CL, Doyle C, Demark-Wahnefried W, et al. Nutrition and physical activity guidelines for cancer survivors. *CA Cancer J Clin* 2012;62(4):243-274.
26. Leventhal H, Leventhal EA, Breland JY. Cognitive science speaks to the "common-sense" of chronic illness management. *Ann Behav Med* 2011; 41: 152-63 doi: 10.1007/s12160-010-9246-9.
27. Schwarzer R. Modeling health behaviour change: how to predict and modify the adoption and maintenance of health behaviors. *Appl Psychol* 2008; 57:1–29.
28. Public Health England, The Eatwell Guide. <https://www.gov.uk/government/publications/the-eatwell-guide>. Accessed October 2017
29. Michie, S., Richardson, M., Johnston, M., Abraham, C., Francis, J., Hardeman, W., et al. (2013). The Behavior Change Technique Taxonomy (v1) of 93 Hierarchically Clustered Techniques: Building an International Consensus for the Reporting of Behavior Change Interventions. *Annals of Behavioral Medicine*, 46(1), 81–95.
30. Michie S, van Stralen MM, West R. The behaviour change wheel: a new method for characterising and designing behaviour change interventions. *Implement Sci* 2011; 6(1): 42. doi:10.1186/1748-5908-6-42
31. Emslie C, Lewars H, Batty GD et al. Are there gender differences in levels of heavy, binge and problem drinking? Evidence from three generations in the west of Scotland. *Public Health* 2009;123(1): 12-4.
32. Roe L, Strong C, Whiteside C et al. Dietary Intervention in Primary-Care: Validity of the Dine Method for Diet Assessment. *Fam Pract* 1994; 11(4):375-81.

33. Craig CL, Marshall AL, Sjöström M et al. International physical activity questionnaire: 12-country reliability and validity. *Med Sci Sports Exerc* 2003; 35(8): 1381-95. or SPAQ [www.dapa-toolkit.mrc.ac.uk/documents/en/SPA/SPAQ.pdf](http://www.dapa-toolkit.mrc.ac.uk/documents/en/SPA/SPAQ.pdf)
- 34 Butland RJ, Pang J, Gross ER et al. Two-, six-, and 12-minute walking tests in respiratory disease. *BMJ Med J (Clin Res Ed)* 1982; 284(6329):1607–1608.
- 35 EORTC Quality of Life Department, QLQ-C30 questionnaire <http://groups.eortc.be/qol/eortc-qlq-c30> Accessed October 2017
- 36 Smets EM, Garssen B, Bonke B et al. The Multidimensional Fatigue Inventory (MFI) psychometric qualities of an instrument to assess fatigue. *J Psychosom Res* 1995; 39 (3), 315–325
- 37 Emmertsen KJ, Laurberg S. Low anterior resection syndrome score: development and validation of a symptom-based scoring system for bowel dysfunction after low anterior resection for rectal cancer. *Ann Surg* 2012; 255 (5): 922- 928
- 38 Gale NK, Heath G, Cameron E, Rashid S, Redwood S. Using the framework method for the analysis of qualitative data in multi-disciplinary health research. *BMC Med Res Methodol.* 2013;13:117.
- 39 Scottish Government Cancer Statistics <http://www.isdscotland.org/Health-Topics/Cancer/Cancer-Statistics/Colorectal/#colorectal> accessed 7/2/18
- 40 Anderson AS Dunlop J, Gallant S, Macleod M, Miedzybrodzka Z, Mutrie N, O'Carroll RE, Stead M, Steele RJC, Taylor RS, Vinnicombe S, Berg J. Feasibility study to assess the impact of a lifestyle intervention ('LivingWELL') in people having an assessment of their family history of colorectal or breast cancer *BMJ Open.* 2018 8(2):e019410. doi: 10.1136/bmjopen-2017-019410.
- 41 Moug SJ, Bryce A, Mutrie N et al. Lifestyle interventions are feasible in patients with colorectal cancer with potential short-term health benefits: a systematic review. *Int J Colorectal Dis* 2017; 32(6):765-775. doi: 10.1007/s00384-017-2797-5.
- 42 Campbell MK, Carr C, Devellis B et al. A randomized trial of tailoring and motivational interviewing to promote fruit and vegetable consumption for cancer prevention and control. *Ann Behav Med* 2009; 38(2):71–85
- 43 Morey MC, Snyder DC, Sloane R et al. Effects of home-based diet and exercise on functional outcomes among older, overweight long-term cancer survivors: RENEW: a randomized controlled trial. *JAMA* 2009; 301(18):1883–1891
- 44 T Hubbard G, O'carroll R, Munro J, Mutrie N, Haw S, Mason H, Treweek S The feasibility and acceptability of trial procedures for a pragmatic randomised controlled trial of a structured physical activity intervention for people diagnosed with colorectal cancer: findings from a pilot trial of cardiac rehabilitation versus usual care (no rehabilitation) with an embedded qualitative study. *Pilot and Feasibility Studies* 2016 2:51
- 45 Thabane L, Ma J, Chu R, Cheng J, Ismaila A, Rios LP, Robson R, Thabane M, Giangregorio L, Goldsmith CH A Tutorial on pilot Studies; The What, Why and How. *BMC Reseach Methodol.* 20`0 6:10:1 DOI 10.1186/1471-2288-10-1.T

1 46 Practical clinical interventions for diet, physical activity, and weight control in cancer survivors.  
2 Demark-Wahnefried W, Rogers LQ, Alfano CM et al. *CA Cancer J Clin* 2015; ;65(3):167-89. doi:  
3 10.3322/caac.21265.

4 47 World Cancer Research Fund (WCRF), Cancer Prevention recommendations-People living with and  
5 beyond cancer. [https://www.wcrf-uk.org/uk/preventing-cancer/cancer-prevention-](https://www.wcrf-uk.org/uk/preventing-cancer/cancer-prevention-recommendations/people-living-and-beyond-cancer)  
6 [recommendations/people-living-and-beyond-cancer](https://www.wcrf-uk.org/uk/preventing-cancer/cancer-prevention-recommendations/people-living-and-beyond-cancer) Accessed October 2017  
7

8  
9 48 American Cancer Society. [https://www.cancer.org/treatment/survivorship-during-and-after-](https://www.cancer.org/treatment/survivorship-during-and-after-treatment/staying-active/nutrition/nutrition-and-physical-activity-during-and-after-cancer-treatment.html)  
10 [treatment/staying-active/nutrition/nutrition-and-physical-activity-during-and-after-cancer-](https://www.cancer.org/treatment/survivorship-during-and-after-treatment/staying-active/nutrition/nutrition-and-physical-activity-during-and-after-cancer-treatment.html)  
11 [treatment.html](https://www.cancer.org/treatment/survivorship-during-and-after-treatment/staying-active/nutrition/nutrition-and-physical-activity-during-and-after-cancer-treatment.html) Accessed October 2017  
12

13  
14  
15  
16  
17  
18  
19  
20  
21  
22  
23  
24  
25  
26  
27  
28  
29  
30  
31  
32  
33  
34  
35  
36  
37  
38  
39  
40  
41  
42  
43  
44  
45  
46  
47  
48  
49  
50  
51  
52  
53  
54  
55  
56  
57  
58  
59  
60

For peer review only

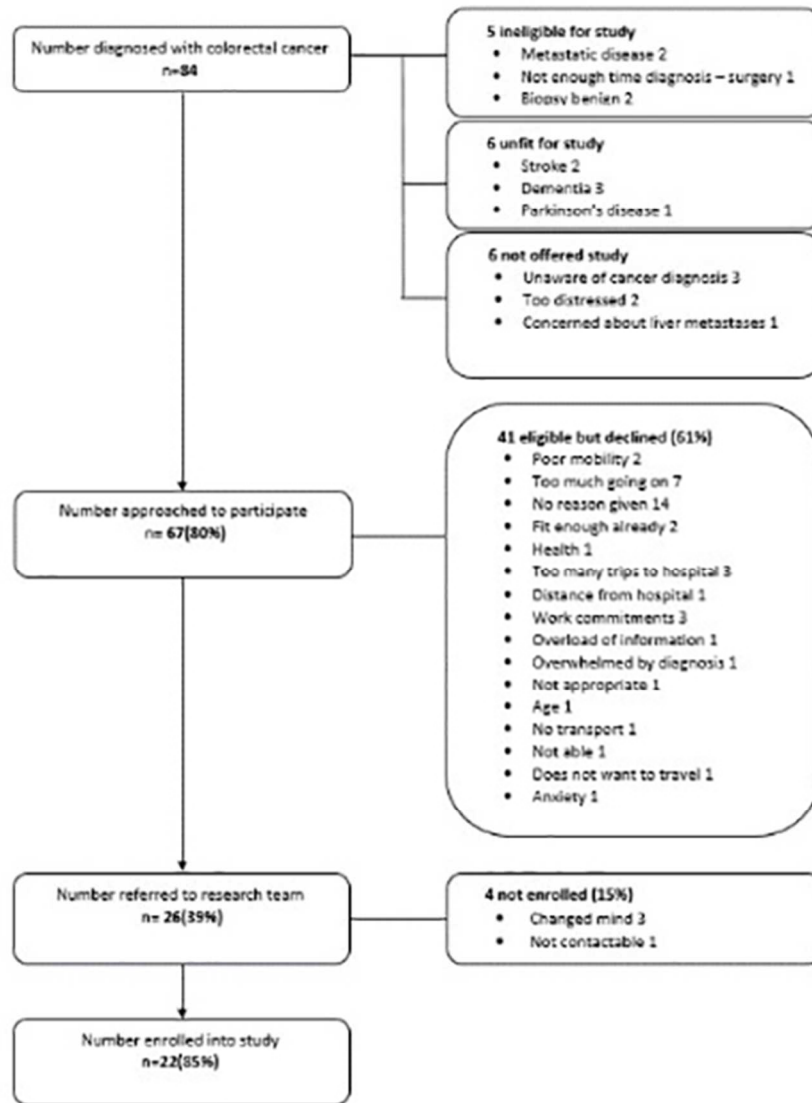

Figure 1 TreatWELL recruitment CONSORT flowchart

46x64mm (300 x 300 DPI)

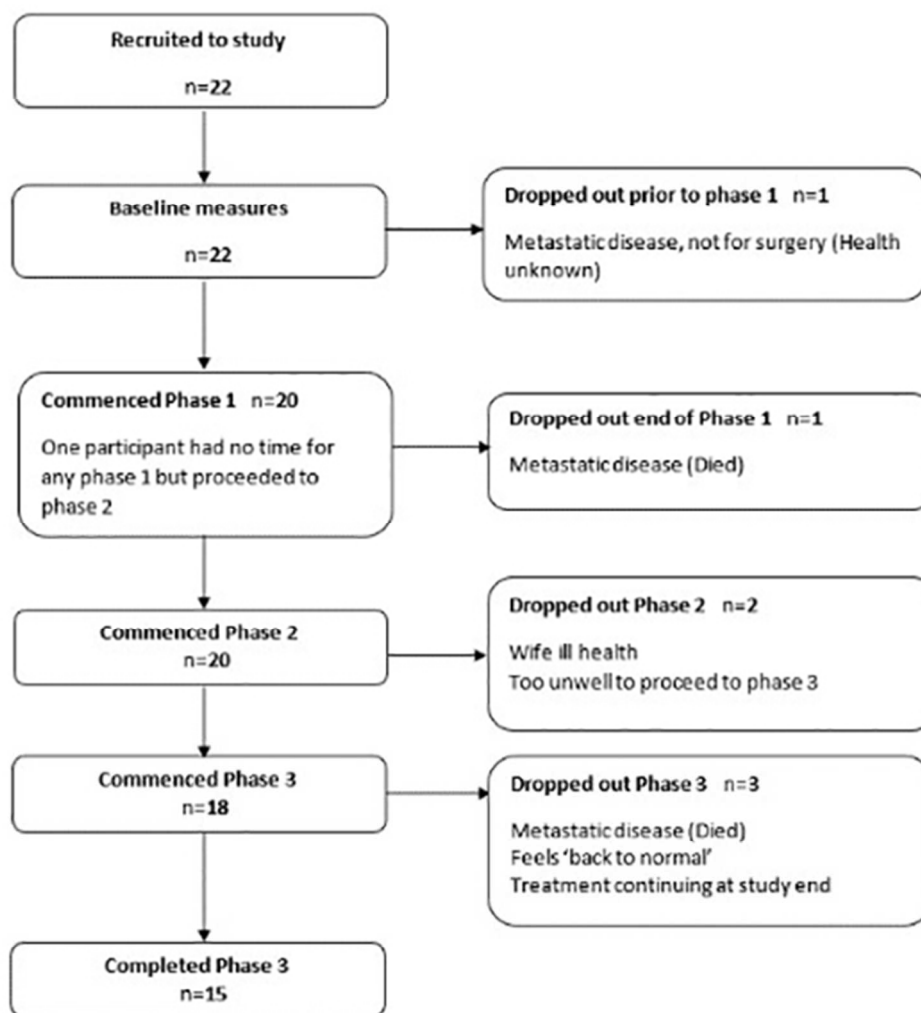

Figure 2 TreatWELL study progression CONSORT flowchart

55x59mm (300 x 300 DPI)

## Appendix 1 TreatWELL intervention delivery plan and resources

### Phase 1 Prehabilitation

#### **a) Delivery mode:**

Face to face study consultation visit 1 (1 hour) (hospital/research centre). All participants were encouraged to bring a support friend/family member

#### **Consultation Focus:**

Getting fit for surgery

- Education and endorsement on smoking, alcohol, physical activity, fruit and vegetables (FAV))

#### **Resources:**

- Fast track smoking cessation card
- Leaflet *How to stop smoking and stay stopped* booklet
- AUDIT alcohol assessment
- NHS Scotland alcohol booklet: *Making a Change*
- Macmillan DVD and booklet on physical activity
- DoH physical activity guidelines
- Pedometer

#### **Behaviour change techniques**

- Motivational Interviewing questions
- Goal setting for 2 health behaviours (smoking, alcohol, physical activity, diet, FAV)
- Implementation Intentions (smoking, alcohol, physical activity, FAV)
- Self-monitoring (activity diary)

AND Telephone home calls (1 to 2) 10-15 minutes (home)

### Phase 2 Surgical Recovery

#### **a) Delivery mode:**

Brief face to face support meeting (10- 15 min; in hospital ward)

#### **Consultation Focus:**

Recovery and continuing support

- Consistent with Enhanced Recovery After Surgery protocol (ERAS)
- Support about relevant post-operative physical activity
- Education and endorsement about diet (regular meals, sugary drinks, FAV)
- Advice offered on smoking and alcohol as appropriate

#### **Resources:**

- Bowel Cancer UK booklets: *Eating and Drinking During Treatment, Fibre after Bowel Cancer* (as appropriate),
- Phase 2 activity diary

#### **Behaviour change techniques**

### Phase 2 (early phase 3)

#### **b) Delivery mode:**

Brief telephone/ward contacts 10-15 minutes

#### **Consultation Focus:**

Recovery and continuing support

- 1<sup>st</sup> visit/call Supportive for managing goals
- 2<sup>nd</sup> visit/call Responding to queries about diet, physical activity, alcohol, smoking



**Phase-3 Post surgical/adjuvant therapy/ recovery****a) Delivery mode:**

Face to face consultation study visit 2 (1 hour; hospital/ research centre)

| <b>Participants not on chemotherapy</b>                                                                                                                                                                                                                                                                                                                                                                                                                                                                                                                                                                                                                                                                                                                                                                                                                                                                                  | <b>Participants on Chemotherapy</b>                                                                                                                                                                                                                                                                                                                                                                                                                                                                                                                                                                                                                                                               |
|--------------------------------------------------------------------------------------------------------------------------------------------------------------------------------------------------------------------------------------------------------------------------------------------------------------------------------------------------------------------------------------------------------------------------------------------------------------------------------------------------------------------------------------------------------------------------------------------------------------------------------------------------------------------------------------------------------------------------------------------------------------------------------------------------------------------------------------------------------------------------------------------------------------------------|---------------------------------------------------------------------------------------------------------------------------------------------------------------------------------------------------------------------------------------------------------------------------------------------------------------------------------------------------------------------------------------------------------------------------------------------------------------------------------------------------------------------------------------------------------------------------------------------------------------------------------------------------------------------------------------------------|
| Visit takes place start of phase 3                                                                                                                                                                                                                                                                                                                                                                                                                                                                                                                                                                                                                                                                                                                                                                                                                                                                                       | Visit takes place half way through chemotherapy                                                                                                                                                                                                                                                                                                                                                                                                                                                                                                                                                                                                                                                   |
| <b>Consultation Focus:</b><br>A new start <ul style="list-style-type: none"> <li>• Diet, Keep active (walk and talk),</li> <li>• Management of weight</li> </ul> <b>Resources:</b> <ul style="list-style-type: none"> <li>• Eatwell plate</li> <li>• 7 day food and drink diary</li> <li>• Booklet: <i>Thinking about becoming more active?</i></li> <li>• 12 week activity diary</li> <li>• Resistance bands</li> <li>• NHS Tayside information <i>Helping you manage your weight</i></li> <li>• Information about personalised weight management</li> <li>• Bowel Cancer UK booklet: <i>Losing Weight Safely</i></li> <li>• Weight awareness plan</li> </ul> <b>Behaviour Change techniques</b> <ul style="list-style-type: none"> <li>• Goal setting for two health behaviours physical activity, smoking, alcohol, diet</li> <li>• Implementation intentions</li> <li>• Self-monitoring (body weight log)</li> </ul> | <b>Consultation Focus</b><br>A new start <ul style="list-style-type: none"> <li>• Diet, Keep active (walk and talk),</li> <li>• Introduce weight management concepts</li> </ul> <b>Resources:</b> <ul style="list-style-type: none"> <li>• Eatwell plate</li> <li>• 7 day food and drink diary</li> <li>• Booklet: <i>Thinking about becoming more active?</i></li> <li>• 12 week activity diary</li> <li>• Resistance bands</li> </ul> <b>Behaviour Change techniques</b> <ul style="list-style-type: none"> <li>• Goal setting for two health behaviours physical activity, smoking, alcohol, diet</li> <li>• Implementation intentions</li> <li>• Self-monitoring (body weight log)</li> </ul> |

Face to face consultation study visit 3 (1 hour; hospital/research centre)

| <b>Participants with no chemotherapy</b>                                                                                                                                                                                                                                                                                                                                                                                                 | <b>Chemotherapy</b>                                                                                                                                                                                                                                                                                                                                                                                                                                                                                                                                                                                                                                                                                           |
|------------------------------------------------------------------------------------------------------------------------------------------------------------------------------------------------------------------------------------------------------------------------------------------------------------------------------------------------------------------------------------------------------------------------------------------|---------------------------------------------------------------------------------------------------------------------------------------------------------------------------------------------------------------------------------------------------------------------------------------------------------------------------------------------------------------------------------------------------------------------------------------------------------------------------------------------------------------------------------------------------------------------------------------------------------------------------------------------------------------------------------------------------------------|
| Scheduled 4 weeks post consultation study visit 2                                                                                                                                                                                                                                                                                                                                                                                        | Visit takes place at end of chemotherapy                                                                                                                                                                                                                                                                                                                                                                                                                                                                                                                                                                                                                                                                      |
| <b>Consultation Focus:</b> <ul style="list-style-type: none"> <li>• "Future planning"</li> <li>• Education and endorsement on healthy eating,</li> <li>• Reinforce physical activity advice</li> </ul> <b>Resources:</b> <ul style="list-style-type: none"> <li>• <i>TREATWELL Getting active and eating well after Bowel Cancer treatment</i></li> <li>• Calories and alcohol information</li> </ul> <b>Behaviour Change techniques</b> | <b>Consultation Focus:</b> <ul style="list-style-type: none"> <li>• "Future planning"</li> <li>• Management of weight</li> <li>• Education and endorsement on healthy eating</li> <li>• Reinforce physical activity advice</li> </ul> <b>Resources:</b> <ul style="list-style-type: none"> <li>• NHS Tayside information <i>Helping you manage your weight</i></li> <li>• Information about personalised weight management</li> <li>• Bowel Cancer UK booklet: <i>Losing Weight Safely</i></li> <li>• Weight awareness plan</li> <li>• <i>TREATWELL Getting active and eating well after Bowel Cancer treatment</i></li> <li>• Calories and alcohol information</li> </ul> <b>Behaviour Change techniques</b> |

And up to 8 Brief telephone calls 10-15 minutes at home

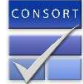

## CONSORT 2010 checklist of information to include when reporting a pilot or feasibility trial\*

| Section/Topic                    | Item No | Checklist item                                                                                                                                                                              | Reported on page No |
|----------------------------------|---------|---------------------------------------------------------------------------------------------------------------------------------------------------------------------------------------------|---------------------|
| <b>Title and abstract</b>        |         |                                                                                                                                                                                             |                     |
|                                  | 1a      | Identification as a pilot or feasibility randomised trial in the title                                                                                                                      | 1                   |
|                                  | 1b      | Structured summary of pilot trial design, methods, results, and conclusions (for specific guidance see CONSORT abstract extension for pilot trials)                                         | 2                   |
| <b>Introduction</b>              |         |                                                                                                                                                                                             |                     |
| Background and objectives        | 2a      | Scientific background and explanation of rationale for future definitive trial, and reasons for randomised pilot trial                                                                      | 5, 6                |
|                                  | 2b      | Specific objectives or research questions for pilot trial                                                                                                                                   | 6                   |
| <b>Methods</b>                   |         |                                                                                                                                                                                             |                     |
| Trial design                     | 3a      | Description of pilot trial design (such as parallel, factorial) including allocation ratio                                                                                                  | 6-9                 |
|                                  | 3b      | Important changes to methods after pilot trial commencement (such as eligibility criteria), with reasons                                                                                    | N/A                 |
| Participants                     | 4a      | Eligibility criteria for participants                                                                                                                                                       | 6                   |
|                                  | 4b      | Settings and locations where the data were collected                                                                                                                                        | 6                   |
|                                  | 4c      | How participants were identified and consented                                                                                                                                              | 6                   |
| Interventions                    | 5       | The interventions for each group with sufficient details to allow replication, including how and when they were actually administered                                                       | 6-8                 |
| Outcomes                         | 6a      | Completely defined prespecified assessments or measurements to address each pilot trial objective specified in 2b, including how and when they were assessed                                | 8, 9                |
|                                  | 6b      | Any changes to pilot trial assessments or measurements after the pilot trial commenced, with reasons                                                                                        | N/A                 |
|                                  | 6c      | If applicable, prespecified criteria used to judge whether, or how, to proceed with future definitive trial                                                                                 | N/A                 |
| Sample size                      | 7a      | Rationale for numbers in the pilot trial                                                                                                                                                    | 6                   |
|                                  | 7b      | When applicable, explanation of any interim analyses and stopping guidelines                                                                                                                | N/A                 |
| Randomisation:                   |         |                                                                                                                                                                                             |                     |
| Sequence generation              | 8a      | Method used to generate the random allocation sequence                                                                                                                                      | N/A                 |
|                                  | 8b      | Type of randomisation(s); details of any restriction (such as blocking and block size)                                                                                                      | N/A                 |
| Allocation concealment mechanism | 9       | Mechanism used to implement the random allocation sequence (such as sequentially numbered containers), describing any steps taken to conceal the sequence until interventions were assigned | N/A                 |

|                                                      |     |                                                                                                                                                                                       |                    |
|------------------------------------------------------|-----|---------------------------------------------------------------------------------------------------------------------------------------------------------------------------------------|--------------------|
| Implementation                                       | 10  | Who generated the random allocation sequence, who enrolled participants, and who assigned participants to interventions                                                               | N/A                |
| Blinding                                             | 11a | If done, who was blinded after assignment to interventions (for example, participants, care providers, those assessing outcomes) and how                                              | N/A                |
|                                                      | 11b | If relevant, description of the similarity of interventions                                                                                                                           | N/A                |
| Statistical methods                                  | 12  | Methods used to address each pilot trial objective whether qualitative or quantitative                                                                                                | 8, 9               |
| <b>Results</b>                                       |     |                                                                                                                                                                                       |                    |
| Participant flow (a diagram is strongly recommended) | 13a | For each group, the numbers of participants who were approached and/or assessed for eligibility, randomly assigned, received intended treatment, and were assessed for each objective | 10, Figs 1 & 2     |
|                                                      | 13b | For each group, losses and exclusions after randomisation, together with reasons                                                                                                      | 10, 11, Figs 1 & 2 |
| Recruitment                                          | 14a | Dates defining the periods of recruitment and follow-up                                                                                                                               | 10                 |
|                                                      | 14b | Why the pilot trial ended or was stopped                                                                                                                                              | N/A                |
| Baseline data                                        | 15  | A table showing baseline demographic and clinical characteristics for each group                                                                                                      | 11                 |
| Numbers analysed                                     | 16  | For each objective, number of participants (denominator) included in each analysis. If relevant, these numbers should be by randomised group                                          | 12                 |
| Outcomes and estimation                              | 17  | For each objective, results including expressions of uncertainty (such as 95% confidence interval) for any estimates. If relevant, these results should be by randomised group        | 12-16              |
| Ancillary analyses                                   | 18  | Results of any other analyses performed that could be used to inform the future definitive trial                                                                                      | N/A                |
| Harms                                                | 19  | All important harms or unintended effects in each group (for specific guidance see CONSORT for harms)                                                                                 | N/A                |
|                                                      | 19a | If relevant, other important unintended consequences                                                                                                                                  | N/A                |
| <b>Discussion</b>                                    |     |                                                                                                                                                                                       |                    |
| Limitations                                          | 20  | Pilot trial limitations, addressing sources of potential bias and remaining uncertainty about feasibility                                                                             | 2,16, 17           |
| Generalisability                                     | 21  | Generalisability (applicability) of pilot trial methods and findings to future definitive trial and other studies                                                                     | 16, 17             |
| Interpretation                                       | 22  | Interpretation consistent with pilot trial objectives and findings, balancing potential benefits and harms, and considering other relevant evidence                                   | 16, 17             |
|                                                      | 22a | Implications for progression from pilot to future definitive trial, including any proposed amendments                                                                                 | 16, 17             |
| <b>Other information</b>                             |     |                                                                                                                                                                                       |                    |
| Registration                                         | 23  | Registration number for pilot trial and name of trial registry                                                                                                                        | 2                  |
| Protocol                                             | 24  | Where the pilot trial protocol can be accessed, if available                                                                                                                          | N/A                |
| Funding                                              | 25  | Sources of funding and other support (such as supply of drugs), role of funders                                                                                                       | 3                  |
|                                                      | 26  | Ethical approval or approval by research review committee, confirmed with reference number                                                                                            | 3                  |

1  
2  
3  
4  
5  
6  
7  
8  
9  
10  
11  
12  
13  
14  
15  
16  
17  
18  
19  
20  
21  
22  
23  
24  
25  
26  
27  
28  
29  
30  
31  
32  
33  
34  
35  
36  
37  
38  
39  
40  
41  
42  
43  
44  
45  
46  
47

Citation: Eldridge SM, Chan CL, Campbell MJ, Bond CM, Hopewell S, Thabane L, et al. CONSORT 2010 statement: extension to randomised pilot and feasibility trials. BMJ. 2016;355.  
\*We strongly recommend reading this statement in conjunction with the CONSORT 2010, extension to randomised pilot and feasibility trials, Explanation and Elaboration for important clarifications on all the items. If relevant, we also recommend reading CONSORT extensions for cluster randomised trials, non-inferiority and equivalence trials, non-pharmacological treatments, herbal interventions, and pragmatic trials. Additional extensions are forthcoming: for those and for up to date references relevant to this checklist, see [www.consort-statement.org](http://www.consort-statement.org).

For peer review only
